# Supplementary material
Source: Research Square preprint supplement (doi:10.21203/rs.3.rs-9703493/v1)
Supplement: Supplementary file 2 [file AAV-Hypertransposase.pdf › NTA/AAV/AAV-Hypertransposase.pdf]

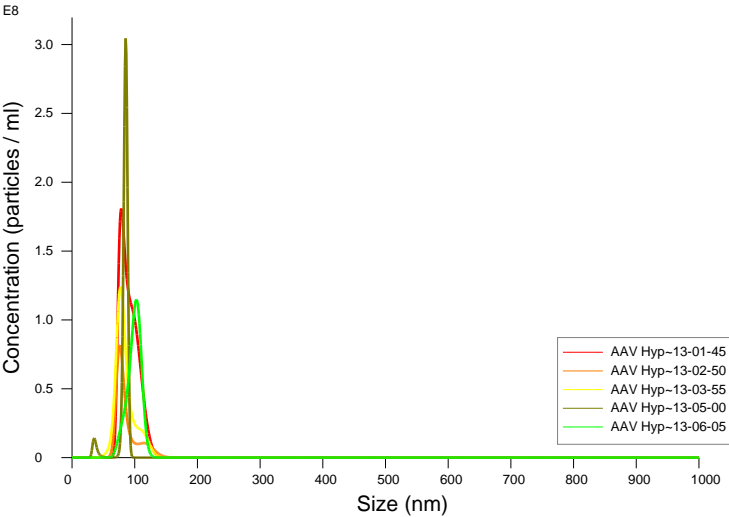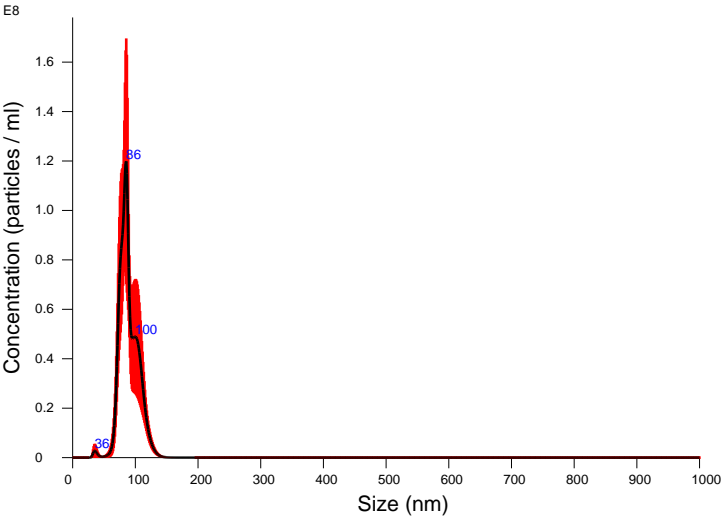

Included Files

AAV Hypertransposase 1000x 5 60 120 2024-12-18 13-01-45  
AAV Hypertransposase 1000x 5 60 120 2024-12-18 13-02-50  
AAV Hypertransposase 1000x 5 60 120 2024-12-18 13-03-55  
AAV Hypertransposase 1000x 5 60 120 2024-12-18 13-05-00  
AAV Hypertransposase 1000x 5 60 120 2024-12-18 13-06-05

Details

NTA Version: NTA 3.4 - Sample Assistant Build 3.4.4 - SA  
Script Used: SOP Standard Measurement 12-58-31PM 18~  
Time Captured: 12:58:48 18/12/2024  
Operator: Jitka  
Pre-treatment:  
Sample Name:  
Diluent: pbs  
Remarks:

Capture Settings

Camera Type: sCMOS  
Laser Type: Blue405  
Camera Level: 12  
Slider Shutter: 1200  
Slider Gain: 146  
FPS: 25.0  
Number of Frames: 1498  
Temperature: 25.0 - 25.0 °C  
Viscosity: 1.0 cP  
Dilution factor: 1 x 10e3  
Syringe Pump Speed: 120

Analysis Settings

Detect Threshold: 5  
Blur Size: Auto  
Max Jump Distance: Auto: 14.6 pix

Results

Stats: Merged Data

Mean: 89.4 nm  
Mode: 85.1 nm  
SD: 14.8 nm  
D10: 73.4 nm  
D50: 86.7 nm  
D90: 109.8 nm

Stats: Mean +/- Standard Error

Mean: 88.8 +/- 2.9 nm  
Mode: 84.1 +/- 4.9 nm  
SD: 13.8 +/- 1.3 nm  
D10: 75.5 +/- 2.7 nm  
D50: 87.0 +/- 3.7 nm  
D90: 107.4 +/- 4.7 nm  
Concentration (Upgrade): 3.14e+09 +/- 5.98e+08 particles/ml  
0.3 +/- 0.0 particles/frame  
0.4 +/- 0.0 centres/frame

Concentration measurements may be unreliable  
See summary file for more info

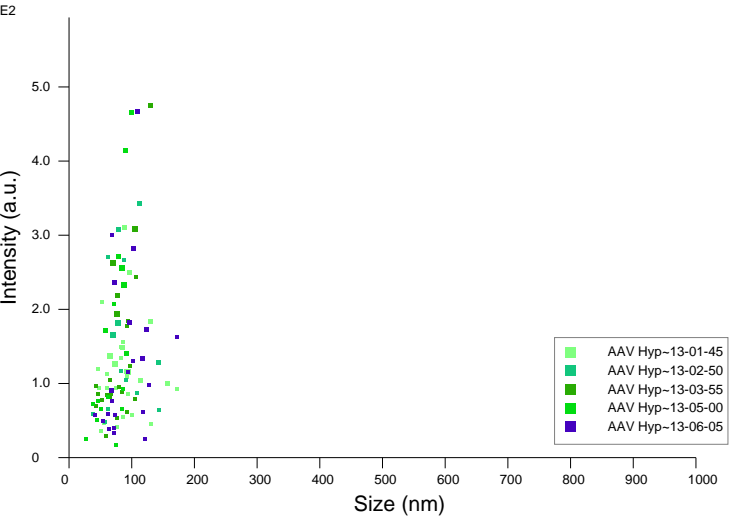

Intensity / Size graph for Experiment:  
AAV Hypertransposase 1000x 5 60 120 2024-12-18 12-58-48

Script Used: (Full Text):

SOP Standard Measurement 12-58-31PM 18Dec2024.txt
