# Supplementary material
Source: Research Square preprint supplement (doi:10.21203/rs.3.rs-9703493/v1)
Supplement: Supplementary file 3 [file AAV-Sox2-mStrawberry.pdf › NTA/AAV/AAV-Sox2-mStrawberry.pdf]

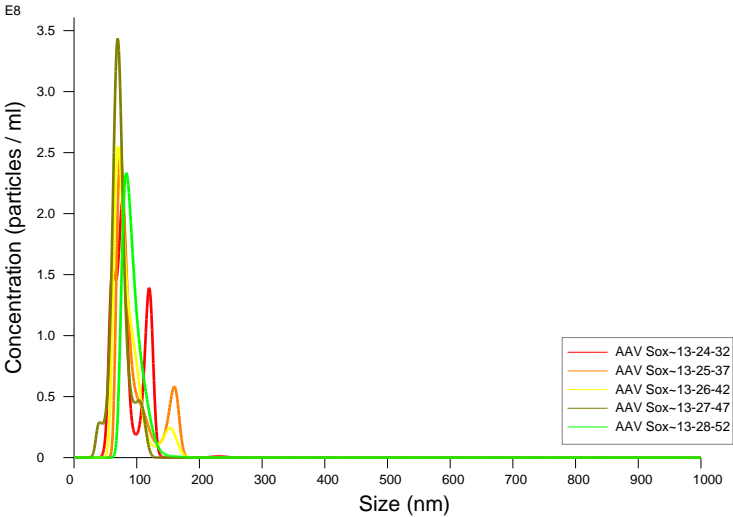

FTLA Concentration / Size graph for Experiment:  
AAV Sox2 mSTR 1000x 5 60 120 2024-12-18 13-21-30

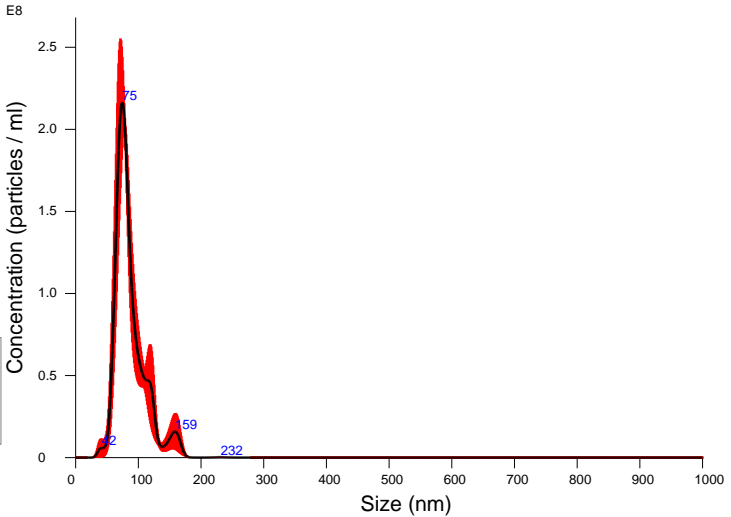

Averaged FTLA Concentration / Size for Experiment:  
AAV Sox2 mSTR 1000x 5 60 120 2024-12-18 13-21-30  
Error bars indicate + / -1 standard error of the mean

|                                                                                                                                                                                                                                                                                                                                                                                                                                                                                                                                                                                                                                                                                                                                                                                                                                                                                                                                                                                                                                                                                                                                                                   |                                                                                                                                                                                                                                                                                                                                                                                                                                                                                                                                                                                                                                                                                                                                            |
|-------------------------------------------------------------------------------------------------------------------------------------------------------------------------------------------------------------------------------------------------------------------------------------------------------------------------------------------------------------------------------------------------------------------------------------------------------------------------------------------------------------------------------------------------------------------------------------------------------------------------------------------------------------------------------------------------------------------------------------------------------------------------------------------------------------------------------------------------------------------------------------------------------------------------------------------------------------------------------------------------------------------------------------------------------------------------------------------------------------------------------------------------------------------|--------------------------------------------------------------------------------------------------------------------------------------------------------------------------------------------------------------------------------------------------------------------------------------------------------------------------------------------------------------------------------------------------------------------------------------------------------------------------------------------------------------------------------------------------------------------------------------------------------------------------------------------------------------------------------------------------------------------------------------------|
| <div>Included Files</div> <div>AAV Sox2 mSTR 1000x 5 60 120 2024-12-18 13-24-32<br/>AAV Sox2 mSTR 1000x 5 60 120 2024-12-18 13-25-37<br/>AAV Sox2 mSTR 1000x 5 60 120 2024-12-18 13-26-42<br/>AAV Sox2 mSTR 1000x 5 60 120 2024-12-18 13-27-47<br/>AAV Sox2 mSTR 1000x 5 60 120 2024-12-18 13-28-52</div> <div>Details</div> <div><div>NTA Version:NTA 3.4 - Sample Assistant Build 3.4.4 - SA</div><div>Script Used:SOP Standard Measurement 01-21-10PM 18~</div><div>Time Captured:13:21:30 18/12/2024</div><div>Operator:Jitka</div><div>Pre-treatment:</div><div>Sample Name:</div><div>Diluent:pbs</div><div>Remarks:</div></div> <div>Capture Settings</div> <div><div>Camera Type:sCMOS</div><div>Laser Type:Blue405</div><div>Camera Level:12</div><div>Slider Shutter:1200</div><div>Slider Gain:146</div><div>FPS:25.0</div><div>Number of Frames:1498</div><div>Temperature:25.0 - 25.0 °C</div><div>Viscosity:1.0 cP</div><div>Dilution factor:1 x 10e3</div><div>Syringe Pump Speed:120</div></div> <div>Analysis Settings</div> <div><div>Detect Threshold:5</div><div>Blur Size:Auto</div><div>Max Jump Distance:Auto: 14.6 - 18.7 pix</div></div> | <div>Results</div> <div><div>Stats: Merged Data</div><div><div>Mean:86.3 nm</div><div>Mode:74.3 nm</div><div>SD:24.3 nm</div><div>D10:63.1 nm</div><div>D50:79.9 nm</div><div>D90:119.1 nm</div></div></div> <div><div>Stats: Mean +/- Standard Error</div><div><div>Mean:86.9 +/- 3.9 nm</div><div>Mode:74.9 +/- 2.5 nm</div><div>SD:22.2 +/- 3.0 nm</div><div>D10:65.3 +/- 3.5 nm</div><div>D50:80.2 +/- 3.0 nm</div><div>D90:120.9 +/- 9.8 nm</div></div></div> <div><div>Concentration (Upgrade): 7.97e+09 +/- 3.14e+08 particles/ml</div><div>0.7 +/- 0.0 particles/frame</div><div>0.8 +/- 0.0 centres/frame</div></div> <div><div>Concentration measurements may be unreliable</div><div>See summary file for more info</div></div> |
|-------------------------------------------------------------------------------------------------------------------------------------------------------------------------------------------------------------------------------------------------------------------------------------------------------------------------------------------------------------------------------------------------------------------------------------------------------------------------------------------------------------------------------------------------------------------------------------------------------------------------------------------------------------------------------------------------------------------------------------------------------------------------------------------------------------------------------------------------------------------------------------------------------------------------------------------------------------------------------------------------------------------------------------------------------------------------------------------------------------------------------------------------------------------|--------------------------------------------------------------------------------------------------------------------------------------------------------------------------------------------------------------------------------------------------------------------------------------------------------------------------------------------------------------------------------------------------------------------------------------------------------------------------------------------------------------------------------------------------------------------------------------------------------------------------------------------------------------------------------------------------------------------------------------------|

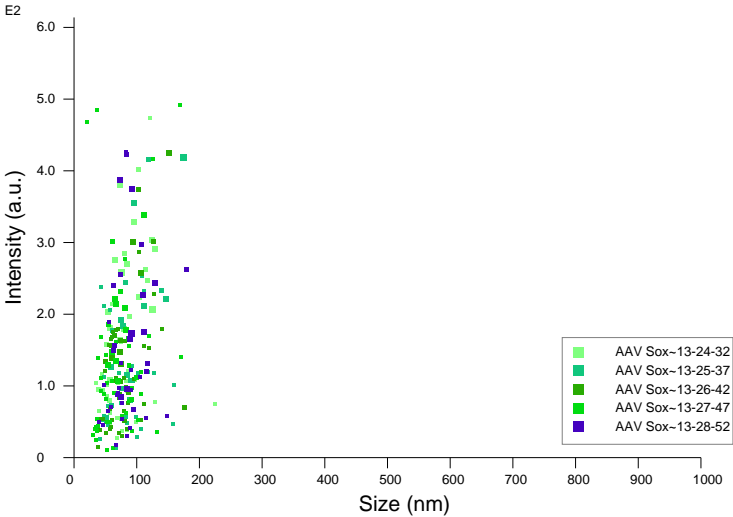

Script Used: (Full Text):

SOP Standard Measurement 01-21-10PM 18Dec2024.txt
