# Supplementary material
Source: Research Square preprint supplement (doi:10.21203/rs.3.rs-9703493/v1)
Supplement: Supplementary file 4 [file EV-EGFP transposon.pdf › NTA/EV without AAV (ref.formulations)/EV-EGFP transposon.pdf]

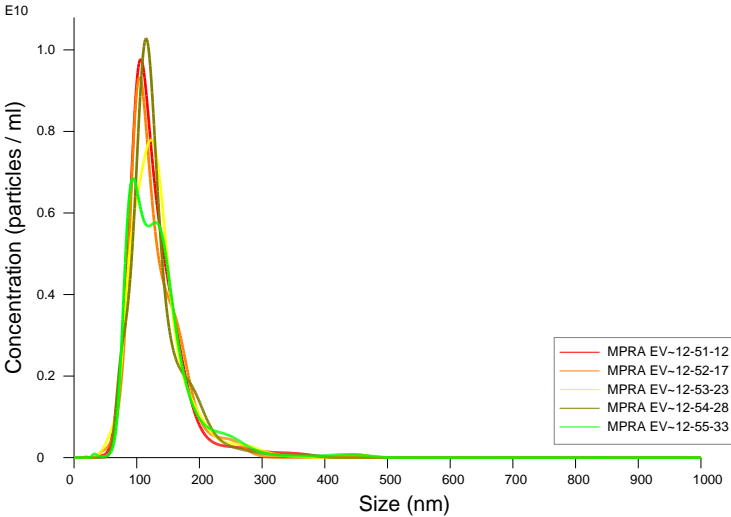

FTLA Concentration / Size graph for Experiment:  
MPRA EV 1000x 5 60 120 2024-10-30 12-48-03

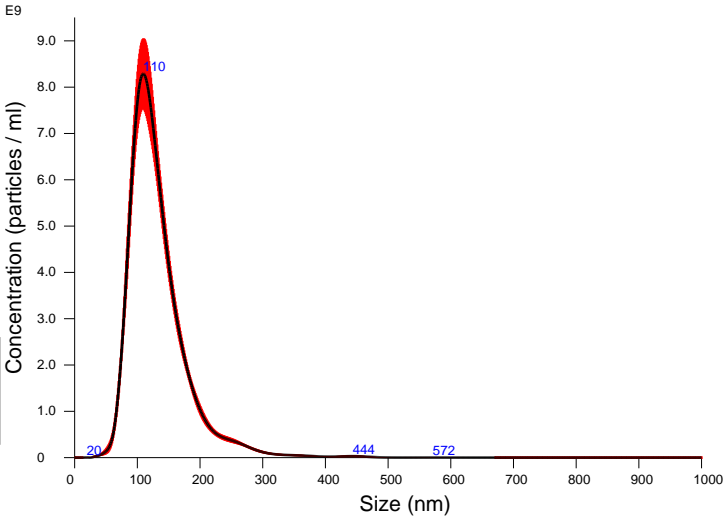

Averaged FTLA Concentration / Size for Experiment:  
MPRA EV 1000x 5 60 120 2024-10-30 12-48-03  
Error bars indicate + / - 1 standard error of the mean

Included Files

MPRA EV 1000x 5 60 120 2024-10-30 12-51-12  
MPRA EV 1000x 5 60 120 2024-10-30 12-52-17  
MPRA EV 1000x 5 60 120 2024-10-30 12-53-23  
MPRA EV 1000x 5 60 120 2024-10-30 12-54-28  
MPRA EV 1000x 5 60 120 2024-10-30 12-55-33

Details

NTA Version: NTA 3.4 - Sample Assistant Build 3.4.4 - SA  
Script Used: SOP Standard Measurement 12-48-03PM 300~  
Time Captured: 12:48:03 30/10/2024  
Operator: Jitka NeburkovÆ  
Pre-treatment:  
Sample Name:  
Diluent:  
Remarks:

Capture Settings

Camera Type: sCMOS  
Laser Type: Blue405  
Camera Level: 12  
Slider Shutter: 1200  
Slider Gain: 146  
FPS: 25.0  
Number of Frames: 1498  
Temperature: 25.0 - 25.0 °C  
Viscosity: 1.0 cP  
Dilution factor: 1 x 10e3  
Syringe Pump Speed: 120

Analysis Settings

Detect Threshold: 5  
Blur Size: Auto  
Max Jump Distance: Auto: 16.7 - 17.2 pix

Results

Stats: Merged Data

Mean: 132.5 nm  
Mode: 109.5 nm  
SD: 48.3 nm  
D10: 87.1 nm  
D50: 122.1 nm  
D90: 187.2 nm

Stats: Mean +/- Standard Error

Mean: 132.5 +/- 1.1 nm  
Mode: 108.6 +/- 4.9 nm  
SD: 48.2 +/- 2.1 nm  
D10: 87.2 +/- 0.6 nm  
D50: 122.3 +/- 1.3 nm  
D90: 187.8 +/- 3.2 nm  
Concentration (Upgrade): 6.54e+11 +/- 1.12e+10 particles/ml  
47.0 +/- 0.5 particles/frame  
49.4 +/- 0.4 centres/frame

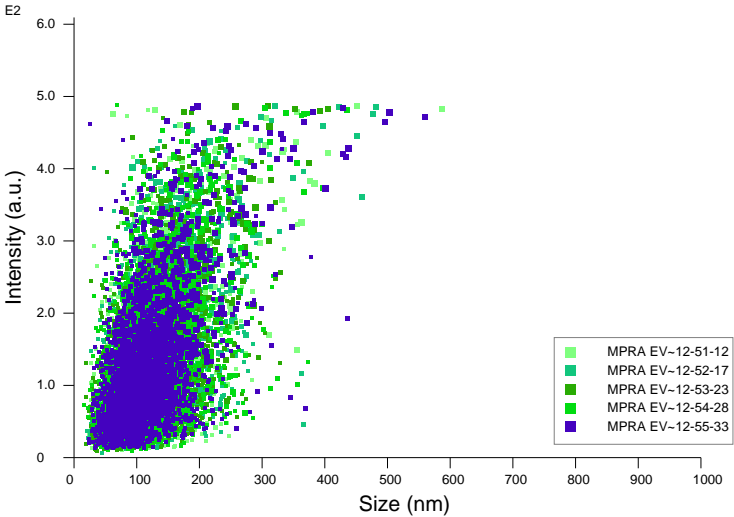

Intensity / Size graph for Experiment:  
MPRA EV 1000x 5 60 120 2024-10-30 12-48-03

**Script Used: (Full Text):**

SOP Standard Measurement 12-48-03PM 30Oct2024.txt
