# Supplementary material
Source: Research Square preprint supplement (doi:10.21203/rs.3.rs-9703493/v1)
Supplement: Supplementary file 5 [file EV-Hypertransposase.pdf › NTA/EV without AAV (ref.formulations)/EV-Hypertransposase.pdf]

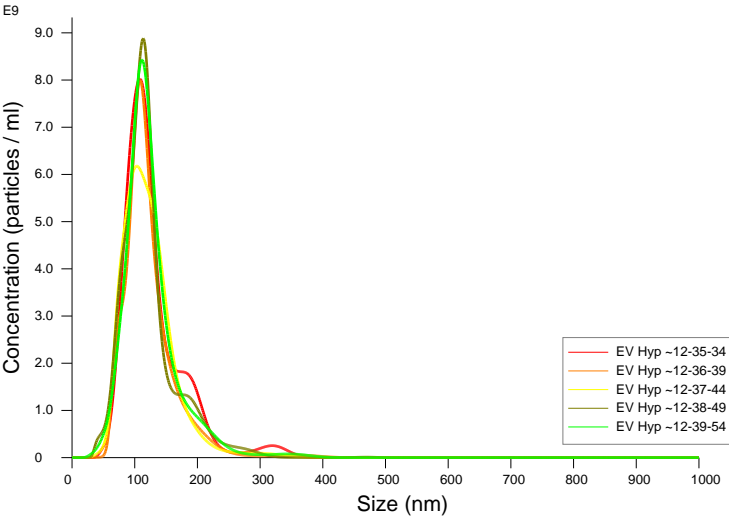

FTLA Concentration / Size graph for Experiment:  
EV Hyp 1000x 5 60 120 2024-10-30 12-32-35

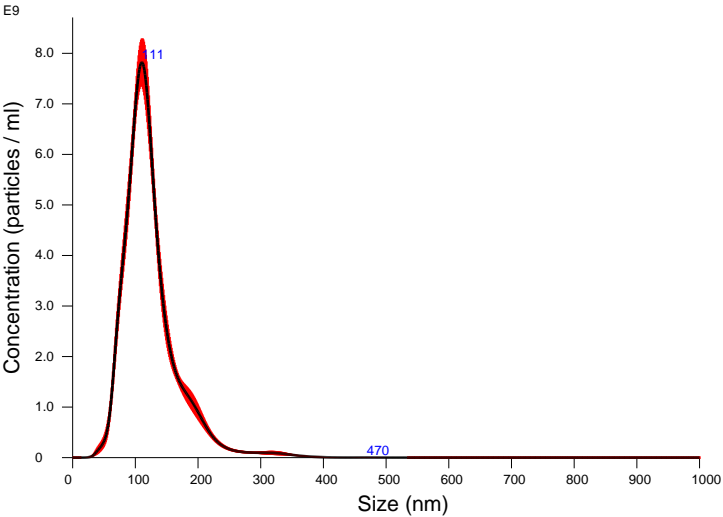

Averaged FTLA Concentration / Size for Experiment:  
EV Hyp 1000x 5 60 120 2024-10-30 12-32-35  
Error bars indicate + / - 1 standard error of the mean

|                                                                                                                                                                                                                                                                                                                                                                                                                                                                                                                                                                                                                                                                                                                                                                                                                                                                                                                                                                                                                                                                                                                                                                             |                                                                                                                                                                                                                                                                                                                                                                                                                                                                                                                                                                                                                                     |
|-----------------------------------------------------------------------------------------------------------------------------------------------------------------------------------------------------------------------------------------------------------------------------------------------------------------------------------------------------------------------------------------------------------------------------------------------------------------------------------------------------------------------------------------------------------------------------------------------------------------------------------------------------------------------------------------------------------------------------------------------------------------------------------------------------------------------------------------------------------------------------------------------------------------------------------------------------------------------------------------------------------------------------------------------------------------------------------------------------------------------------------------------------------------------------|-------------------------------------------------------------------------------------------------------------------------------------------------------------------------------------------------------------------------------------------------------------------------------------------------------------------------------------------------------------------------------------------------------------------------------------------------------------------------------------------------------------------------------------------------------------------------------------------------------------------------------------|
| <div><div>Included Files</div><div>EV Hyp 1000x 5 60 120 2024-10-30 12-35-34<br/>EV Hyp 1000x 5 60 120 2024-10-30 12-36-39<br/>EV Hyp 1000x 5 60 120 2024-10-30 12-37-44<br/>EV Hyp 1000x 5 60 120 2024-10-30 12-38-49<br/>EV Hyp 1000x 5 60 120 2024-10-30 12-39-54</div><div><div>Details</div><div><div>NTA Version:NTA 3.4 - Sample Assistant Build 3.4.4 - SA</div><div>Script Used:SOP Standard Measurement 12-32-35PM 300~</div><div>Time Captured:12:32:35 30/10/2024</div><div>Operator:Jitka NeburkovÆ</div><div>Pre-treatment:</div><div>Sample Name:</div><div>Diluent:</div><div>Remarks:</div></div><div><div>Capture Settings</div><div><div>Camera Type:sCMOS</div><div>Laser Type:Blue405</div><div>Camera Level:12</div><div>Slider Shutter:1200</div><div>Slider Gain:146</div><div>FPS:25.0</div><div>Number of Frames:1498</div><div>Temperature:25.0 - 25.0 °C</div><div>Viscosity:1.0 cP</div><div>Dilution factor:1 x 10e3</div><div>Syringe Pump Speed:120</div></div><div><div>Analysis Settings</div><div><div>Detect Threshold:5</div><div>Blur Size:Auto</div><div>Max Jump Distance:Auto: 17.1 - 20.9 pix</div></div></div></div></div></div> | <div><div>Results</div><div><div>Stats: Merged Data</div><div><div>Mean:124.1 nm</div><div>Mode:110.4 nm</div><div>SD:45.0 nm</div><div>D10:79.6 nm</div><div>D50:115.2 nm</div><div>D90:180.1 nm</div></div><div><div>Stats: Mean +/- Standard Error</div><div><div>Mean:124.0 +/- 1.3 nm</div><div>Mode:109.0 +/- 1.7 nm</div><div>SD:44.8 +/- 1.3 nm</div><div>D10:79.6 +/- 1.1 nm</div><div>D50:115.2 +/- 0.6 nm</div><div>D90:179.1 +/- 3.8 nm</div><div>Concentration (Upgrade): 5.57e+11 +/- 1.69e+10 particles/ml</div><div>41.2 +/- 1.2 particles/frame</div><div>43.6 +/- 0.6 centres/frame</div></div></div></div></div> |
|-----------------------------------------------------------------------------------------------------------------------------------------------------------------------------------------------------------------------------------------------------------------------------------------------------------------------------------------------------------------------------------------------------------------------------------------------------------------------------------------------------------------------------------------------------------------------------------------------------------------------------------------------------------------------------------------------------------------------------------------------------------------------------------------------------------------------------------------------------------------------------------------------------------------------------------------------------------------------------------------------------------------------------------------------------------------------------------------------------------------------------------------------------------------------------|-------------------------------------------------------------------------------------------------------------------------------------------------------------------------------------------------------------------------------------------------------------------------------------------------------------------------------------------------------------------------------------------------------------------------------------------------------------------------------------------------------------------------------------------------------------------------------------------------------------------------------------|

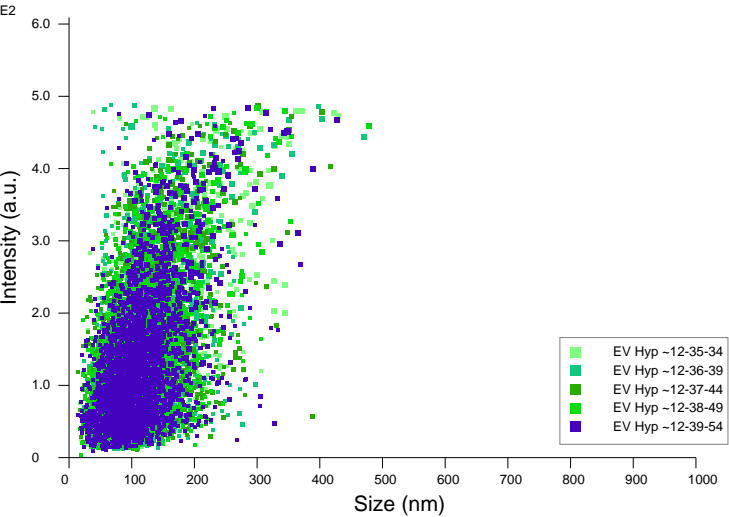

Script Used: (Full Text):

SOP Standard Measurement 12-32-35PM 30Oct2024.txt
