# Supplementary material
Source: Research Square preprint supplement (doi:10.21203/rs.3.rs-9703493/v1)
Supplement: Supplementary file 6 [file EV-Sox2-mStrawberry.pdf › NTA/EV without AAV (ref.formulations)/EV-Sox2-mStrawberry.pdf]

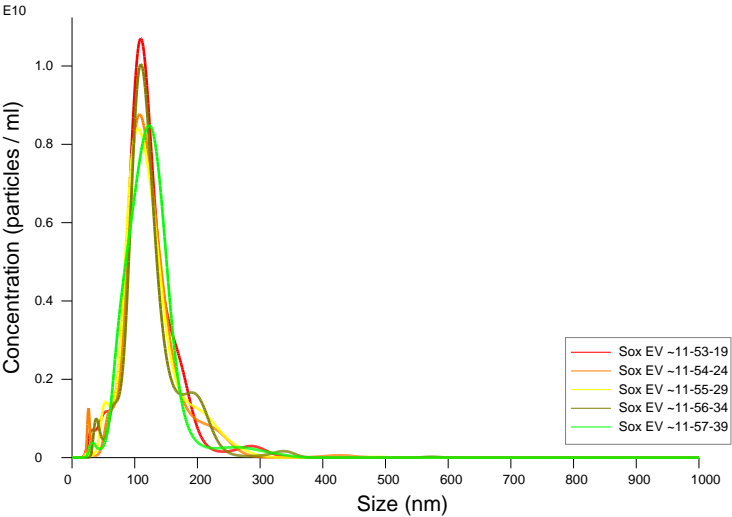

FTLA Concentration / Size graph for Experiment:  
Sox EV 1000x 5 60 120 2024-10-30 11-50-19

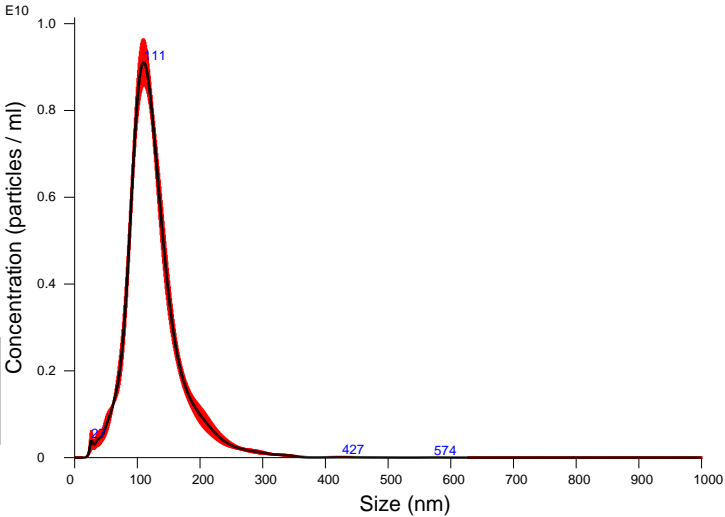

Averaged FTLA Concentration / Size for Experiment:  
Sox EV 1000x 5 60 120 2024-10-30 11-50-19  
Error bars indicate + / - 1 standard error of the mean

|                                                                                                                                                                                                                                                                                                                                                                                                                                                                                                                                                                                                                                                                                                                                                                                                                                                                                                                                                                                                                                                                                                                                                                             |                                                                                                                                                                                                                                                                                                                                                                                                                                                                                                                                                                                                                                    |
|-----------------------------------------------------------------------------------------------------------------------------------------------------------------------------------------------------------------------------------------------------------------------------------------------------------------------------------------------------------------------------------------------------------------------------------------------------------------------------------------------------------------------------------------------------------------------------------------------------------------------------------------------------------------------------------------------------------------------------------------------------------------------------------------------------------------------------------------------------------------------------------------------------------------------------------------------------------------------------------------------------------------------------------------------------------------------------------------------------------------------------------------------------------------------------|------------------------------------------------------------------------------------------------------------------------------------------------------------------------------------------------------------------------------------------------------------------------------------------------------------------------------------------------------------------------------------------------------------------------------------------------------------------------------------------------------------------------------------------------------------------------------------------------------------------------------------|
| <div><div>Included Files</div><div>Sox EV 1000x 5 60 120 2024-10-30 11-53-19<br/>Sox EV 1000x 5 60 120 2024-10-30 11-54-24<br/>Sox EV 1000x 5 60 120 2024-10-30 11-55-29<br/>Sox EV 1000x 5 60 120 2024-10-30 11-56-34<br/>Sox EV 1000x 5 60 120 2024-10-30 11-57-39</div><div><div>Details</div><div><div>NTA Version:NTA 3.4 - Sample Assistant Build 3.4.4 - SA</div><div>Script Used:SOP Standard Measurement 11-50-19AM 300~</div><div>Time Captured:11:50:19 30/10/2024</div><div>Operator:Jitka NeburkovÆ</div><div>Pre-treatment:</div><div>Sample Name:</div><div>Diluent:</div><div>Remarks:</div></div><div><div>Capture Settings</div><div><div>Camera Type:sCMOS</div><div>Laser Type:Blue405</div><div>Camera Level:12</div><div>Slider Shutter:1200</div><div>Slider Gain:146</div><div>FPS:25.0</div><div>Number of Frames:1498</div><div>Temperature:25.0 - 25.0 °C</div><div>Viscosity:1.0 cP</div><div>Dilution factor:1 x 10e3</div><div>Syringe Pump Speed:120</div></div><div><div>Analysis Settings</div><div><div>Detect Threshold:5</div><div>Blur Size:Auto</div><div>Max Jump Distance:Auto: 20.3 - 22.3 pix</div></div></div></div></div></div> | <div><div>Results</div><div><div>Stats: Merged Data</div><div><div>Mean:126.0 nm</div><div>Mode:110.0 nm</div><div>SD:45.5 nm</div><div>D10:82.1 nm</div><div>D50:118.2 nm</div><div>D90:180.2 nm</div></div></div><div><div>Stats: Mean +/- Standard Error</div><div><div>Mean:126.1 +/- 0.8 nm</div><div>Mode:111.1 +/- 3.1 nm</div><div>SD:45.5 +/- 1.0 nm</div><div>D10:82.3 +/- 1.0 nm</div><div>D50:118.2 +/- 0.8 nm</div><div>D90:181.2 +/- 5.1 nm</div><div>Concentration (Upgrade):6.73e+11 +/- 1.60e+10 particles/ml</div><div>50.2 +/- 1.2 particles/frame</div><div>52.1 +/- 0.9 centres/frame</div></div></div></div> |
|-----------------------------------------------------------------------------------------------------------------------------------------------------------------------------------------------------------------------------------------------------------------------------------------------------------------------------------------------------------------------------------------------------------------------------------------------------------------------------------------------------------------------------------------------------------------------------------------------------------------------------------------------------------------------------------------------------------------------------------------------------------------------------------------------------------------------------------------------------------------------------------------------------------------------------------------------------------------------------------------------------------------------------------------------------------------------------------------------------------------------------------------------------------------------------|------------------------------------------------------------------------------------------------------------------------------------------------------------------------------------------------------------------------------------------------------------------------------------------------------------------------------------------------------------------------------------------------------------------------------------------------------------------------------------------------------------------------------------------------------------------------------------------------------------------------------------|

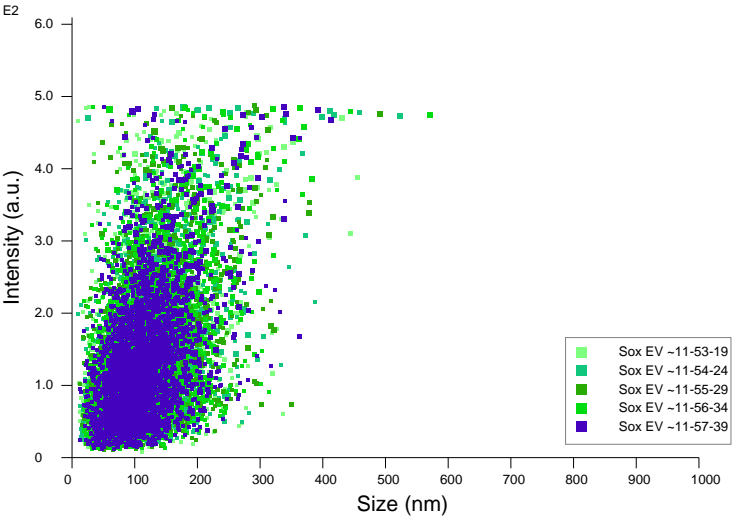

Intensity / Size graph for Experiment:  
Sox EV 1000x 5 60 120 2024-10-30 11-50-19

**Script Used: (Full Text):**

SOP Standard Measurement 11-50-19AM 30Oct2024.txt
