# Supplementary material
Source: Research Square preprint supplement (doi:10.21203/rs.3.rs-9703493/v1)
Supplement: Supplementary file 7 [file Actn1 cKO.pdf › NTA/UC/Actn1 cKO.pdf]

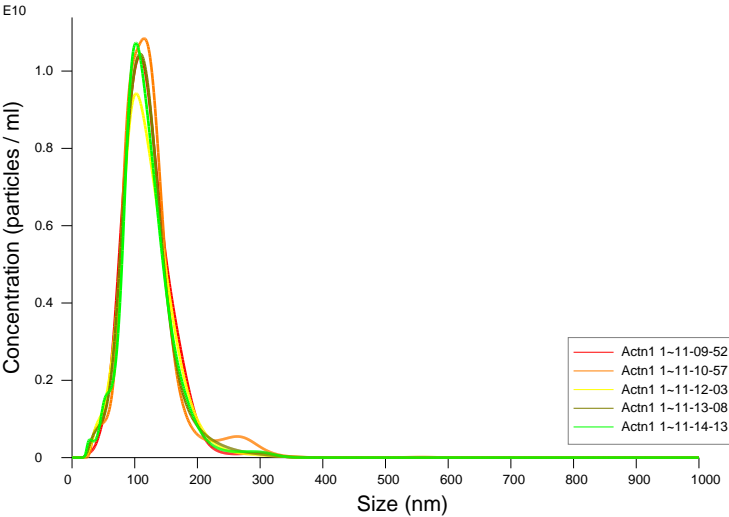

FTLA Concentration / Size graph for Experiment:  
Actn1 1000x 5 60 120 2024-10-30 11-06-49

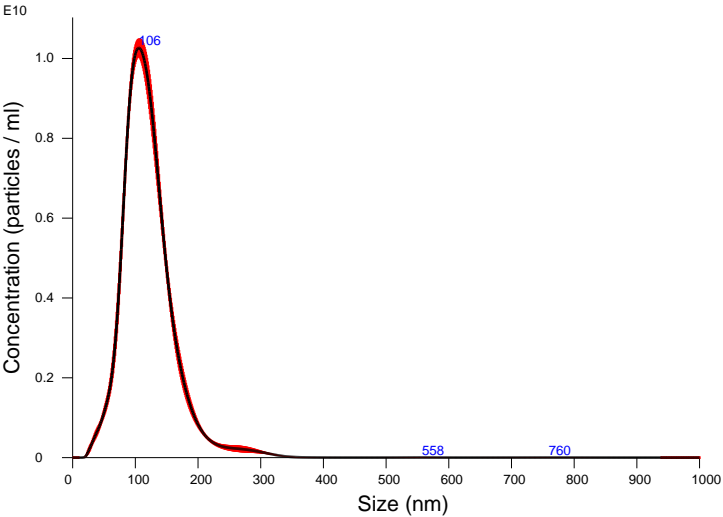

Averaged FTLA Concentration / Size for Experiment:  
Actn1 1000x 5 60 120 2024-10-30 11-06-49  
Error bars indicate + / -1 standard error of the mean

Included Files

Actn1 1000x 5 60 120 2024-10-30 11-09-52  
Actn1 1000x 5 60 120 2024-10-30 11-10-57  
Actn1 1000x 5 60 120 2024-10-30 11-12-03  
Actn1 1000x 5 60 120 2024-10-30 11-13-08  
Actn1 1000x 5 60 120 2024-10-30 11-14-13

Details

NTA Version: NTA 3.4 - Sample Assistant Build 3.4.4 - SA  
Script Used: SOP Standard Measurement 11-06-49AM 300~  
Time Captured: 11:06:49 30/10/2024  
Operator: Jitka NeburkovÆ  
Pre-treatment:  
Sample Name:  
Diluent:  
Remarks:

Capture Settings

Camera Type: sCMOS  
Laser Type: Blue405  
Camera Level: 12  
Slider Shutter: 1200  
Slider Gain: 146  
FPS: 25.0  
Number of Frames: 1498  
Temperature: 25.0 - 25.0 °C  
Viscosity: 1.0 cP  
Dilution factor: 1 x 10e3  
Syringe Pump Speed: 120

Analysis Settings

Detect Threshold: 5  
Blur Size: Auto  
Max Jump Distance: Auto: 19.1 - 20.9 pix

Results

Stats: Merged Data

Mean: 120.6 nm  
Mode: 105.6 nm  
SD: 43.2 nm  
D10: 77.1 nm  
D50: 114.6 nm  
D90: 168.8 nm

Stats: Mean +/- Standard Error

Mean: 120.5 +/- 0.8 nm  
Mode: 107.2 +/- 2.4 nm  
SD: 43.0 +/- 1.7 nm  
D10: 77.0 +/- 0.9 nm  
D50: 114.6 +/- 0.5 nm  
D90: 168.7 +/- 0.8 nm  
Concentration (Upgrade): 8.36e+11 +/- 1.55e+10 particles/ml  
63.5 +/- 0.9 particles/frame  
65.2 +/- 0.8 centres/frame

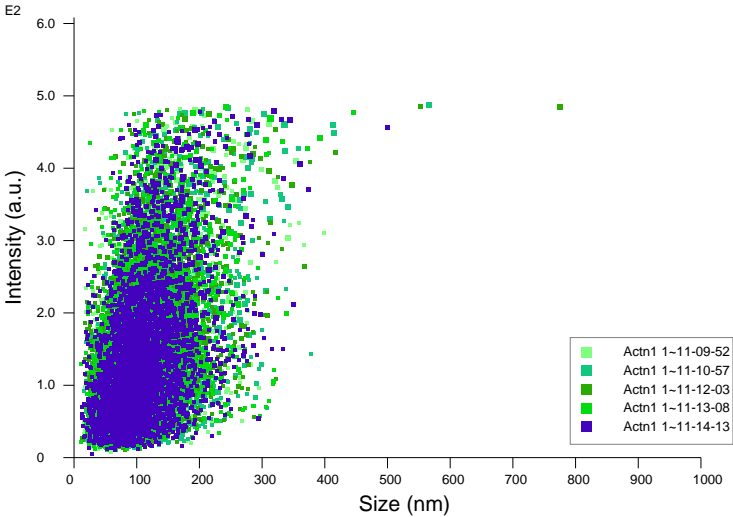

Script Used: (Full Text):

SOP Standard Measurement 11-06-49AM 30Oct2024.txt
