# Supplementary material
Source: Research Square preprint supplement (doi:10.21203/rs.3.rs-9703493/v1)
Supplement: Supplementary file 8 [file Alox5ap-CCre-CGFP.pdf › NTA/UC/Alox5ap-CCre-CGFP.pdf]

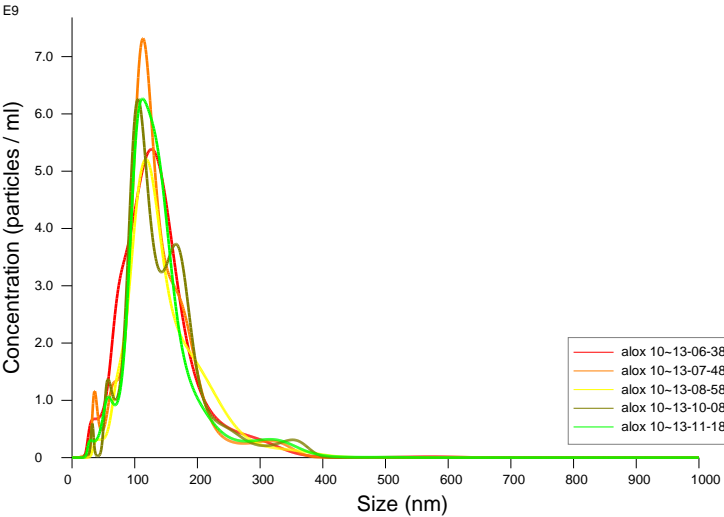

FTLA Concentration / Size graph for Experiment:  
alox 1000x 5 60 120 2025-07-24 13-03-39

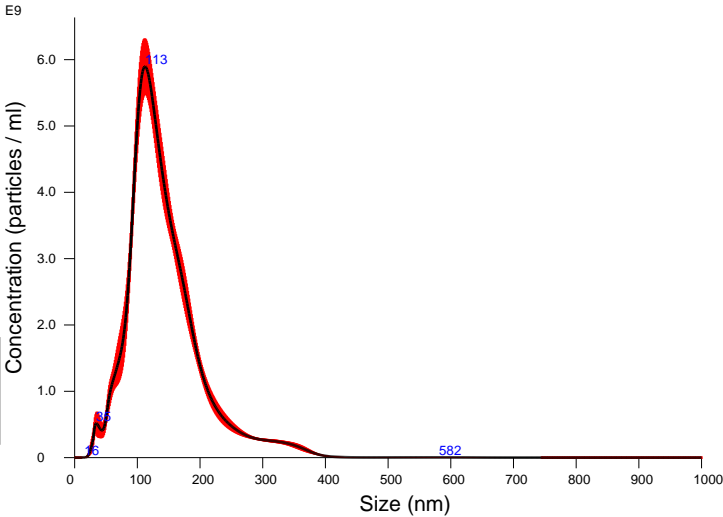

Averaged FTLA Concentration / Size for Experiment:  
alox 1000x 5 60 120 2025-07-24 13-03-39  
Error bars indicate + / - 1 standard error of the mean

|                                                                                                                                                                                                                                                                                                                                                                                                                                                                                                                                                                                                                                                                                                                                                                                                                                                                                                                                                                                                                                                                                                                         |                                                                                                                                                                                                                                                                                                                                                                                                                                                                                                                                                                                                                |
|-------------------------------------------------------------------------------------------------------------------------------------------------------------------------------------------------------------------------------------------------------------------------------------------------------------------------------------------------------------------------------------------------------------------------------------------------------------------------------------------------------------------------------------------------------------------------------------------------------------------------------------------------------------------------------------------------------------------------------------------------------------------------------------------------------------------------------------------------------------------------------------------------------------------------------------------------------------------------------------------------------------------------------------------------------------------------------------------------------------------------|----------------------------------------------------------------------------------------------------------------------------------------------------------------------------------------------------------------------------------------------------------------------------------------------------------------------------------------------------------------------------------------------------------------------------------------------------------------------------------------------------------------------------------------------------------------------------------------------------------------|
| <div>Included Files</div> <div>alox 1000x 5 60 120 2025-07-24 13-06-38<br/>alox 1000x 5 60 120 2025-07-24 13-07-48<br/>alox 1000x 5 60 120 2025-07-24 13-08-58<br/>alox 1000x 5 60 120 2025-07-24 13-10-08<br/>alox 1000x 5 60 120 2025-07-24 13-11-18</div> <div>Details</div> <div><div>NTA Version:NTA 3.4 - Sample Assistant Build 3.4.4 - SA</div><div>Script Used:SOP Standard Measurement 01-03-33PM 24J~</div><div>Time Captured:13:03:39 24/07/2025</div><div>Operator:jitka</div><div>Pre-treatment:</div><div>Sample Name:</div><div>Diluent:water</div><div>Remarks:</div></div> <div>Capture Settings</div> <div><div>Camera Type:sCMOS</div><div>Laser Type:Blue405</div><div>Camera Level:12</div><div>Slider Shutter:1200</div><div>Slider Gain:146</div><div>FPS:25.0</div><div>Number of Frames:1498</div><div>Temperature:25.0 - 25.0 °C</div><div>Viscosity:1.0 cP</div><div>Dilution factor:1 x 10e3</div><div>Syringe Pump Speed:120</div></div> <div>Analysis Settings</div> <div><div>Detect Threshold:5</div><div>Blur Size:Auto</div><div>Max Jump Distance:Auto: 17.4 - 22.9 pix</div></div> | <div>Results</div> <div><div>Stats: Merged Data</div><div><div>Mean:143.3 nm</div><div>Mode:112.3 nm</div><div>SD:61.0 nm</div><div>D10:83.8 nm</div><div>D50:130.6 nm</div><div>D90:216.6 nm</div></div></div> <div><div>Stats: Mean +/- Standard Error</div><div><div>Mean:143.5 +/- 2.1 nm</div><div>Mode:115.1 +/- 3.6 nm</div><div>SD:60.9 +/- 1.3 nm</div><div>D10:84.5 +/- 2.7 nm</div><div>D50:130.9 +/- 1.4 nm</div><div>D90:216.1 +/- 4.6 nm</div></div><div>Concentration (Upgrade): 5.72e+11 +/- 1.52e+10 particles/ml<br/>43.0 +/- 1.2 particles/frame<br/>46.9 +/- 1.1 centres/frame</div></div> |
|-------------------------------------------------------------------------------------------------------------------------------------------------------------------------------------------------------------------------------------------------------------------------------------------------------------------------------------------------------------------------------------------------------------------------------------------------------------------------------------------------------------------------------------------------------------------------------------------------------------------------------------------------------------------------------------------------------------------------------------------------------------------------------------------------------------------------------------------------------------------------------------------------------------------------------------------------------------------------------------------------------------------------------------------------------------------------------------------------------------------------|----------------------------------------------------------------------------------------------------------------------------------------------------------------------------------------------------------------------------------------------------------------------------------------------------------------------------------------------------------------------------------------------------------------------------------------------------------------------------------------------------------------------------------------------------------------------------------------------------------------|

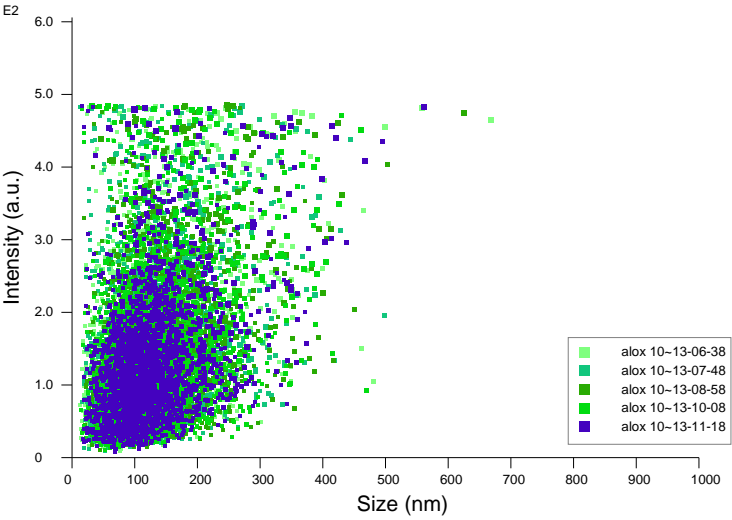

Intensity / Size graph for Experiment:  
alox 1000x 5 60 120 2025-07-24 13-03-39

**Script Used: (Full Text):**

SOP Standard Measurement 01-03-33PM 24Jul2025.txt
