# Supplementary material
Source: Research Square preprint supplement (doi:10.21203/rs.3.rs-9703493/v1)
Supplement: Supplementary file 10 [file Dpp4-rtTA3-DTR-H1-mKate2.pdf › NTA/UC/Dpp4-rtTA3-DTR-H1-mKate2.pdf]

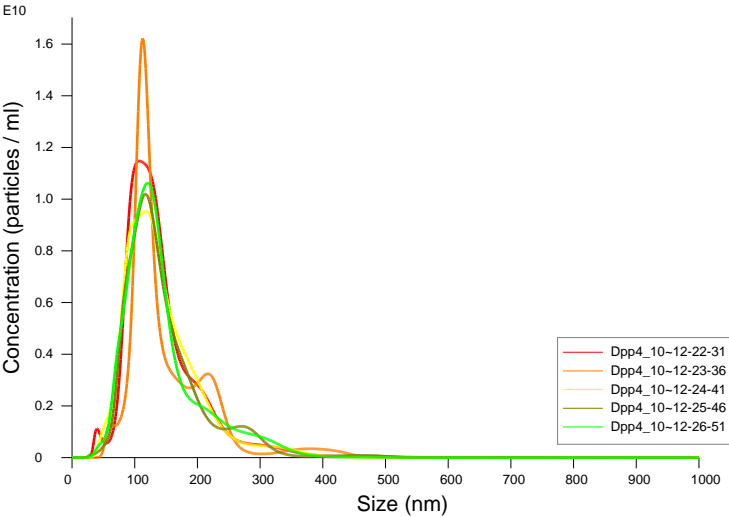

FTLA Concentration / Size graph for Experiment:  
Dpp4\_1000x 5 60 120\_2 2024-10-22 12-19-28

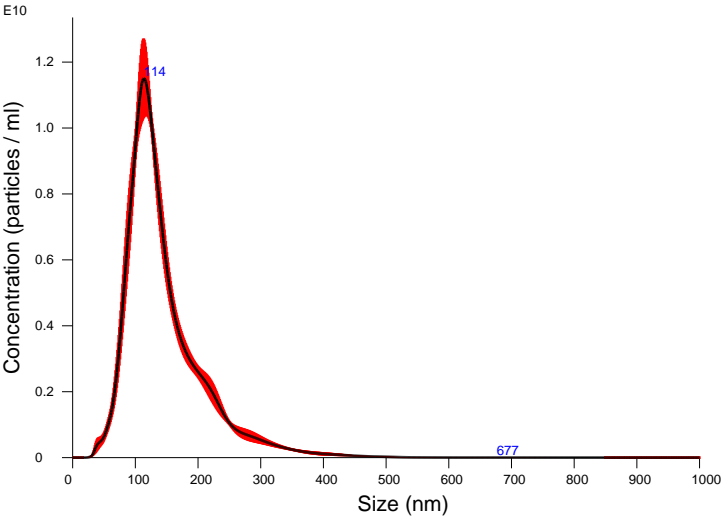

Averaged FTLA Concentration / Size for Experiment:  
Dpp4\_1000x 5 60 120\_2 2024-10-22 12-19-28  
Error bars indicate + / -1 standard error of the mean

Included Files

Dpp4\_1000x 5 60 120\_2 2024-10-22 12-22-31  
Dpp4\_1000x 5 60 120\_2 2024-10-22 12-23-36  
Dpp4\_1000x 5 60 120\_2 2024-10-22 12-24-41  
Dpp4\_1000x 5 60 120\_2 2024-10-22 12-25-46  
Dpp4\_1000x 5 60 120\_2 2024-10-22 12-26-51

Details

NTA Version: NTA 3.4 - Sample Assistant Build 3.4.4 - SA  
Script Used: SOP Standard Measurement 12-19-28PM 220~  
Time Captured: 12:19:28 22/10/2024  
Operator: Jitka NeburkovÆ  
Pre-treatment:  
Sample Name:  
Diluent:  
Remarks:

Capture Settings

Camera Type: sCMOS  
Laser Type: Blue405  
Camera Level: 12  
Slider Shutter: 1200  
Slider Gain: 146  
FPS: 25.0  
Number of Frames: 1498  
Temperature: 25.0 - 25.0 °C  
Viscosity: 1.0 cP  
Dilution factor: 1 x 10e3  
Syringe Pump Speed: 120

Analysis Settings

Detect Threshold: 5  
Blur Size: Auto  
Max Jump Distance: Auto: 16.0 - 18.0 pix

Results

Stats: Merged Data

Mean: 145.6 nm  
Mode: 113.8 nm  
SD: 64.2 nm  
D10: 86.2 nm  
D50: 128.3 nm  
D90: 227.4 nm

Stats: Mean +/- Standard Error

Mean: 145.8 +/- 1.6 nm  
Mode: 115.1 +/- 2.4 nm  
SD: 64.2 +/- 1.2 nm  
D10: 86.9 +/- 2.7 nm  
D50: 128.3 +/- 0.6 nm  
D90: 228.0 +/- 4.2 nm  
Concentration (Upgrade): 1.03e+12 +/- 2.46e+10 particles/ml  
75.0 +/- 1.4 particles/frame  
75.8 +/- 0.9 centres/frame

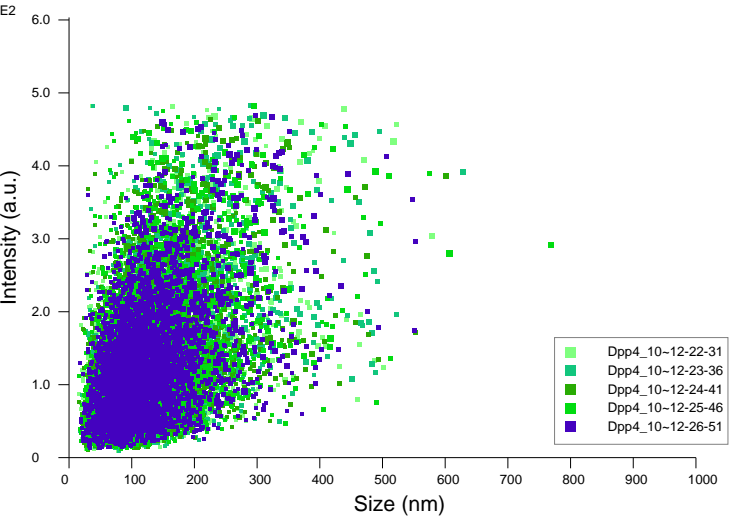

Script Used: (Full Text):

SOP Standard Measurement 12-19-28PM 22Oct2024.txt
