# Supplementary material
Source: Research Square preprint supplement (doi:10.21203/rs.3.rs-9703493/v1)
Supplement: Supplementary file 11 [file EGFP transposon.pdf › NTA/UC/EGFP transposon.pdf]

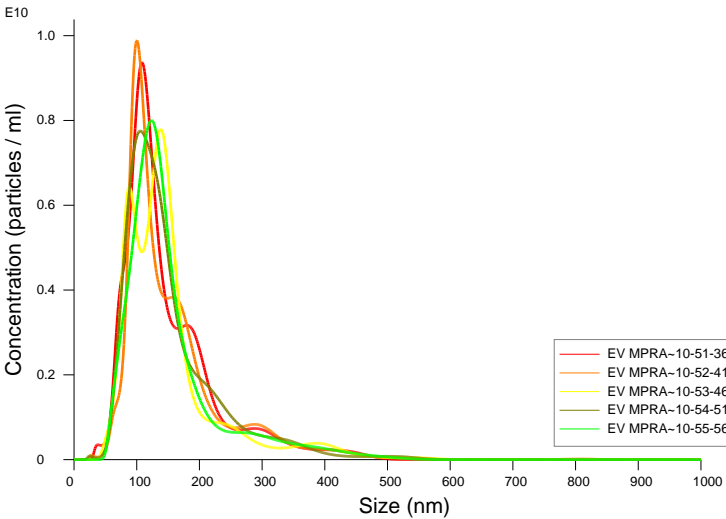

FTLA Concentration / Size graph for Experiment:  
EV MPRA GFP 1000x 5 60 120 2024-12-18 10-48-30

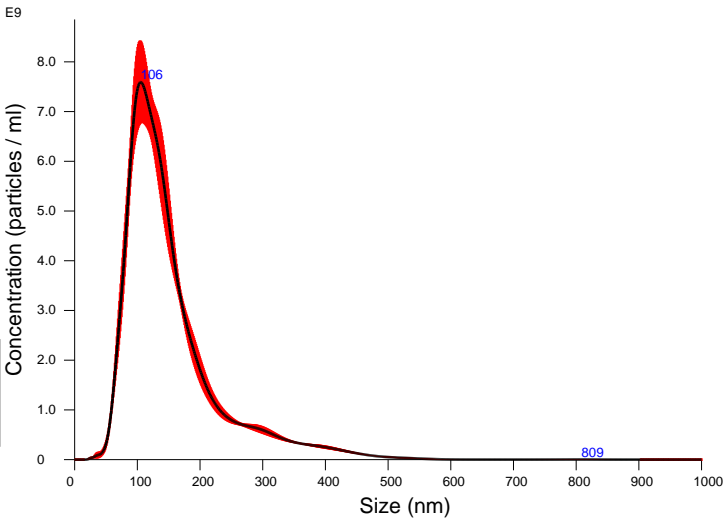

Averaged FTLA Concentration / Size for Experiment:  
EV MPRA GFP 1000x 5 60 120 2024-12-18 10-48-30  
Error bars indicate + / - 1 standard error of the mean

|                                                                                                                                                                                                                                                                                                                                                                                                                                                                                                                                                                                                                                                                                                                                                                                                                                                                                                                                                                                                                                                                                                                                                         |                                                                                                                                                                                                                                                                                                                                                                                                                                                                                                                                                                                             |
|---------------------------------------------------------------------------------------------------------------------------------------------------------------------------------------------------------------------------------------------------------------------------------------------------------------------------------------------------------------------------------------------------------------------------------------------------------------------------------------------------------------------------------------------------------------------------------------------------------------------------------------------------------------------------------------------------------------------------------------------------------------------------------------------------------------------------------------------------------------------------------------------------------------------------------------------------------------------------------------------------------------------------------------------------------------------------------------------------------------------------------------------------------|---------------------------------------------------------------------------------------------------------------------------------------------------------------------------------------------------------------------------------------------------------------------------------------------------------------------------------------------------------------------------------------------------------------------------------------------------------------------------------------------------------------------------------------------------------------------------------------------|
| <div>Included Files</div> <div>EV MPRA GFP 1000x 5 60 120 2024-12-18 10-51-36<br/>EV MPRA GFP 1000x 5 60 120 2024-12-18 10-52-41<br/>EV MPRA GFP 1000x 5 60 120 2024-12-18 10-53-46<br/>EV MPRA GFP 1000x 5 60 120 2024-12-18 10-54-51<br/>EV MPRA GFP 1000x 5 60 120 2024-12-18 10-55-56</div> <div>Details</div> <div><div>NTA Version:NTA 3.4 - Sample Assistant Build 3.4.4 - SA</div><div>Script Used:SOP Standard Measurement 10-48-01AM 18~</div><div>Time Captured:10:48:30 18/12/2024</div><div>Operator:Jitka</div><div>Pre-treatment:</div><div>Sample Name:</div><div>Diluent:pbs</div><div>Remarks:</div></div> <div>Capture Settings</div> <div><div>Camera Type:sCMOS</div><div>Laser Type:Blue405</div><div>Camera Level:12</div><div>Slider Shutter:1200</div><div>Slider Gain:146</div><div>FPS:25.0</div><div>Number of Frames:1498</div><div>Temperature:25.0 - 25.0 °C</div><div>Viscosity:1.0 cP</div><div>Dilution factor:1 x 10e3</div><div>Syringe Pump Speed:120</div></div> <div>Analysis Settings</div> <div><div>Detect Threshold:5</div><div>Blur Size:Auto</div><div>Max Jump Distance:Auto: 16.4 - 18.3 pix</div></div> | <div>Results</div> <div>Stats: Merged Data</div> <div><div>Mean:153.6 nm</div><div>Mode:105.4 nm</div><div>SD:79.2 nm</div><div>D10:84.2 nm</div><div>D50:131.2 nm</div><div>D90:259.5 nm</div></div> <div>Stats: Mean +/- Standard Error</div> <div><div>Mean:153.7 +/- 1.0 nm</div><div>Mode:115.3 +/- 6.9 nm</div><div>SD:79.2 +/- 1.2 nm</div><div>D10:84.2 +/- 1.4 nm</div><div>D50:130.9 +/- 1.4 nm</div><div>D90:259.8 +/- 4.1 nm</div></div> <div>Concentration (Upgrade): 8.12e+11 +/- 1.62e+10 particles/ml<br/>55.8 +/- 0.8 particles/frame<br/>57.7 +/- 0.6 centres/frame</div> |
|---------------------------------------------------------------------------------------------------------------------------------------------------------------------------------------------------------------------------------------------------------------------------------------------------------------------------------------------------------------------------------------------------------------------------------------------------------------------------------------------------------------------------------------------------------------------------------------------------------------------------------------------------------------------------------------------------------------------------------------------------------------------------------------------------------------------------------------------------------------------------------------------------------------------------------------------------------------------------------------------------------------------------------------------------------------------------------------------------------------------------------------------------------|---------------------------------------------------------------------------------------------------------------------------------------------------------------------------------------------------------------------------------------------------------------------------------------------------------------------------------------------------------------------------------------------------------------------------------------------------------------------------------------------------------------------------------------------------------------------------------------------|

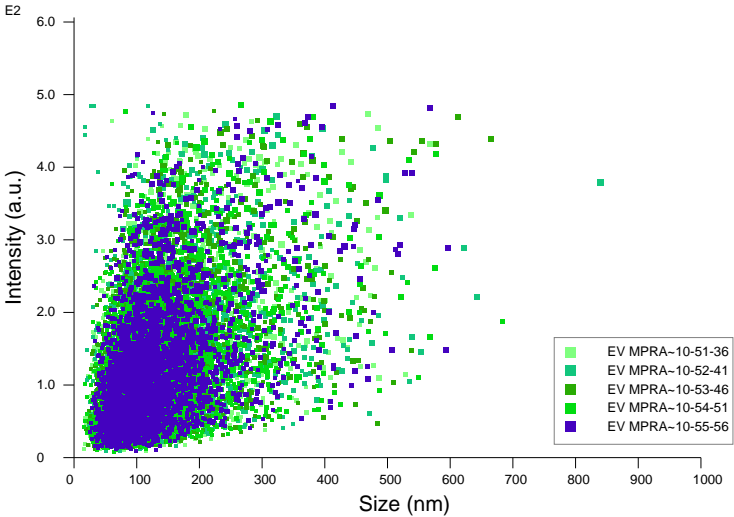

Intensity / Size graph for Experiment:  
EV MPRA GFP 1000x 5 60 120 2024-12-18 10-48-30

**Script Used: (Full Text):**

SOP Standard Measurement 10-48-01AM 18Dec2024.txt
