# Supplementary material
Source: Research Square preprint supplement (doi:10.21203/rs.3.rs-9703493/v1)
Supplement: Supplementary file 12 [file Hypertransposase.pdf › NTA/UC/Hypertransposase.pdf]

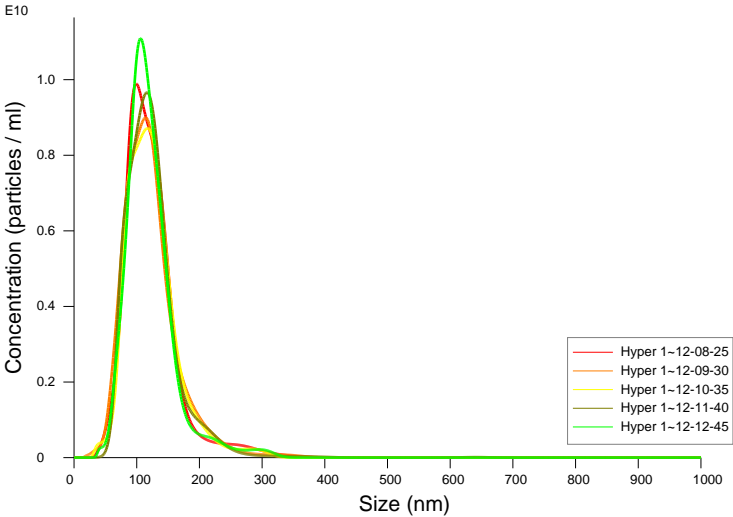

FTLA Concentration / Size graph for Experiment:  
Hyper 1 1000x 5 60 120 2024-10-30 12-05-24

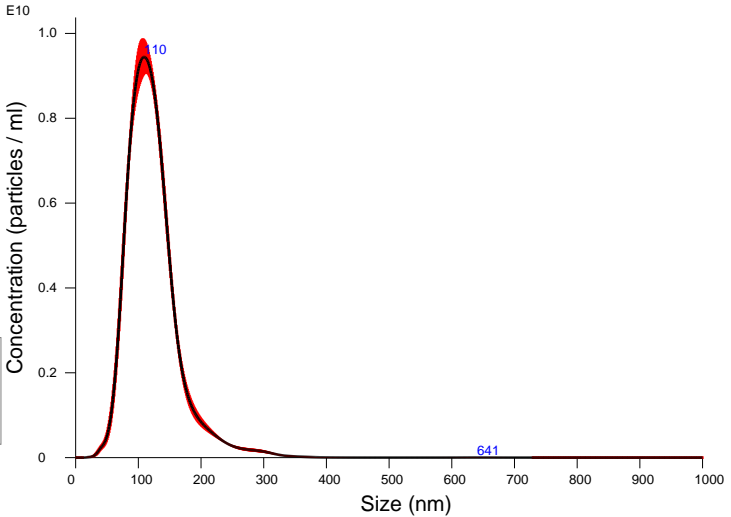

Averaged FTLA Concentration / Size for Experiment:  
Hyper 1 1000x 5 60 120 2024-10-30 12-05-24  
Error bars indicate + / - 1 standard error of the mean

|                                                                                                                                                                                                                                                                                                                                                                                                                                                                                                                                                                                                                                                                                                                                                                                                                                                                                                                                                                                                                                                                                                                                             |                                                                                                                                                                                                                                                                                                                                                                                                                                                                                                                                                                                             |
|---------------------------------------------------------------------------------------------------------------------------------------------------------------------------------------------------------------------------------------------------------------------------------------------------------------------------------------------------------------------------------------------------------------------------------------------------------------------------------------------------------------------------------------------------------------------------------------------------------------------------------------------------------------------------------------------------------------------------------------------------------------------------------------------------------------------------------------------------------------------------------------------------------------------------------------------------------------------------------------------------------------------------------------------------------------------------------------------------------------------------------------------|---------------------------------------------------------------------------------------------------------------------------------------------------------------------------------------------------------------------------------------------------------------------------------------------------------------------------------------------------------------------------------------------------------------------------------------------------------------------------------------------------------------------------------------------------------------------------------------------|
| <div>Included Files</div> <div>Hyper 1 1000x 5 60 120 2024-10-30 12-08-25<br/>Hyper 1 1000x 5 60 120 2024-10-30 12-09-30<br/>Hyper 1 1000x 5 60 120 2024-10-30 12-10-35<br/>Hyper 1 1000x 5 60 120 2024-10-30 12-11-40<br/>Hyper 1 1000x 5 60 120 2024-10-30 12-12-45</div> <div>Details</div> <div><div>NTA Version:NTA 3.4 - Sample Assistant Build 3.4.4 - SA</div><div>Script Used:SOP Standard Measurement 12-05-24PM 300~</div><div>Time Captured:12:05:24 30/10/2024</div><div>Operator:Jitka NeburkovÆ</div><div>Pre-treatment:</div><div>Sample Name:</div><div>Diluent:</div><div>Remarks:</div></div> <div>Capture Settings</div> <div><div>Camera Type:sCMOS</div><div>Laser Type:Blue405</div><div>Camera Level:12</div><div>Slider Shutter:1200</div><div>Slider Gain:146</div><div>FPS:25.0</div><div>Number of Frames:1498</div><div>Temperature:25.0 - 25.0 °C</div><div>Viscosity:1.0 cP</div><div>Dilution factor:1 x 10e3</div><div>Syringe Pump Speed:120</div></div> <div>Analysis Settings</div> <div><div>Detect Threshold:5</div><div>Blur Size:Auto</div><div>Max Jump Distance:Auto: 16.8 - 19.9 pix</div></div> | <div>Results</div> <div>Stats: Merged Data</div> <div><div>Mean:122.7 nm</div><div>Mode:109.3 nm</div><div>SD:42.6 nm</div><div>D10:79.1 nm</div><div>D50:116.2 nm</div><div>D90:170.2 nm</div></div> <div>Stats: Mean +/- Standard Error</div> <div><div>Mean:122.7 +/- 0.5 nm</div><div>Mode:110.6 +/- 3.5 nm</div><div>SD:42.5 +/- 0.7 nm</div><div>D10:79.2 +/- 1.0 nm</div><div>D50:116.3 +/- 0.8 nm</div><div>D90:170.1 +/- 2.1 nm</div></div> <div>Concentration (Upgrade): 7.85e+11 +/- 4.90e+09 particles/ml<br/>58.1 +/- 0.4 particles/frame<br/>60.4 +/- 0.7 centres/frame</div> |
|---------------------------------------------------------------------------------------------------------------------------------------------------------------------------------------------------------------------------------------------------------------------------------------------------------------------------------------------------------------------------------------------------------------------------------------------------------------------------------------------------------------------------------------------------------------------------------------------------------------------------------------------------------------------------------------------------------------------------------------------------------------------------------------------------------------------------------------------------------------------------------------------------------------------------------------------------------------------------------------------------------------------------------------------------------------------------------------------------------------------------------------------|---------------------------------------------------------------------------------------------------------------------------------------------------------------------------------------------------------------------------------------------------------------------------------------------------------------------------------------------------------------------------------------------------------------------------------------------------------------------------------------------------------------------------------------------------------------------------------------------|

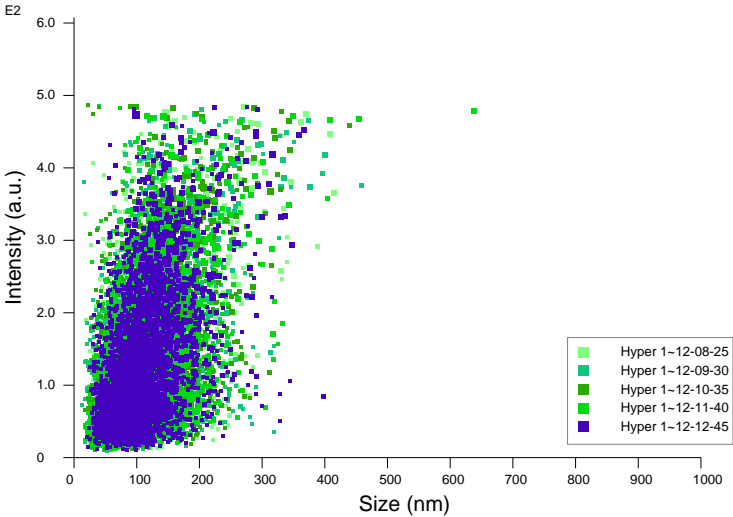

Intensity / Size graph for Experiment:  
Hyper 1 1000x 5 60 120 2024-10-30 12-05-24

**Script Used: (Full Text):**

SOP Standard Measurement 12-05-24PM 30Oct2024.txt
