# Supplementary material
Source: Research Square preprint supplement (doi:10.21203/rs.3.rs-9703493/v1)
Supplement: Supplementary file 13 [file Lck loxP2.pdf › NTA/UC/Lck loxP2.pdf]

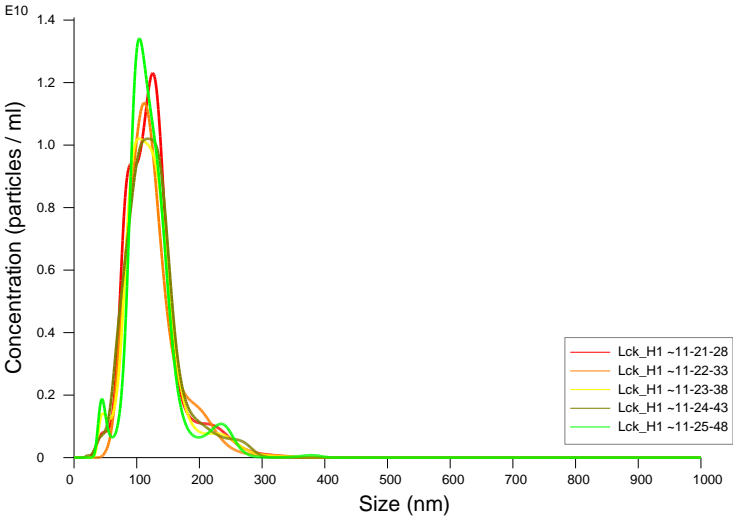

FTLA Concentration / Size graph for Experiment:  
Lck\_H1 1000x 5 60 120\_2 2024-10-22 11-18-18

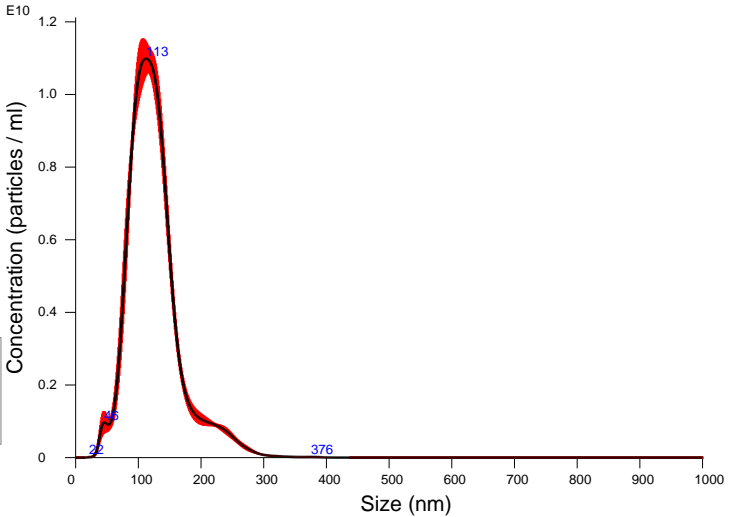

Averaged FTLA Concentration / Size for Experiment:  
Lck\_H1 1000x 5 60 120\_2 2024-10-22 11-18-18  
Error bars indicate + / - 1 standard error of the mean

|                                                                                                                                                                                                                                                                                                                                                                                                                                                                                                                                                                                                                                                                                                                                                                                                                                                                                                                                                                                                                                                                                                                                                                                       |                                                                                                                                                                                                                                                                                                                                                                                                                                                                                                                                                                                                                                    |
|---------------------------------------------------------------------------------------------------------------------------------------------------------------------------------------------------------------------------------------------------------------------------------------------------------------------------------------------------------------------------------------------------------------------------------------------------------------------------------------------------------------------------------------------------------------------------------------------------------------------------------------------------------------------------------------------------------------------------------------------------------------------------------------------------------------------------------------------------------------------------------------------------------------------------------------------------------------------------------------------------------------------------------------------------------------------------------------------------------------------------------------------------------------------------------------|------------------------------------------------------------------------------------------------------------------------------------------------------------------------------------------------------------------------------------------------------------------------------------------------------------------------------------------------------------------------------------------------------------------------------------------------------------------------------------------------------------------------------------------------------------------------------------------------------------------------------------|
| <div><div>Included Files</div><div>Lck_H1 1000x 5 60 120_2 2024-10-22 11-21-28<br/>Lck_H1 1000x 5 60 120_2 2024-10-22 11-22-33<br/>Lck_H1 1000x 5 60 120_2 2024-10-22 11-23-38<br/>Lck_H1 1000x 5 60 120_2 2024-10-22 11-24-43<br/>Lck_H1 1000x 5 60 120_2 2024-10-22 11-25-48</div><div><div>Details</div><div><div>NTA Version:NTA 3.4 - Sample Assistant Build 3.4.4 - SA</div><div>Script Used:SOP Standard Measurement 11-18-18AM 220~</div><div>Time Captured:11:18:18 22/10/2024</div><div>Operator:Jitka NeburkovÆ</div><div>Pre-treatment:</div><div>Sample Name:</div><div>Diluent:</div><div>Remarks:</div></div><div><div>Capture Settings</div><div><div>Camera Type:sCMOS</div><div>Laser Type:Blue405</div><div>Camera Level:12</div><div>Slider Shutter:1200</div><div>Slider Gain:146</div><div>FPS:25.0</div><div>Number of Frames:1498</div><div>Temperature:25.0 - 25.0 °C</div><div>Viscosity:1.0 cP</div><div>Dilution factor:1 x 10e3</div><div>Syringe Pump Speed:120</div></div><div><div>Analysis Settings</div><div><div>Detect Threshold:5</div><div>Blur Size:Auto</div><div>Max Jump Distance:Auto: 16.8 - 19.3 pix</div></div></div></div></div></div> | <div><div>Results</div><div><div>Stats: Merged Data</div><div><div>Mean:124.9 nm</div><div>Mode:112.4 nm</div><div>SD:42.6 nm</div><div>D10:81.1 nm</div><div>D50:118.6 nm</div><div>D90:175.5 nm</div></div><div><div>Stats: Mean +/- Standard Error</div><div><div>Mean:124.9 +/- 0.3 nm</div><div>Mode:112.7 +/- 4.1 nm</div><div>SD:42.5 +/- 0.3 nm</div><div>D10:81.3 +/- 1.5 nm</div><div>D50:118.7 +/- 0.6 nm</div><div>D90:175.1 +/- 2.4 nm</div><div>Concentration (Upgrade):9.12e+11 +/- 2.13e+10 particles/ml</div><div>63.2 +/- 1.6 particles/frame</div><div>64.5 +/- 1.2 centres/frame</div></div></div></div></div> |
|---------------------------------------------------------------------------------------------------------------------------------------------------------------------------------------------------------------------------------------------------------------------------------------------------------------------------------------------------------------------------------------------------------------------------------------------------------------------------------------------------------------------------------------------------------------------------------------------------------------------------------------------------------------------------------------------------------------------------------------------------------------------------------------------------------------------------------------------------------------------------------------------------------------------------------------------------------------------------------------------------------------------------------------------------------------------------------------------------------------------------------------------------------------------------------------|------------------------------------------------------------------------------------------------------------------------------------------------------------------------------------------------------------------------------------------------------------------------------------------------------------------------------------------------------------------------------------------------------------------------------------------------------------------------------------------------------------------------------------------------------------------------------------------------------------------------------------|

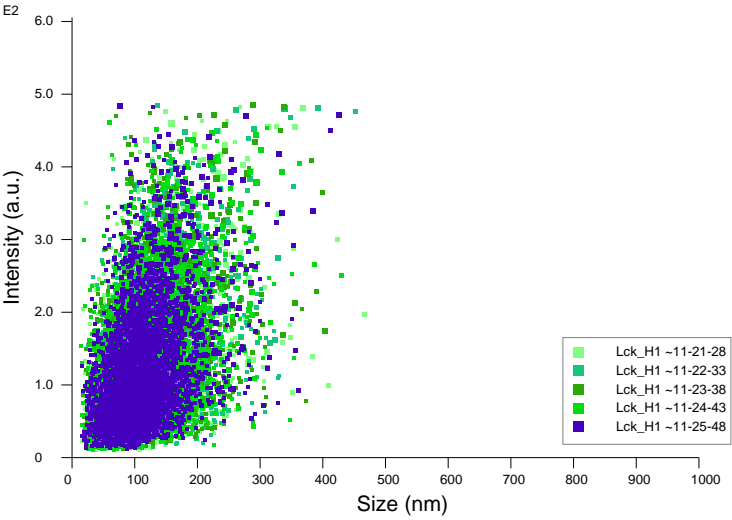

Intensity / Size graph for Experiment:  
Lck\_H1 1000x 5 60 120\_2 2024-10-22 11-18-18

**Script Used: (Full Text):**

SOP Standard Measurement 11-18-18AM 22Oct2024.txt
