# Supplementary material
Source: Research Square preprint supplement (doi:10.21203/rs.3.rs-9703493/v1)
Supplement: Supplementary file 14 [file Lyve1NCre-NGFP.pdf › NTA/UC/Lyve1NCre-NGFP.pdf]

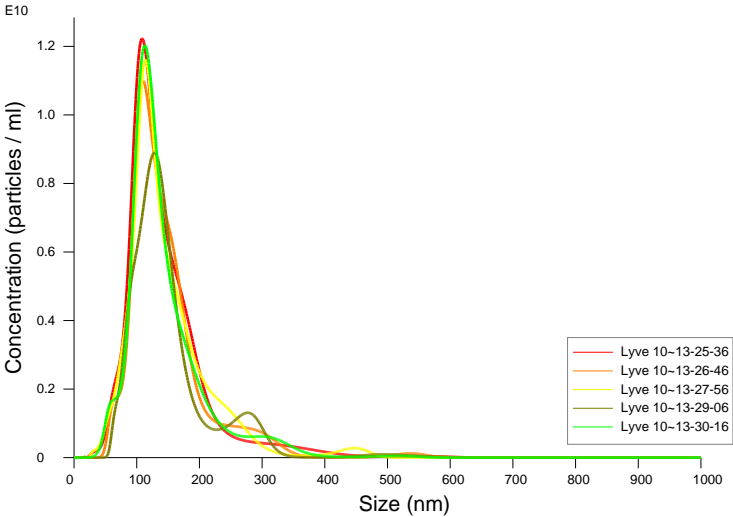

FTLA Concentration / Size graph for Experiment:  
Lyve 1000x 5 60 120 2025-07-24 13-22-11

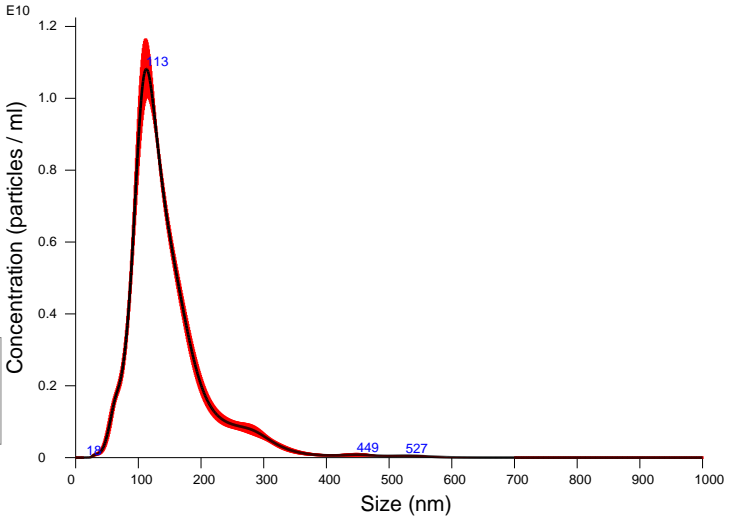

Averaged FTLA Concentration / Size for Experiment:  
Lyve 1000x 5 60 120 2025-07-24 13-22-11  
Error bars indicate + / -1 standard error of the mean

|                                                                                                                                                                                                                                                                                                                                                                                                                                                                                                                                                                                                                                                                                                                                                                                                                                                                                                                                                                                                                                                                                                                                                       |                                                                                                                                                                                                                                                                                                                                                                                                                                                                                                                                                                                                                                    |
|-------------------------------------------------------------------------------------------------------------------------------------------------------------------------------------------------------------------------------------------------------------------------------------------------------------------------------------------------------------------------------------------------------------------------------------------------------------------------------------------------------------------------------------------------------------------------------------------------------------------------------------------------------------------------------------------------------------------------------------------------------------------------------------------------------------------------------------------------------------------------------------------------------------------------------------------------------------------------------------------------------------------------------------------------------------------------------------------------------------------------------------------------------|------------------------------------------------------------------------------------------------------------------------------------------------------------------------------------------------------------------------------------------------------------------------------------------------------------------------------------------------------------------------------------------------------------------------------------------------------------------------------------------------------------------------------------------------------------------------------------------------------------------------------------|
| <div><div>Included Files</div><div>Lyve 1000x 5 60 120 2025-07-24 13-25-36<br/>Lyve 1000x 5 60 120 2025-07-24 13-26-46<br/>Lyve 1000x 5 60 120 2025-07-24 13-27-56<br/>Lyve 1000x 5 60 120 2025-07-24 13-29-06<br/>Lyve 1000x 5 60 120 2025-07-24 13-30-16</div><div><div>Details</div><div><div>NTA Version:NTA 3.4 - Sample Assistant Build 3.4.4 - SA</div><div>Script Used:SOP Standard Measurement 01-21-53PM 24J~</div><div>Time Captured:13:22:11 24/07/2025</div><div>Operator:jitka</div><div>Pre-treatment:</div><div>Sample Name:</div><div>Diluent:water</div><div>Remarks:</div></div></div><div><div>Capture Settings</div><div><div>Camera Type:sCMOS</div><div>Laser Type:Blue405</div><div>Camera Level:12</div><div>Slider Shutter:1200</div><div>Slider Gain:146</div><div>FPS:25.0</div><div>Number of Frames:1498</div><div>Temperature:25.0 °C</div><div>Viscosity:1.0 cP</div><div>Dilution factor:1 x 10e3</div><div>Syringe Pump Speed:120</div></div></div><div><div>Analysis Settings</div><div><div>Detect Threshold:5</div><div>Blur Size:Auto</div><div>Max Jump Distance:Auto: 15.6 - 18.8 pix</div></div></div></div> | <div><div>Results</div><div><div>Stats: Merged Data</div><div><div>Mean:147.2 nm</div><div>Mode:112.8 nm</div><div>SD:66.5 nm</div><div>D10:89.0 nm</div><div>D50:130.3 nm</div><div>D90:227.6 nm</div></div></div><div><div>Stats: Mean +/- Standard Error</div><div><div>Mean:147.4 +/- 1.3 nm</div><div>Mode:114.8 +/- 3.5 nm</div><div>SD:66.5 +/- 0.8 nm</div><div>D10:89.1 +/- 1.0 nm</div><div>D50:130.4 +/- 1.4 nm</div><div>D90:229.1 +/- 6.5 nm</div><div>Concentration (Upgrade):9.56e+11 +/- 3.83e+10 particles/ml</div><div>68.0 +/- 2.4 particles/frame</div><div>70.3 +/- 1.5 centres/frame</div></div></div></div> |
|-------------------------------------------------------------------------------------------------------------------------------------------------------------------------------------------------------------------------------------------------------------------------------------------------------------------------------------------------------------------------------------------------------------------------------------------------------------------------------------------------------------------------------------------------------------------------------------------------------------------------------------------------------------------------------------------------------------------------------------------------------------------------------------------------------------------------------------------------------------------------------------------------------------------------------------------------------------------------------------------------------------------------------------------------------------------------------------------------------------------------------------------------------|------------------------------------------------------------------------------------------------------------------------------------------------------------------------------------------------------------------------------------------------------------------------------------------------------------------------------------------------------------------------------------------------------------------------------------------------------------------------------------------------------------------------------------------------------------------------------------------------------------------------------------|

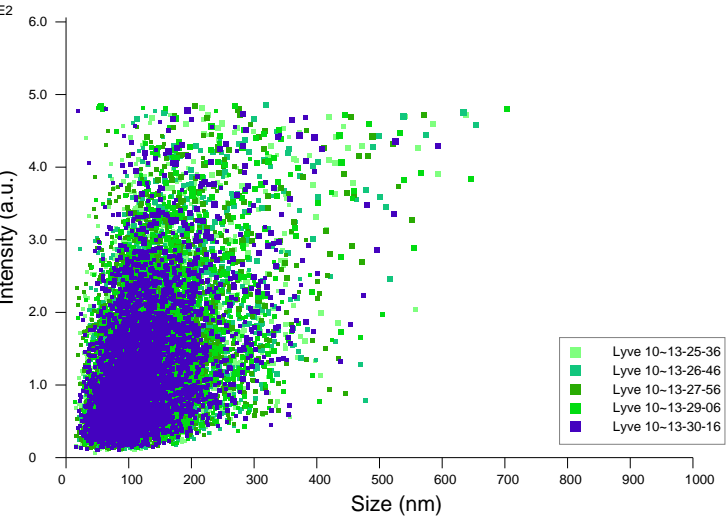

Intensity / Size graph for Experiment:  
Lyve 1000x 5 60 120 2025-07-24 13-22-11

**Script Used: (Full Text):**

SOP Standard Measurement 01-21-53PM 24Jul2025.txt
