# Supplementary material
Source: Research Square preprint supplement (doi:10.21203/rs.3.rs-9703493/v1)
Supplement: Supplementary file 15 [file Muc1_Muc1_FS 5 60 120 500x 2026-03-09 12-41-52-ExperimentReport.pdf › NTA/UC/Muc1_Muc1_FS 5 60 120 500x 2026-03-09 12-41-52-ExperimentReport.pdf]

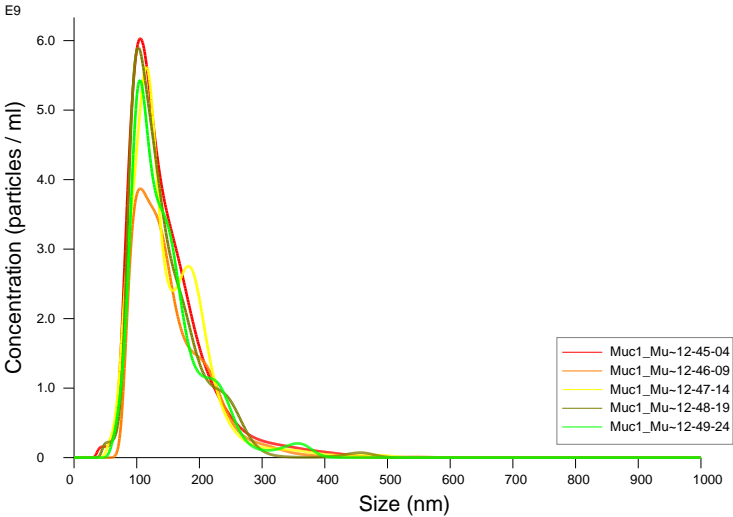

FTLA Concentration / Size graph for Experiment:  
Muc1\_Muc1\_FS 5 60 120 500x 2026-03-09 12-41-52

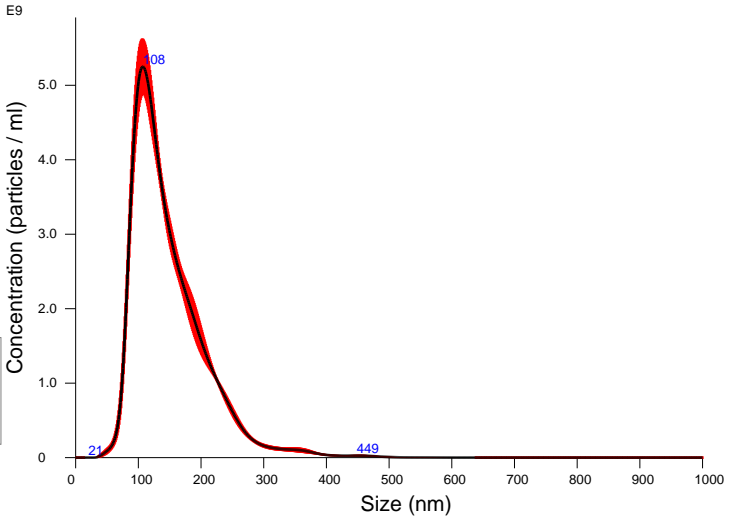

Averaged FTLA Concentration / Size for Experiment:  
Muc1\_Muc1\_FS 5 60 120 500x 2026-03-09 12-41-52  
Error bars indicate + / - 1 standard error of the mean

|                                                                                                                                                                                                                                                                                                                                                                                                                                                                                                                                                                                                                                                                                                                                                                                                                                                                                                                                                                                                                                                                                                                                                               |                                                                                                                                                                                                                                                                                                                                                                                                                                                                                                                                                                                                       |
|---------------------------------------------------------------------------------------------------------------------------------------------------------------------------------------------------------------------------------------------------------------------------------------------------------------------------------------------------------------------------------------------------------------------------------------------------------------------------------------------------------------------------------------------------------------------------------------------------------------------------------------------------------------------------------------------------------------------------------------------------------------------------------------------------------------------------------------------------------------------------------------------------------------------------------------------------------------------------------------------------------------------------------------------------------------------------------------------------------------------------------------------------------------|-------------------------------------------------------------------------------------------------------------------------------------------------------------------------------------------------------------------------------------------------------------------------------------------------------------------------------------------------------------------------------------------------------------------------------------------------------------------------------------------------------------------------------------------------------------------------------------------------------|
| <div>Included Files</div> <div>Muc1_Muc1_FS 5 60 120 500x 2026-03-09 12-45-04<br/>Muc1_Muc1_FS 5 60 120 500x 2026-03-09 12-46-09<br/>Muc1_Muc1_FS 5 60 120 500x 2026-03-09 12-47-14<br/>Muc1_Muc1_FS 5 60 120 500x 2026-03-09 12-48-19<br/>Muc1_Muc1_FS 5 60 120 500x 2026-03-09 12-49-24</div> <div>Details</div> <div><div>NTA Version:NTA 3.4 - Sample Assistant Build 3.4.4 - SA</div><div>Script Used:SOP Standard Measurement 12-41-49PM 09~</div><div>Time Captured:12:41:52 09/03/2026</div><div>Operator:jitka</div><div>Pre-treatment:500x</div><div>Sample Name:FS</div><div>Diluent:pbs</div><div>Remarks:</div></div> <div>Capture Settings</div> <div><div>Camera Type:sCMOS</div><div>Laser Type:Blue405</div><div>Camera Level:12</div><div>Slider Shutter:1200</div><div>Slider Gain:146</div><div>FPS:25.0</div><div>Number of Frames:1498</div><div>Temperature:25.0 - 25.0 °C</div><div>Viscosity:1.0 cP</div><div>Dilution factor:5 x 10e2</div><div>Syringe Pump Speed:120</div></div> <div>Analysis Settings</div> <div><div>Detect Threshold:5</div><div>Blur Size:Auto</div><div>Max Jump Distance:Auto: 14.8 - 16.6 pix</div></div> | <div>Results</div> <div>Stats: Merged Data</div> <div><div>Mean:148.6 nm</div><div>Mode:107.2 nm</div><div>SD:59.3 nm</div><div>D10:91.1 nm</div><div>D50:133.4 nm</div><div>D90:224.4 nm</div></div> <div>Stats: Mean +/- Standard Error</div> <div><div>Mean:148.8 +/- 1.4 nm</div><div>Mode:106.9 +/- 2.2 nm</div><div>SD:59.1 +/- 0.8 nm</div><div>D10:91.2 +/- 0.9 nm</div><div>D50:133.7 +/- 1.6 nm</div><div>D90:224.5 +/- 1.9 nm</div><div>Concentration (Upgrade):5.03e+11 +/- 2.75e+10 particles/ml</div><div>79.1 +/- 4.5 particles/frame</div><div>79.5 +/- 3.6 centres/frame</div></div> |
|---------------------------------------------------------------------------------------------------------------------------------------------------------------------------------------------------------------------------------------------------------------------------------------------------------------------------------------------------------------------------------------------------------------------------------------------------------------------------------------------------------------------------------------------------------------------------------------------------------------------------------------------------------------------------------------------------------------------------------------------------------------------------------------------------------------------------------------------------------------------------------------------------------------------------------------------------------------------------------------------------------------------------------------------------------------------------------------------------------------------------------------------------------------|-------------------------------------------------------------------------------------------------------------------------------------------------------------------------------------------------------------------------------------------------------------------------------------------------------------------------------------------------------------------------------------------------------------------------------------------------------------------------------------------------------------------------------------------------------------------------------------------------------|

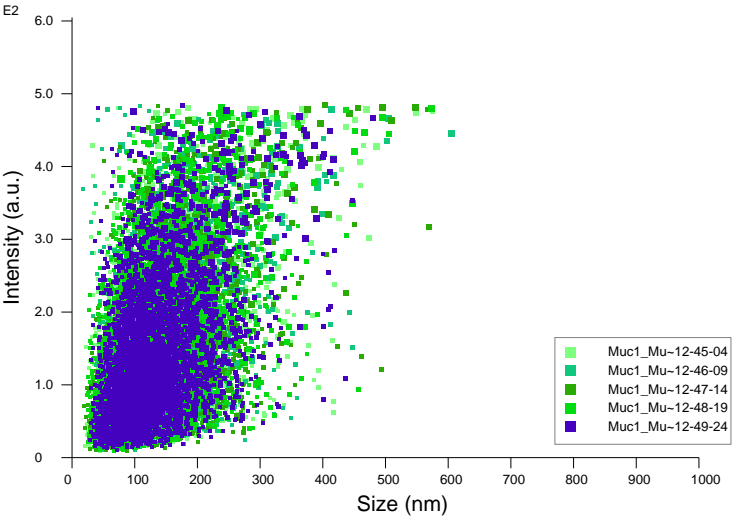

Intensity / Size graph for Experiment:  
Muc1\_Muc1\_FS 5 60 120 500x 2026-03-09 12-41-52

**Script Used: (Full Text):**

SOP Standard Measurement 12-41-49PM 09Mar2026.txt
