# Supplementary material
Source: Research Square preprint supplement (doi:10.21203/rs.3.rs-9703493/v1)
Supplement: Supplementary file 16 [file Muc1_Muc1_WT 5 60 120 1000x 2026-03-09 12-56-12-ExperimentReport.pdf › NTA/UC/Muc1_Muc1_WT 5 60 120 1000x 2026-03-09 12-56-12-ExperimentReport.pdf]

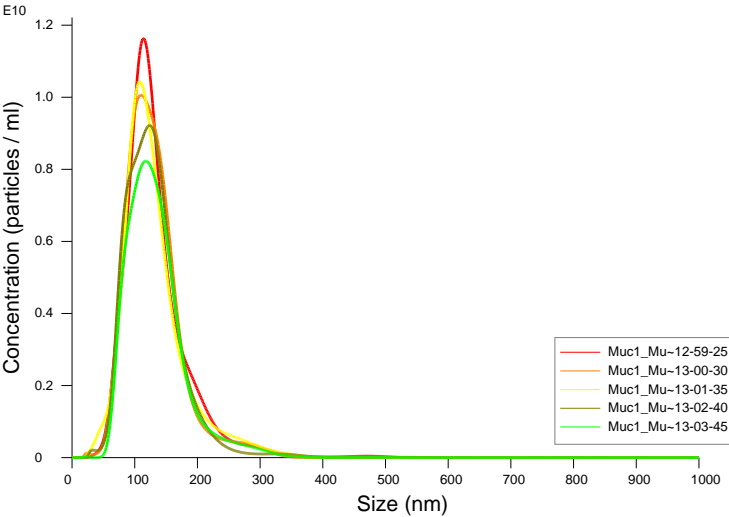

FTLA Concentration / Size graph for Experiment:  
Muc1\_Muc1\_WT 5 60 120 1000x 2026-03-09 12-56-12

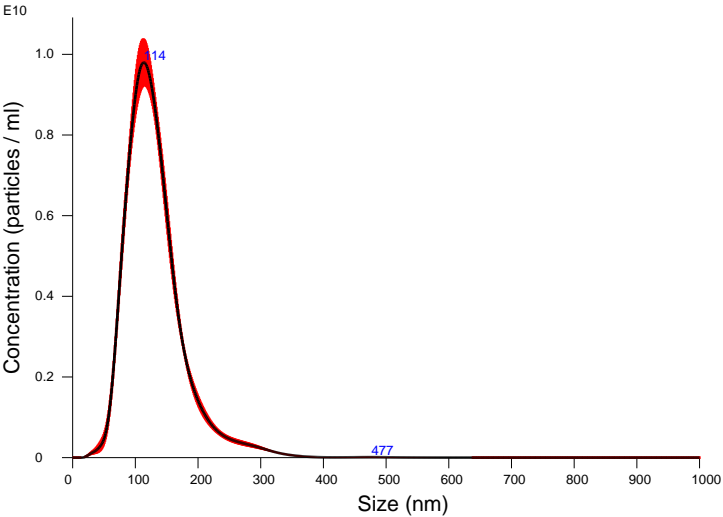

Averaged FTLA Concentration / Size for Experiment:  
Muc1\_Muc1\_WT 5 60 120 1000x 2026-03-09 12-56-12  
Error bars indicate + / - 1 standard error of the mean

|                                                                                                                                                                                                                                                                                                                                                                                                                                                                                                                                                                                                                                                                                                                                                                                                                                                                                                                                                                                                                                                                                                                                                                                                          |                                                                                                                                                                                                                                                                                                                                                                                                                                                                                                                                                                                                                                    |
|----------------------------------------------------------------------------------------------------------------------------------------------------------------------------------------------------------------------------------------------------------------------------------------------------------------------------------------------------------------------------------------------------------------------------------------------------------------------------------------------------------------------------------------------------------------------------------------------------------------------------------------------------------------------------------------------------------------------------------------------------------------------------------------------------------------------------------------------------------------------------------------------------------------------------------------------------------------------------------------------------------------------------------------------------------------------------------------------------------------------------------------------------------------------------------------------------------|------------------------------------------------------------------------------------------------------------------------------------------------------------------------------------------------------------------------------------------------------------------------------------------------------------------------------------------------------------------------------------------------------------------------------------------------------------------------------------------------------------------------------------------------------------------------------------------------------------------------------------|
| <div><div>Included Files</div><div>Muc1_Muc1_WT 5 60 120 1000x 2026-03-09 12-59-25<br/>Muc1_Muc1_WT 5 60 120 1000x 2026-03-09 13-00-30<br/>Muc1_Muc1_WT 5 60 120 1000x 2026-03-09 13-01-35<br/>Muc1_Muc1_WT 5 60 120 1000x 2026-03-09 13-02-40<br/>Muc1_Muc1_WT 5 60 120 1000x 2026-03-09 13-03-45</div><div><div>Details</div><div><div>NTA Version:NTA 3.4 - Sample Assistant Build 3.4.4 - SA</div><div>Script Used:SOP Standard Measurement 12-56-10PM 09~</div><div>Time Captured:12:56:12 09/03/2026</div><div>Operator:jitka</div><div>Pre-treatment:1000x</div><div>Sample Name:WT</div><div>Diluent:pbs</div><div>Remarks:</div></div><div><div>Capture Settings</div><div><div>Camera Type:sCMOS</div><div>Laser Type:Blue405</div><div>Camera Level:12</div><div>Slider Shutter:1200</div><div>Slider Gain:146</div><div>FPS:25.0</div><div>Number of Frames:1498</div><div>Temperature:25.0 - 25.0 °C</div><div>Viscosity:1.0 cP</div><div>Dilution factor:1 x 10e3</div><div>Syringe Pump Speed:120</div></div></div><div><div>Analysis Settings</div><div><div>Detect Threshold:5</div><div>Blur Size:Auto</div><div>Max Jump Distance:Auto: 16.3 - 19.9 pix</div></div></div></div></div> | <div><div>Results</div><div><div>Stats: Merged Data</div><div><div>Mean:131.0 nm</div><div>Mode:113.5 nm</div><div>SD:48.3 nm</div><div>D10:81.7 nm</div><div>D50:122.8 nm</div><div>D90:187.3 nm</div></div></div><div><div>Stats: Mean +/- Standard Error</div><div><div>Mean:131.0 +/- 0.9 nm</div><div>Mode:114.7 +/- 2.8 nm</div><div>SD:48.1 +/- 1.4 nm</div><div>D10:81.8 +/- 0.7 nm</div><div>D50:122.9 +/- 0.9 nm</div><div>D90:187.6 +/- 3.3 nm</div><div>Concentration (Upgrade):8.88e+11 +/- 2.59e+10 particles/ml</div><div>65.6 +/- 1.8 particles/frame</div><div>66.0 +/- 1.0 centres/frame</div></div></div></div> |
|----------------------------------------------------------------------------------------------------------------------------------------------------------------------------------------------------------------------------------------------------------------------------------------------------------------------------------------------------------------------------------------------------------------------------------------------------------------------------------------------------------------------------------------------------------------------------------------------------------------------------------------------------------------------------------------------------------------------------------------------------------------------------------------------------------------------------------------------------------------------------------------------------------------------------------------------------------------------------------------------------------------------------------------------------------------------------------------------------------------------------------------------------------------------------------------------------------|------------------------------------------------------------------------------------------------------------------------------------------------------------------------------------------------------------------------------------------------------------------------------------------------------------------------------------------------------------------------------------------------------------------------------------------------------------------------------------------------------------------------------------------------------------------------------------------------------------------------------------|

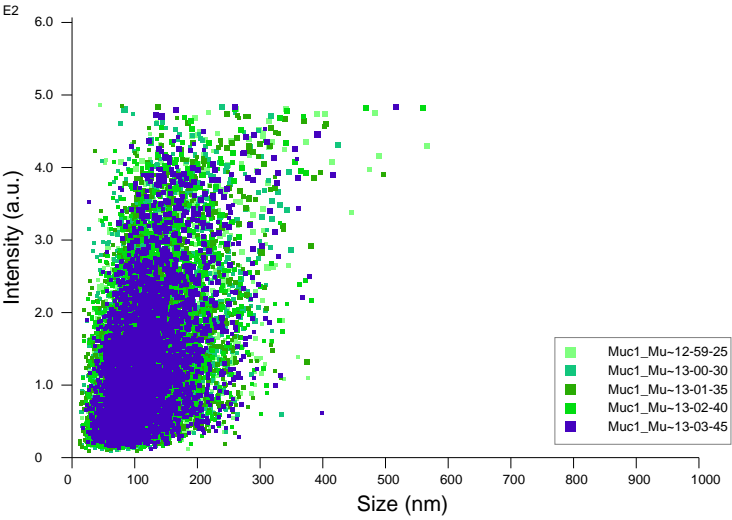

**Script Used: (Full Text):**

SOP Standard Measurement 12-56-10PM 09Mar2026.txt
