# Supplementary material
Source: Research Square preprint supplement (doi:10.21203/rs.3.rs-9703493/v1)
Supplement: Supplementary file 17 [file Nes-rtTA3-DTR-IRES-iRFP670.pdf › NTA/UC/Nes-rtTA3-DTR-IRES-iRFP670.pdf]

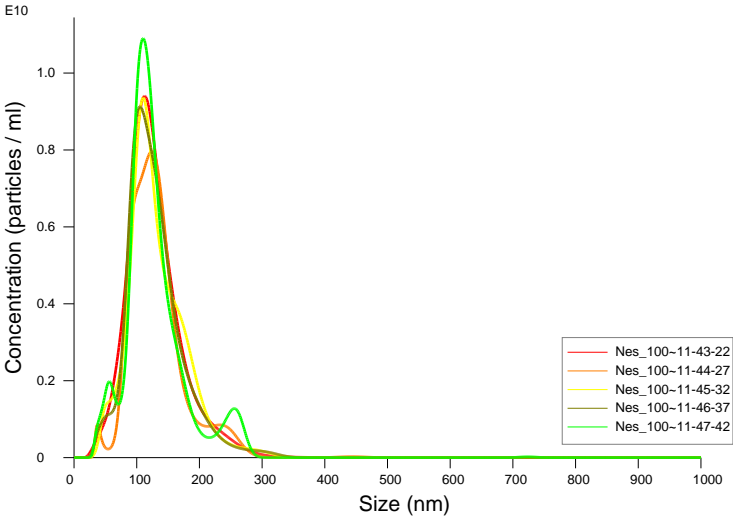

FTLA Concentration / Size graph for Experiment:  
Nes\_1000x 5 60120 2024-10-22 11-40-17

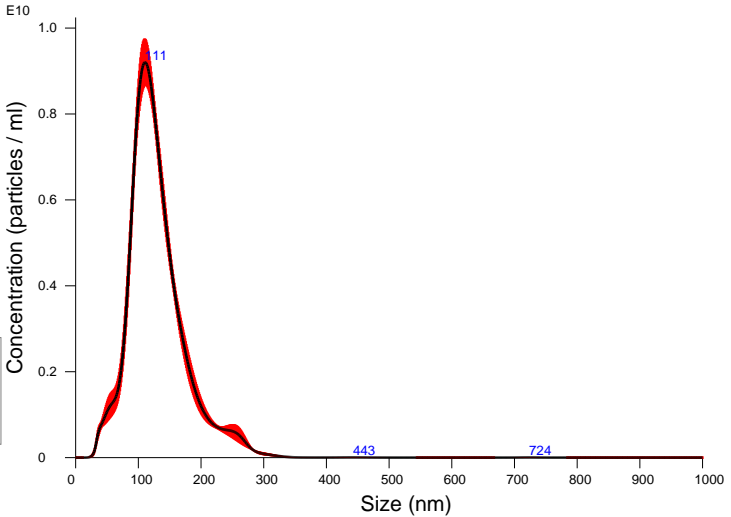

Averaged FTLA Concentration / Size for Experiment:  
Nes\_1000x 5 60120 2024-10-22 11-40-17  
Error bars indicate + / - 1 standard error of the mean

|                                                                                                                                                                                                                                                                                                                                                                                                                                                                                                                                                                                                                                                                                                                                                                                                                                                                                                                                                                                                                                                                                                                                                                                                                                                                                                                                                                                                                                                                                                                                                                                                                                                                                                                                                                                                       |
|-------------------------------------------------------------------------------------------------------------------------------------------------------------------------------------------------------------------------------------------------------------------------------------------------------------------------------------------------------------------------------------------------------------------------------------------------------------------------------------------------------------------------------------------------------------------------------------------------------------------------------------------------------------------------------------------------------------------------------------------------------------------------------------------------------------------------------------------------------------------------------------------------------------------------------------------------------------------------------------------------------------------------------------------------------------------------------------------------------------------------------------------------------------------------------------------------------------------------------------------------------------------------------------------------------------------------------------------------------------------------------------------------------------------------------------------------------------------------------------------------------------------------------------------------------------------------------------------------------------------------------------------------------------------------------------------------------------------------------------------------------------------------------------------------------|
| <div><div>Included Files</div><div>Nes_1000x 5 60120 2024-10-22 11-43-22<br/>Nes_1000x 5 60120 2024-10-22 11-44-27<br/>Nes_1000x 5 60120 2024-10-22 11-45-32<br/>Nes_1000x 5 60120 2024-10-22 11-46-37<br/>Nes_1000x 5 60120 2024-10-22 11-47-42</div><div><div>Details</div><div><div>NTA Version:NTA 3.4 - Sample Assistant Build 3.4.4 - SA</div><div>Script Used:SOP Standard Measurement 11-40-17AM 220~</div><div>Time Captured:11:40:17 22/10/2024</div><div>Operator:Jitka NeburkovÆ</div><div>Pre-treatment:</div><div>Sample Name:</div><div>Diluent:</div><div>Remarks:</div></div><div><div>Capture Settings</div><div><div>Camera Type:sCMOS</div><div>Laser Type:Blue405</div><div>Camera Level:12</div><div>Slider Shutter:1200</div><div>Slider Gain:146</div><div>FPS:25.0</div><div>Number of Frames:1498</div><div>Temperature:25.0 - 25.0 °C</div><div>Viscosity:1.0 cP</div><div>Dilution factor:1 x 10e3</div><div>Syringe Pump Speed:120</div></div><div><div>Analysis Settings</div><div><div>Detect Threshold:5</div><div>Blur Size:Auto</div><div>Max Jump Distance:Auto: 18.9 - 20.4 pix</div></div></div></div><div><div>Results</div><div><div>Stats: Merged Data</div><div><div>Mean:129.7 nm</div><div>Mode:110.7 nm</div><div>SD:46.4 nm</div><div>D10:82.8 nm</div><div>D50:121.7 nm</div><div>D90:187.8 nm</div></div><div><div>Stats: Mean +/- Standard Error</div><div><div>Mean:129.7 +/- 0.8 nm</div><div>Mode:112.5 +/- 3.1 nm</div><div>SD:46.3 +/- 1.2 nm</div><div>D10:82.7 +/- 1.0 nm</div><div>D50:121.8 +/- 0.9 nm</div><div>D90:187.8 +/- 1.2 nm</div></div><div><div>Concentration (Upgrade): 7.52e+11 +/- 1.97e+10 particles/ml</div><div>54.6 +/- 1.5 particles/frame</div><div>56.4 +/- 1.2 centres/frame</div></div></div></div></div></div></div> |
|-------------------------------------------------------------------------------------------------------------------------------------------------------------------------------------------------------------------------------------------------------------------------------------------------------------------------------------------------------------------------------------------------------------------------------------------------------------------------------------------------------------------------------------------------------------------------------------------------------------------------------------------------------------------------------------------------------------------------------------------------------------------------------------------------------------------------------------------------------------------------------------------------------------------------------------------------------------------------------------------------------------------------------------------------------------------------------------------------------------------------------------------------------------------------------------------------------------------------------------------------------------------------------------------------------------------------------------------------------------------------------------------------------------------------------------------------------------------------------------------------------------------------------------------------------------------------------------------------------------------------------------------------------------------------------------------------------------------------------------------------------------------------------------------------------|

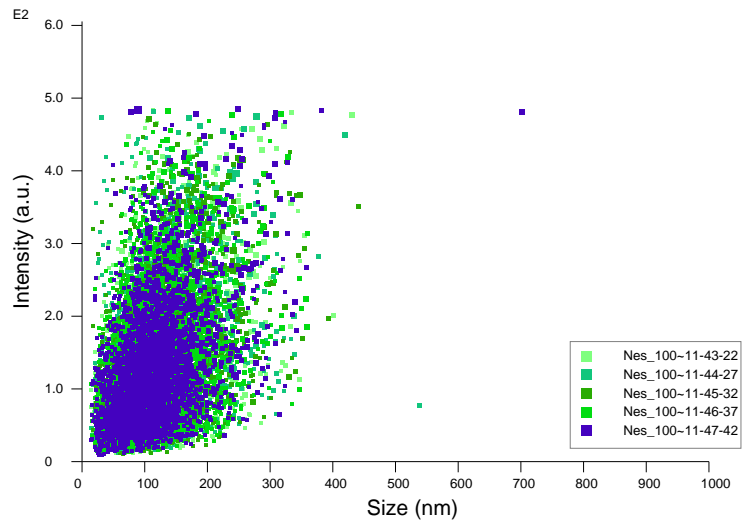

Intensity / Size graph for Experiment:  
Nes\_1000x 5 60120 2024-10-22 11-40-17

**Script Used: (Full Text):**

SOP Standard Measurement 11-40-17AM 22Oct2024.txt
