# Supplementary material
Source: Research Square preprint supplement (doi:10.21203/rs.3.rs-9703493/v1)
Supplement: Supplementary file 19 [file Sox2-mStrawberry.pdf › NTA/UC/Sox2-mStrawberry.pdf]

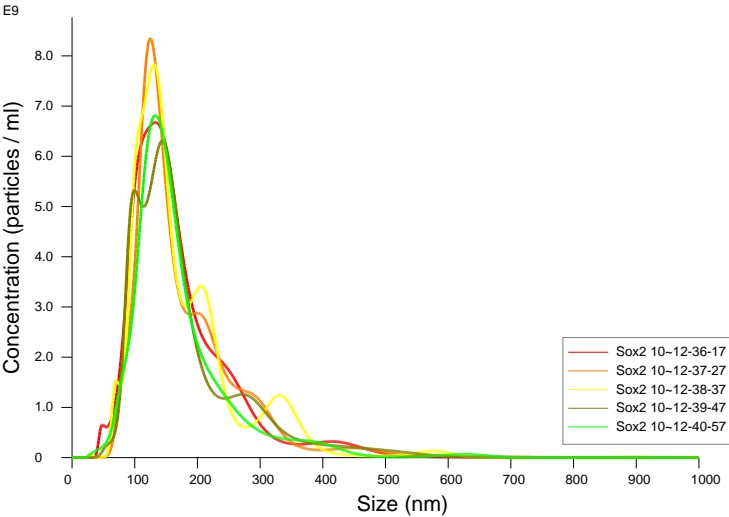

FTLA Concentration / Size graph for Experiment:  
Sox2 1000x 5 60 120 2025-07-24 12-33-01

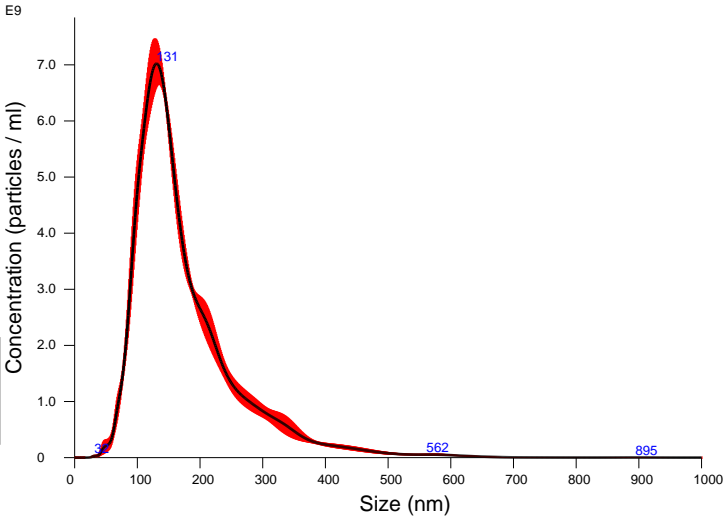

Averaged FTLA Concentration / Size for Experiment:  
Sox2 1000x 5 60 120 2025-07-24 12-33-01  
Error bars indicate + / -1 standard error of the mean

|                                                                                                                                                                                                                                                                                                                                                                                                                                                                                                                                                                                                                                                                                                                                                                                                                                                                                                                                                                                                                                                                                                                                                                                                                                                   |                                                                                                                                                                                                                                                                                                                                                                                                                                                                                                                                                                                                                                                                          |
|---------------------------------------------------------------------------------------------------------------------------------------------------------------------------------------------------------------------------------------------------------------------------------------------------------------------------------------------------------------------------------------------------------------------------------------------------------------------------------------------------------------------------------------------------------------------------------------------------------------------------------------------------------------------------------------------------------------------------------------------------------------------------------------------------------------------------------------------------------------------------------------------------------------------------------------------------------------------------------------------------------------------------------------------------------------------------------------------------------------------------------------------------------------------------------------------------------------------------------------------------|--------------------------------------------------------------------------------------------------------------------------------------------------------------------------------------------------------------------------------------------------------------------------------------------------------------------------------------------------------------------------------------------------------------------------------------------------------------------------------------------------------------------------------------------------------------------------------------------------------------------------------------------------------------------------|
| <div>Included Files</div> <div>Sox2 1000x 5 60 120 2025-07-24 12-36-17<br/>Sox2 1000x 5 60 120 2025-07-24 12-37-27<br/>Sox2 1000x 5 60 120 2025-07-24 12-38-37<br/>Sox2 1000x 5 60 120 2025-07-24 12-39-47<br/>Sox2 1000x 5 60 120 2025-07-24 12-40-57</div> <div>Details</div> <div><div>NTA Version:</div><div>Script Used:</div><div>Time Captured:</div><div>Operator:</div><div>Pre-treatment:</div><div>Sample Name:</div><div>Diluent:</div><div>Remarks:</div></div> <div>NTA 3.4 - Sample Assistant Build 3.4.4 - SA<br/>SOP Standard Measurement 12-32-42PM 24J~<br/>12:33:01 24/07/2025<br/>jitka<br/><br/>Sox2<br/>water</div> <div>Capture Settings</div> <div><div>Camera Type:</div><div>Laser Type:</div><div>Camera Level:</div><div>Slider Shutter:</div><div>Slider Gain:</div><div>FPS</div><div>Number of Frames:</div><div>Temperature:</div><div>Viscosity:</div><div>Dilution factor:</div><div>Syringe Pump Speed:</div></div> <div>sCMOS<br/>Blue405<br/>12<br/>1200<br/>146<br/>25.0<br/>1498<br/>25.0 °C<br/>1.0 cP<br/>1 x 10e3<br/>120</div> <div>Analysis Settings</div> <div><div>Detect Threshold:</div><div>Blur Size:</div><div>Max Jump Distance:</div></div> <div>5<br/>Auto<br/>Auto: 15.0 - 17.3 pix</div> | <div>Results</div> <div>Stats: Merged Data</div> <div><div>Mean:</div><div>Mode:</div><div>SD:</div><div>D10:</div><div>D50:</div><div>D90:</div></div> <div>176.0 nm<br/>130.7 nm<br/>86.8 nm<br/>98.4 nm<br/>150.8 nm<br/>288.6 nm</div> <div>Stats: Mean +/- Standard Error</div> <div><div>Mean:</div><div>Mode:</div><div>SD:</div><div>D10:</div><div>D50:</div><div>D90:</div><div>Concentration (Upgrade):</div></div> <div>176.0 +/- 1.5 nm<br/>133.2 +/- 3.1 nm<br/>86.7 +/- 1.4 nm<br/>98.7 +/- 1.6 nm<br/>150.8 +/- 0.6 nm<br/>288.4 +/- 7.4 nm<br/>8.25e+11 +/- 2.68e+10 particles/ml<br/>55.3 +/- 1.6 particles/frame<br/>58.1 +/- 1.7 centres/frame</div> |
|---------------------------------------------------------------------------------------------------------------------------------------------------------------------------------------------------------------------------------------------------------------------------------------------------------------------------------------------------------------------------------------------------------------------------------------------------------------------------------------------------------------------------------------------------------------------------------------------------------------------------------------------------------------------------------------------------------------------------------------------------------------------------------------------------------------------------------------------------------------------------------------------------------------------------------------------------------------------------------------------------------------------------------------------------------------------------------------------------------------------------------------------------------------------------------------------------------------------------------------------------|--------------------------------------------------------------------------------------------------------------------------------------------------------------------------------------------------------------------------------------------------------------------------------------------------------------------------------------------------------------------------------------------------------------------------------------------------------------------------------------------------------------------------------------------------------------------------------------------------------------------------------------------------------------------------|

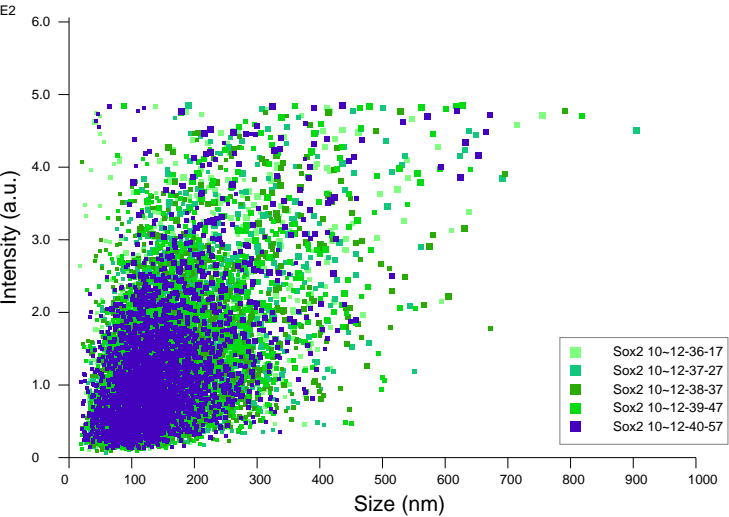

Script Used: (Full Text):

SOP Standard Measurement 12-32-42PM 24Jul2025.txt
