# Supplementary material
Source: Research Square preprint supplement (doi:10.21203/rs.3.rs-9703493/v1)
Supplement: Supplementary file 20 [file Ube3a-BioID2.pdf › NTA/UC/Ube3a-BioID2.pdf]

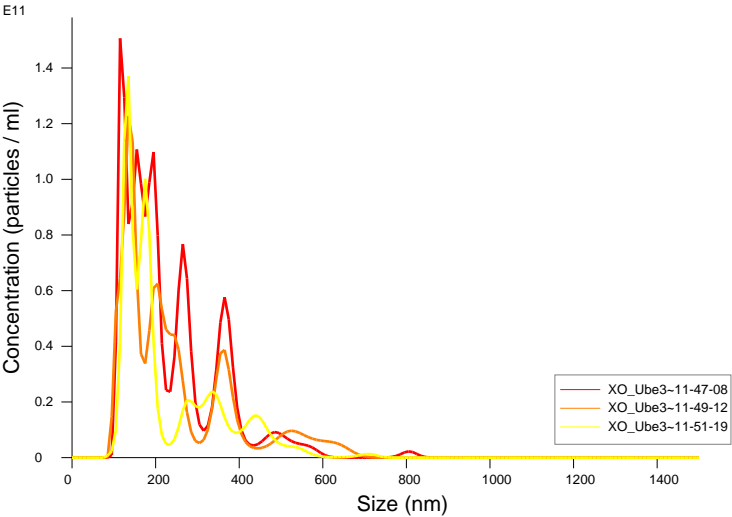

FTLA Concentration / Size graph for Experiment:  
XO\_Ube3a\_BioID2\_H2\_ 2022-10-11 11-46-58

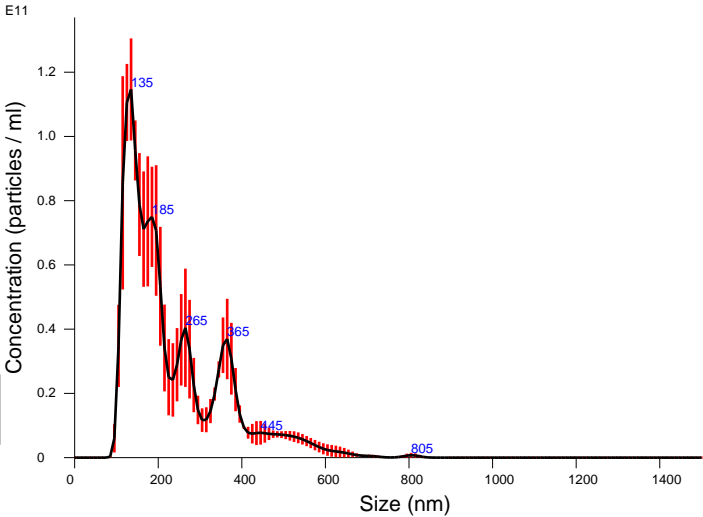

Averaged FTLA Concentration / Size for Experiment:  
XO\_Ube3a\_BioID2\_H2\_ 2022-10-11 11-46-58  
Error bars indicate + / - 1 standard error of the mean

|                                                                                                                                                                                                                                                                                                                                                                                                                                                                                                                                                                                                                                                                                                                                                                                                                                                                                                                                                                                                      |                                                                                                                                                                                                                                                                                                                                                                                                                                                                                                                                                                                                                                             |
|------------------------------------------------------------------------------------------------------------------------------------------------------------------------------------------------------------------------------------------------------------------------------------------------------------------------------------------------------------------------------------------------------------------------------------------------------------------------------------------------------------------------------------------------------------------------------------------------------------------------------------------------------------------------------------------------------------------------------------------------------------------------------------------------------------------------------------------------------------------------------------------------------------------------------------------------------------------------------------------------------|---------------------------------------------------------------------------------------------------------------------------------------------------------------------------------------------------------------------------------------------------------------------------------------------------------------------------------------------------------------------------------------------------------------------------------------------------------------------------------------------------------------------------------------------------------------------------------------------------------------------------------------------|
| <div>Included Files</div> <div>XO_Ube3a_BioID2_H2_ 2022-10-11 11-47-08<br/>XO_Ube3a_BioID2_H2_ 2022-10-11 11-49-12<br/>XO_Ube3a_BioID2_H2_ 2022-10-11 11-51-19</div> <div>Details</div> <div><div>NTA Version:NTA 3.4 Build 3.4.4</div><div>Script Used:SOP Standard Measurement 11-46-58AM 11O~</div><div>Time Captured:11:46:58 11/10/2022</div><div>Operator:Jacopo</div><div>Pre-treatment:</div><div>Sample Name:</div><div>Diluent:1000</div><div>Remarks:Some aggregate</div></div> <div>Capture Settings</div> <div><div>Camera Type:sCMOS</div><div>Laser Type:Blue405</div><div>Camera Level:15</div><div>Slider Shutter:1206</div><div>Slider Gain:366</div><div>FPS:25.0</div><div>Number of Frames:1498</div><div>Temperature:19.3 - 19.4 °C</div><div>Viscosity:(Water) 1.014 - 1.016 cP</div><div>Dilution factor:1 x 10e3</div></div> <div>Analysis Settings</div> <div><div>Detect Threshold:5</div><div>Blur Size:Auto</div><div>Max Jump Distance:Auto: 6.7 - 6.9 pix</div></div> | <div>Results</div> <div><div>Stats: Merged Data</div><div><div>Mean:235.2 nm</div><div>Mode:131.8 nm</div><div>SD:122.5 nm</div><div>D10:122.1 nm</div><div>D50:190.6 nm</div><div>D90:398.2 nm</div></div><div><div>Stats: Mean +/- Standard Error</div><div><div>Mean:235.3 +/- 4.7 nm</div><div>Mode:129.7 +/- 5.8 nm</div><div>SD:122.7 +/- 6.3 nm</div><div>D10:122.2 +/- 1.8 nm</div><div>D50:191.2 +/- 7.5 nm</div><div>D90:418.6 +/- 22.1 nm</div></div><div><div>Concentration:</div><div>1.50e+12 +/- 2.05e+11 particles/ml</div><div>82.0 +/- 11.2 particles/frame</div><div>93.6 +/- 15.4 centres/frame</div></div></div></div> |
|------------------------------------------------------------------------------------------------------------------------------------------------------------------------------------------------------------------------------------------------------------------------------------------------------------------------------------------------------------------------------------------------------------------------------------------------------------------------------------------------------------------------------------------------------------------------------------------------------------------------------------------------------------------------------------------------------------------------------------------------------------------------------------------------------------------------------------------------------------------------------------------------------------------------------------------------------------------------------------------------------|---------------------------------------------------------------------------------------------------------------------------------------------------------------------------------------------------------------------------------------------------------------------------------------------------------------------------------------------------------------------------------------------------------------------------------------------------------------------------------------------------------------------------------------------------------------------------------------------------------------------------------------------|

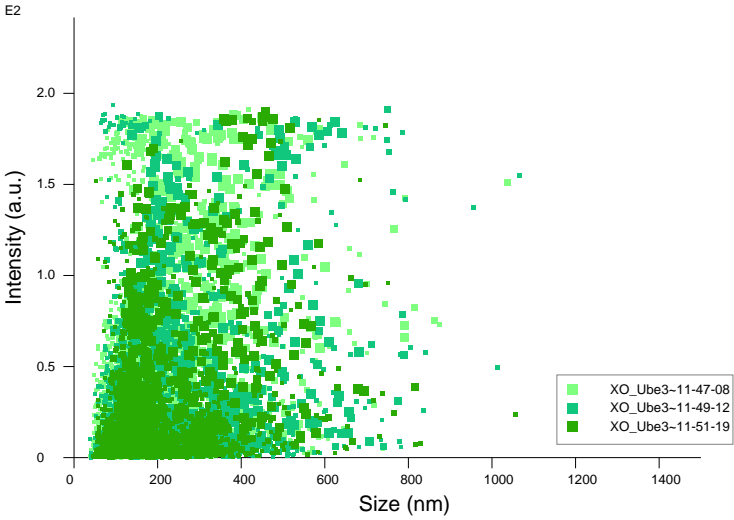

Intensity / Size graph for Experiment:  
XO\_Ube3a\_BiolD2\_H2\_ 2022-10-11 11-46-58

**Script Used: (Full Text):**

SOP Standard Measurement 11-46-58AM 11Oct2022.txt
