# Supplementary material
Source: Research Square preprint supplement (doi:10.21203/rs.3.rs-9703493/v1)
Supplement: Supplementary file 21 [file Umod Y178 5 60 120 2000x 2026-03-09 13-30-48-ExperimentReport.pdf › NTA/UC/Umod Y178 5 60 120 2000x 2026-03-09 13-30-48-ExperimentReport.pdf]

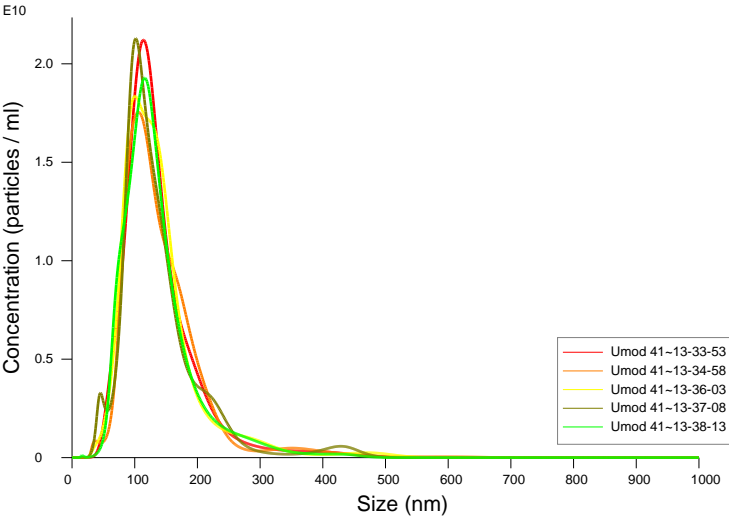

FTLA Concentration / Size graph for Experiment:  
Umod 4178 5 60 120 2000x 2026-03-09 13-30-48

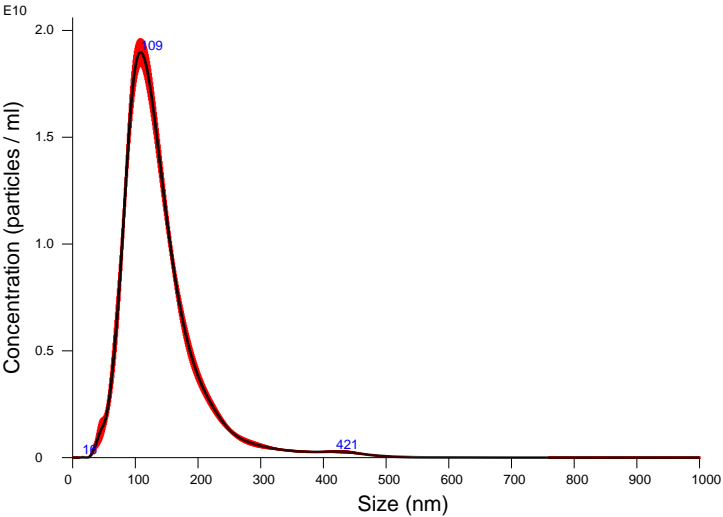

Averaged FTLA Concentration / Size for Experiment:  
Umod 4178 5 60 120 2000x 2026-03-09 13-30-48  
Error bars indicate + / - 1 standard error of the mean

|                                                                                                                                                                                                                                                                                                                                                                                                                                                                                                                                                                                                                                                                                                                                                                                                                                                                                                                                                                                                                                                                                                                                                        |                                                                                                                                                                                                                                                                                                                                                                                                                                                                                                                                                                                                                |
|--------------------------------------------------------------------------------------------------------------------------------------------------------------------------------------------------------------------------------------------------------------------------------------------------------------------------------------------------------------------------------------------------------------------------------------------------------------------------------------------------------------------------------------------------------------------------------------------------------------------------------------------------------------------------------------------------------------------------------------------------------------------------------------------------------------------------------------------------------------------------------------------------------------------------------------------------------------------------------------------------------------------------------------------------------------------------------------------------------------------------------------------------------|----------------------------------------------------------------------------------------------------------------------------------------------------------------------------------------------------------------------------------------------------------------------------------------------------------------------------------------------------------------------------------------------------------------------------------------------------------------------------------------------------------------------------------------------------------------------------------------------------------------|
| <div>Included Files</div> <div>Umod 4178 5 60 120 2000x 2026-03-09 13-33-53<br/>Umod 4178 5 60 120 2000x 2026-03-09 13-34-58<br/>Umod 4178 5 60 120 2000x 2026-03-09 13-36-03<br/>Umod 4178 5 60 120 2000x 2026-03-09 13-37-08<br/>Umod 4178 5 60 120 2000x 2026-03-09 13-38-13</div> <div>Details</div> <div><div>NTA Version:NTA 3.4 - Sample Assistant Build 3.4.4 - SA</div><div>Script Used:SOP Standard Measurement 01-30-46PM 09~</div><div>Time Captured:13:30:48 09/03/2026</div><div>Operator:jitka</div><div>Pre-treatment:2000x</div><div>Sample Name:4178</div><div>Diluent:pbs</div><div>Remarks:</div></div> <div>Capture Settings</div> <div><div>Camera Type:sCMOS</div><div>Laser Type:Blue405</div><div>Camera Level:12</div><div>Slider Shutter:1200</div><div>Slider Gain:146</div><div>FPS:25.0</div><div>Number of Frames:1498</div><div>Temperature:25.0 - 25.0 °C</div><div>Viscosity:1.0 cP</div><div>Dilution factor:2 x 10e3</div><div>Syringe Pump Speed:120</div></div> <div>Analysis Settings</div> <div><div>Detect Threshold:5</div><div>Blur Size:Auto</div><div>Max Jump Distance:Auto: 18.2 - 19.8 pix</div></div> | <div>Results</div> <div><div>Stats: Merged Data</div><div><div>Mean:139.4 nm</div><div>Mode:108.3 nm</div><div>SD:64.8 nm</div><div>D10:81.5 nm</div><div>D50:124.7 nm</div><div>D90:210.1 nm</div></div></div> <div><div>Stats: Mean +/- Standard Error</div><div><div>Mean:139.4 +/- 1.2 nm</div><div>Mode:107.6 +/- 3.2 nm</div><div>SD:64.7 +/- 1.7 nm</div><div>D10:81.5 +/- 0.9 nm</div><div>D50:124.8 +/- 1.0 nm</div><div>D90:209.9 +/- 1.6 nm</div></div><div>Concentration (Upgrade): 1.85e+12 +/- 2.62e+10 particles/ml<br/>77.2 +/- 0.8 particles/frame<br/>75.6 +/- 0.8 centres/frame</div></div> |
|--------------------------------------------------------------------------------------------------------------------------------------------------------------------------------------------------------------------------------------------------------------------------------------------------------------------------------------------------------------------------------------------------------------------------------------------------------------------------------------------------------------------------------------------------------------------------------------------------------------------------------------------------------------------------------------------------------------------------------------------------------------------------------------------------------------------------------------------------------------------------------------------------------------------------------------------------------------------------------------------------------------------------------------------------------------------------------------------------------------------------------------------------------|----------------------------------------------------------------------------------------------------------------------------------------------------------------------------------------------------------------------------------------------------------------------------------------------------------------------------------------------------------------------------------------------------------------------------------------------------------------------------------------------------------------------------------------------------------------------------------------------------------------|

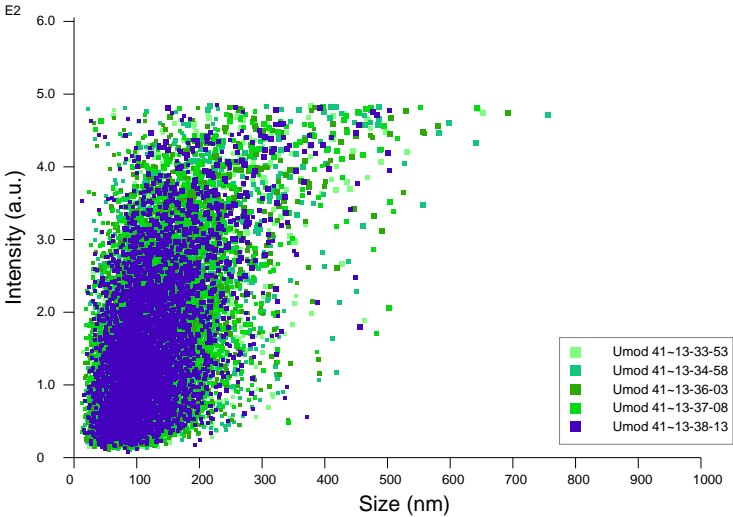

Intensity / Size graph for Experiment:  
Umod 4178 5 60 120 2000x 2026-03-09 13-30-48

**Script Used: (Full Text):**

SOP Standard Measurement 01-30-46PM 09Mar2026.txt
