# Supplementary material
Source: Research Square preprint supplement (doi:10.21203/rs.3.rs-9703493/v1)
Supplement: Supplementary file 22 [file pbs 5 60 120 2026-03-09 14-08-15-ExperimentReport.pdf › NTA/UC/pbs 5 60 120 2026-03-09 14-08-15-ExperimentReport.pdf]

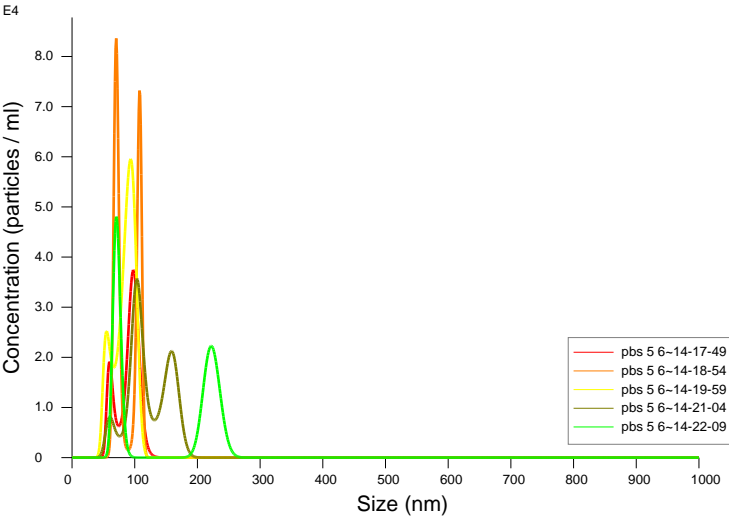

FTLA Concentration / Size graph for Experiment:  
pbs 5 60 120 2026-03-09 14-08-15

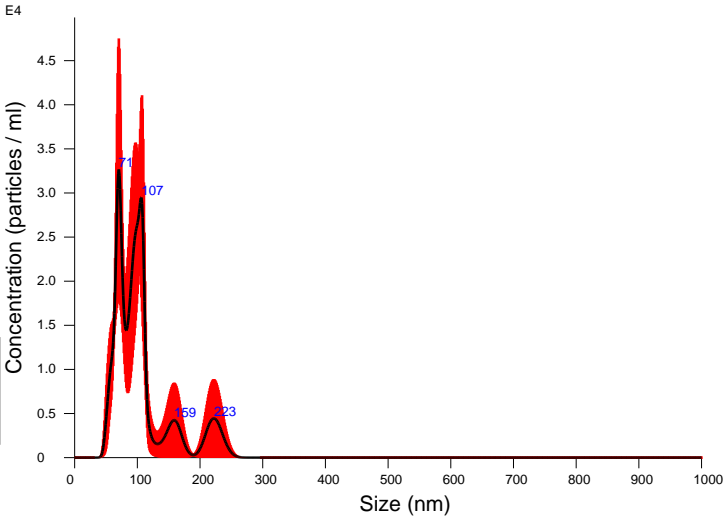

Averaged FTLA Concentration / Size for Experiment:  
pbs 5 60 120 2026-03-09 14-08-15  
Error bars indicate + / - 1 standard error of the mean

|                                                                                                                                                                                                                                                                                                                                                                                                                                                                                                                                                                                                                                                                                                                                                                                                                                                                                                                                                                                                                                                                                 |                                                                                                                                                                                                                                                                                                                                                                                                                                                                                                                                                                                                                                                                                                                         |
|---------------------------------------------------------------------------------------------------------------------------------------------------------------------------------------------------------------------------------------------------------------------------------------------------------------------------------------------------------------------------------------------------------------------------------------------------------------------------------------------------------------------------------------------------------------------------------------------------------------------------------------------------------------------------------------------------------------------------------------------------------------------------------------------------------------------------------------------------------------------------------------------------------------------------------------------------------------------------------------------------------------------------------------------------------------------------------|-------------------------------------------------------------------------------------------------------------------------------------------------------------------------------------------------------------------------------------------------------------------------------------------------------------------------------------------------------------------------------------------------------------------------------------------------------------------------------------------------------------------------------------------------------------------------------------------------------------------------------------------------------------------------------------------------------------------------|
| <div>Included Files</div> <div>pbs 5 60 120 2026-03-09 14-17-49<br/>pbs 5 60 120 2026-03-09 14-18-54<br/>pbs 5 60 120 2026-03-09 14-19-59<br/>pbs 5 60 120 2026-03-09 14-21-04<br/>pbs 5 60 120 2026-03-09 14-22-09</div> <div>Details</div> <div><div>NTA Version:NTA 3.4 - Sample Assistant Build 3.4.4 - SA</div><div>Script Used:SOP Standard Measurement 02-08-13PM 09~</div><div>Time Captured:14:08:15 09/03/2026</div><div>Operator:jitka</div><div>Pre-treatment:1x</div><div>Sample Name:pbs</div><div>Diluent:pbs</div><div>Remarks:</div></div> <div>Capture Settings</div> <div><div>Camera Type:sCMOS</div><div>Laser Type:Blue405</div><div>Camera Level:12</div><div>Slider Shutter:1200</div><div>Slider Gain:146</div><div>FPS:25.0</div><div>Number of Frames:1498</div><div>Temperature:25.0 - 25.0 °C</div><div>Viscosity:1.0 cP</div><div>Dilution factor:1 x 10e0</div><div>Syringe Pump Speed:120</div></div> <div>Analysis Settings</div> <div><div>Detect Threshold:5</div><div>Blur Size:Auto</div><div>Max Jump Distance:Auto: 14.6 pix</div></div> | <div>Results</div> <div><div>Stats: Merged Data</div><div><div>Mean:104.9 nm</div><div>Mode:70.4 nm</div><div>SD:45.6 nm</div><div>D10:64.6 nm</div><div>D50:94.8 nm</div><div>D90:172.6 nm</div></div></div> <div><div>Stats: Mean +/- Standard Error</div><div><div>Mean:105.6 +/- 12.4 nm</div><div>Mode:87.2 +/- 7.0 nm</div><div>SD:32.4 +/- 11.4 nm</div><div>D10:66.1 +/- 4.1 nm</div><div>D50:93.6 +/- 5.9 nm</div><div>D90:144.1 +/- 25.2 nm</div></div><div>Concentration (Upgrade): 1.63e+06 +/- 1.55e+05 particles/ml</div><div>0.1 +/- 0.0 particles/frame</div><div>0.2 +/- 0.0 centres/frame</div><div>Concentration measurements may be unreliable</div><div>See summary file for more info</div></div> |
|---------------------------------------------------------------------------------------------------------------------------------------------------------------------------------------------------------------------------------------------------------------------------------------------------------------------------------------------------------------------------------------------------------------------------------------------------------------------------------------------------------------------------------------------------------------------------------------------------------------------------------------------------------------------------------------------------------------------------------------------------------------------------------------------------------------------------------------------------------------------------------------------------------------------------------------------------------------------------------------------------------------------------------------------------------------------------------|-------------------------------------------------------------------------------------------------------------------------------------------------------------------------------------------------------------------------------------------------------------------------------------------------------------------------------------------------------------------------------------------------------------------------------------------------------------------------------------------------------------------------------------------------------------------------------------------------------------------------------------------------------------------------------------------------------------------------|

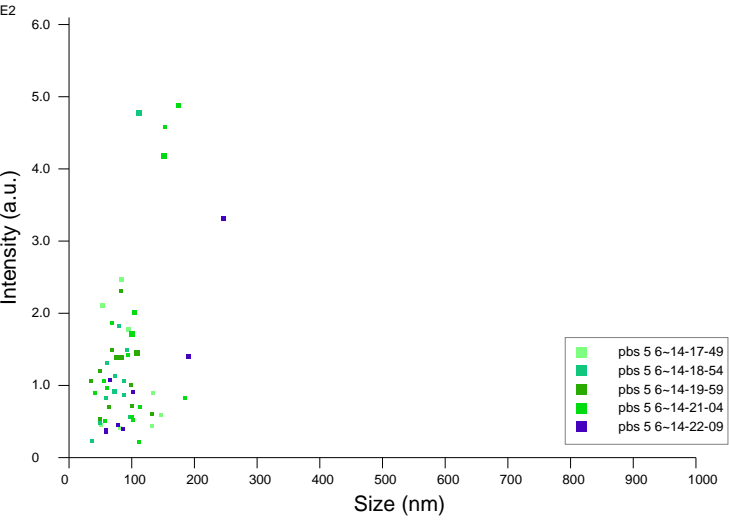

Script Used: (Full Text):

SOP Standard Measurement 02-08-13PM 09Mar2026.txt
