# Supplementary material
Source: Research Square preprint supplement (doi:10.21203/rs.3.rs-9703493/v1)
Supplement: Supplementary file 23 [file Cypces 1000x 5 60 120 2025-07-24 13-35-08-ExperimentReport.pdf › NTA/UCF/Cypces 1000x 5 60 120 2025-07-24 13-35-08-ExperimentReport.pdf]

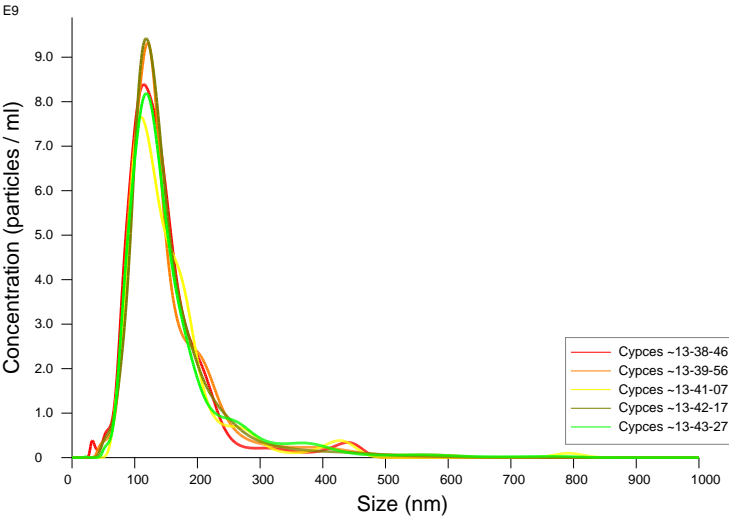

FTLA Concentration / Size graph for Experiment:  
Cypces 1000x 5 60 120 2025-07-24 13-35-08

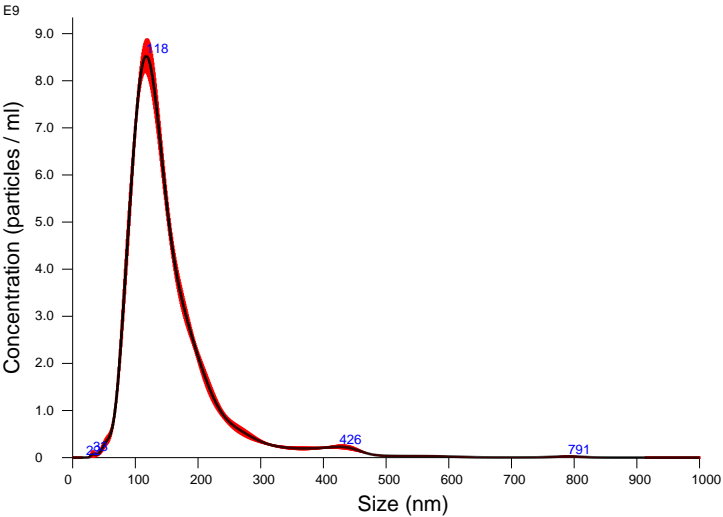

Averaged FTLA Concentration / Size for Experiment:  
Cypces 1000x 5 60 120 2025-07-24 13-35-08  
Error bars indicate + / - 1 standard error of the mean

|                                                                                                                                                                                                                                                                                                                                                                                                                                                                                                                                                                                                                                                                                                                                                                                                                                                                                                                                                                                                                                                                                                                                                                      |                                                                                                                                                                                                                                                                                                                                                                                                                                                                                                                                                                                                                                    |
|----------------------------------------------------------------------------------------------------------------------------------------------------------------------------------------------------------------------------------------------------------------------------------------------------------------------------------------------------------------------------------------------------------------------------------------------------------------------------------------------------------------------------------------------------------------------------------------------------------------------------------------------------------------------------------------------------------------------------------------------------------------------------------------------------------------------------------------------------------------------------------------------------------------------------------------------------------------------------------------------------------------------------------------------------------------------------------------------------------------------------------------------------------------------|------------------------------------------------------------------------------------------------------------------------------------------------------------------------------------------------------------------------------------------------------------------------------------------------------------------------------------------------------------------------------------------------------------------------------------------------------------------------------------------------------------------------------------------------------------------------------------------------------------------------------------|
| <div><div>Included Files</div><div>Cypces 1000x 5 60 120 2025-07-24 13-38-46<br/>Cypces 1000x 5 60 120 2025-07-24 13-39-56<br/>Cypces 1000x 5 60 120 2025-07-24 13-41-07<br/>Cypces 1000x 5 60 120 2025-07-24 13-42-17<br/>Cypces 1000x 5 60 120 2025-07-24 13-43-27</div><div><div>Details</div><div><div>NTA Version:NTA 3.4 - Sample Assistant Build 3.4.4 - SA</div><div>Script Used:SOP Standard Measurement 01-34-53PM 24J~</div><div>Time Captured:13:35:08 24/07/2025</div><div>Operator:jitka</div><div>Pre-treatment:</div><div>Sample Name:</div><div>Diluent:pbs</div><div>Remarks:</div></div><div><div>Capture Settings</div><div><div>Camera Type:sCMOS</div><div>Laser Type:Blue405</div><div>Camera Level:12</div><div>Slider Shutter:1200</div><div>Slider Gain:146</div><div>FPS:25.0</div><div>Number of Frames:1498</div><div>Temperature:25.0 - 25.0 °C</div><div>Viscosity:1.0 cP</div><div>Dilution factor:1 x 10e3</div><div>Syringe Pump Speed:120</div></div><div><div>Analysis Settings</div><div><div>Detect Threshold:5</div><div>Blur Size:Auto</div><div>Max Jump Distance:Auto: 15.2 - 18.3 pix</div></div></div></div></div></div> | <div><div>Results</div><div><div>Stats: Merged Data</div><div><div>Mean:155.5 nm</div><div>Mode:117.4 nm</div><div>SD:80.4 nm</div><div>D10:91.3 nm</div><div>D50:134.1 nm</div><div>D90:235.9 nm</div></div></div><div><div>Stats: Mean +/- Standard Error</div><div><div>Mean:155.6 +/- 2.4 nm</div><div>Mode:116.3 +/- 1.9 nm</div><div>SD:79.9 +/- 4.6 nm</div><div>D10:91.4 +/- 1.0 nm</div><div>D50:134.3 +/- 0.9 nm</div><div>D90:238.2 +/- 7.3 nm</div><div>Concentration (Upgrade):8.22e+11 +/- 1.23e+10 particles/ml</div><div>54.8 +/- 0.7 particles/frame</div><div>58.6 +/- 0.4 centres/frame</div></div></div></div> |
|----------------------------------------------------------------------------------------------------------------------------------------------------------------------------------------------------------------------------------------------------------------------------------------------------------------------------------------------------------------------------------------------------------------------------------------------------------------------------------------------------------------------------------------------------------------------------------------------------------------------------------------------------------------------------------------------------------------------------------------------------------------------------------------------------------------------------------------------------------------------------------------------------------------------------------------------------------------------------------------------------------------------------------------------------------------------------------------------------------------------------------------------------------------------|------------------------------------------------------------------------------------------------------------------------------------------------------------------------------------------------------------------------------------------------------------------------------------------------------------------------------------------------------------------------------------------------------------------------------------------------------------------------------------------------------------------------------------------------------------------------------------------------------------------------------------|

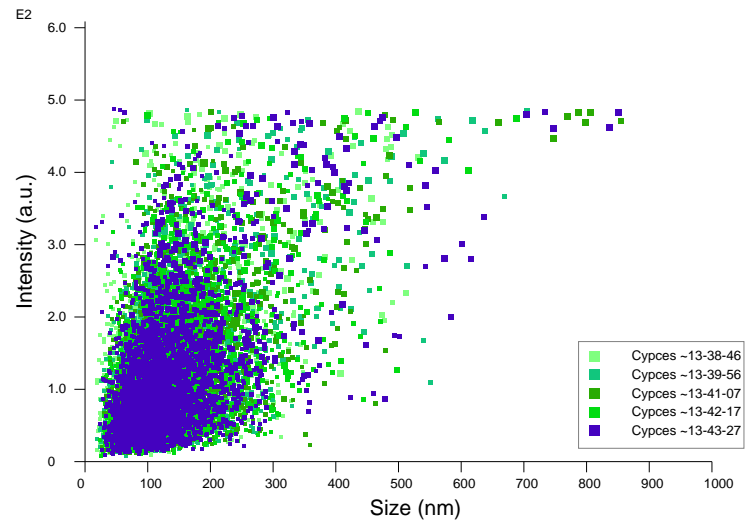

Intensity / Size graph for Experiment:  
Cypces 1000x 5 60 120 2025-07-24 13-35-08

**Script Used: (Full Text):**

SOP Standard Measurement 01-34-53PM 24Jul2025.txt
