# Supplementary material
Source: Research Square preprint supplement (doi:10.21203/rs.3.rs-9703493/v1)
Supplement: Supplementary file 24 [file EV Sox2-mStr 6h 1000x 5 60 120 2024-12-18 11-42-32-ExperimentReport.pdf › NTA/UCF/EV Sox2-mStr 6h 1000x 5 60 120 2024-12-18 11-42-32-ExperimentReport.pdf]

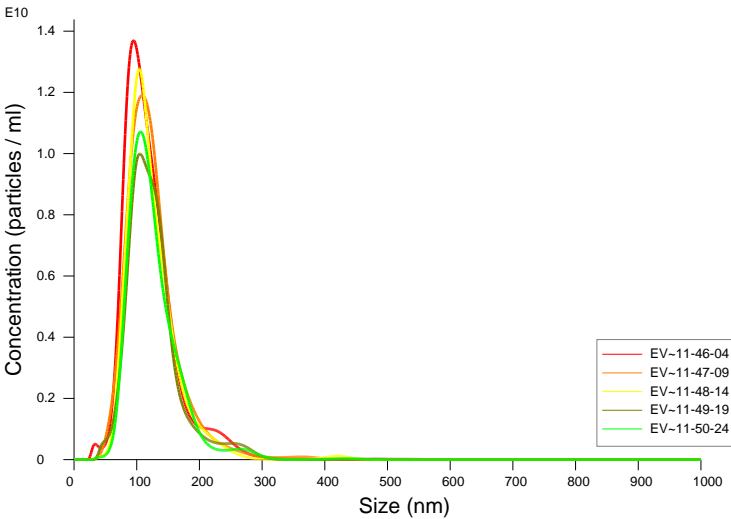

FTLA Concentration / Size graph for Experiment:  
EV Sox2-mStr 6h 1000x 5 60 120 2024-12-18 11-42-32

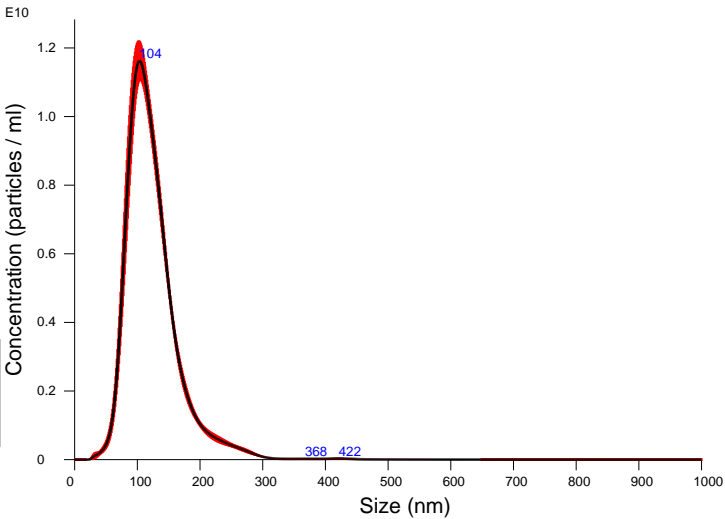

Averaged FTLA Concentration / Size for Experiment:  
EV Sox2-mStr 6h 1000x 5 60 120 2024-12-18 11-42-32  
Error bars indicate + / - 1 standard error of the mean

|                                                                                                                                                                                                                                                                                                                                                                                                                                                                                                                                                                                                                                                                                                                                                                                                                                                                                                                                                                                                                                                                                                                                                                             |                                                                                                                                                                                                                                                                                                                                                                                                                                                                                                                                                                                             |
|-----------------------------------------------------------------------------------------------------------------------------------------------------------------------------------------------------------------------------------------------------------------------------------------------------------------------------------------------------------------------------------------------------------------------------------------------------------------------------------------------------------------------------------------------------------------------------------------------------------------------------------------------------------------------------------------------------------------------------------------------------------------------------------------------------------------------------------------------------------------------------------------------------------------------------------------------------------------------------------------------------------------------------------------------------------------------------------------------------------------------------------------------------------------------------|---------------------------------------------------------------------------------------------------------------------------------------------------------------------------------------------------------------------------------------------------------------------------------------------------------------------------------------------------------------------------------------------------------------------------------------------------------------------------------------------------------------------------------------------------------------------------------------------|
| <div>Included Files</div> <div>EV Sox2-mStr 6h 1000x 5 60 120 2024-12-18 11-46-04<br/>EV Sox2-mStr 6h 1000x 5 60 120 2024-12-18 11-47-09<br/>EV Sox2-mStr 6h 1000x 5 60 120 2024-12-18 11-48-14<br/>EV Sox2-mStr 6h 1000x 5 60 120 2024-12-18 11-49-19<br/>EV Sox2-mStr 6h 1000x 5 60 120 2024-12-18 11-50-24</div> <div>Details</div> <div><div>NTA Version:NTA 3.4 - Sample Assistant Build 3.4.4 - SA</div><div>Script Used:SOP Standard Measurement 11-42-13AM 18~</div><div>Time Captured:11:42:32 18/12/2024</div><div>Operator:Jitka</div><div>Pre-treatment:</div><div>Sample Name:</div><div>Diluent:pbs</div><div>Remarks:</div></div> <div>Capture Settings</div> <div><div>Camera Type:sCMOS</div><div>Laser Type:Blue405</div><div>Camera Level:12</div><div>Slider Shutter:1200</div><div>Slider Gain:146</div><div>FPS:25.0</div><div>Number of Frames:1498</div><div>Temperature:25.0 - 25.0 °C</div><div>Viscosity:1.0 cP</div><div>Dilution factor:1 x 10e3</div><div>Syringe Pump Speed:120</div></div> <div>Analysis Settings</div> <div><div>Detect Threshold:5</div><div>Blur Size:Auto</div><div>Max Jump Distance:Auto: 16.4 - 19.2 pix</div></div> | <div>Results</div> <div>Stats: Merged Data</div> <div><div>Mean:124.1 nm</div><div>Mode:103.6 nm</div><div>SD:44.2 nm</div><div>D10:81.4 nm</div><div>D50:115.7 nm</div><div>D90:174.3 nm</div></div> <div>Stats: Mean +/- Standard Error</div> <div><div>Mean:124.3 +/- 1.0 nm</div><div>Mode:103.8 +/- 2.3 nm</div><div>SD:44.0 +/- 0.5 nm</div><div>D10:81.9 +/- 1.2 nm</div><div>D50:115.8 +/- 1.3 nm</div><div>D90:174.3 +/- 0.8 nm</div></div> <div>Concentration (Upgrade): 8.95e+11 +/- 4.82e+10 particles/ml<br/>62.1 +/- 3.2 particles/frame<br/>63.7 +/- 2.7 centres/frame</div> |
|-----------------------------------------------------------------------------------------------------------------------------------------------------------------------------------------------------------------------------------------------------------------------------------------------------------------------------------------------------------------------------------------------------------------------------------------------------------------------------------------------------------------------------------------------------------------------------------------------------------------------------------------------------------------------------------------------------------------------------------------------------------------------------------------------------------------------------------------------------------------------------------------------------------------------------------------------------------------------------------------------------------------------------------------------------------------------------------------------------------------------------------------------------------------------------|---------------------------------------------------------------------------------------------------------------------------------------------------------------------------------------------------------------------------------------------------------------------------------------------------------------------------------------------------------------------------------------------------------------------------------------------------------------------------------------------------------------------------------------------------------------------------------------------|

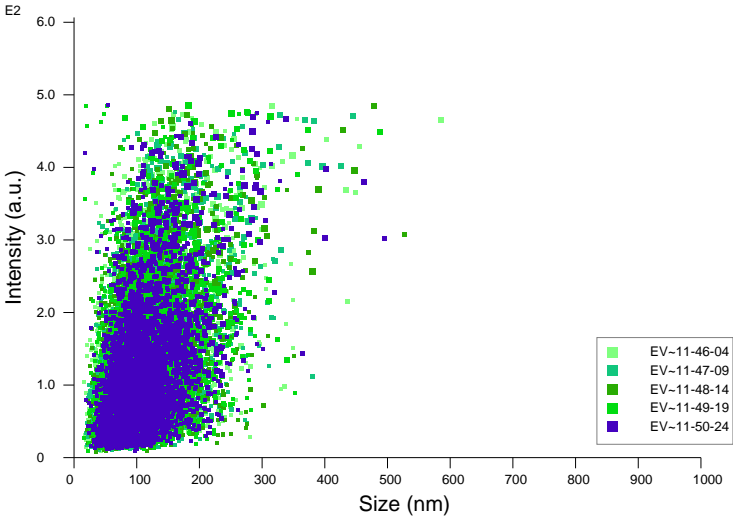

**Script Used: (Full Text):**

SOP Standard Measurement 11-42-13AM 18Dec2024.txt
