# Supplementary material
Source: Research Square preprint supplement (doi:10.21203/rs.3.rs-9703493/v1)
Supplement: Supplementary file 25 [file Umod C126 5 60 120 2000x 2026-03-09 13-47-44-ExperimentReport.pdf › NTA/UCF/Umod C126 5 60 120 2000x 2026-03-09 13-47-44-ExperimentReport.pdf]

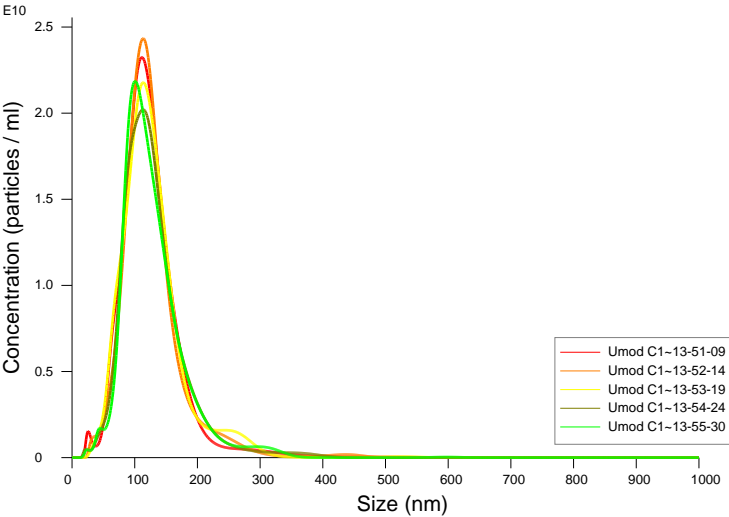

FTLA Concentration / Size graph for Experiment:  
Umod C126 5 60 120 2000x 2026-03-09 13-47-44

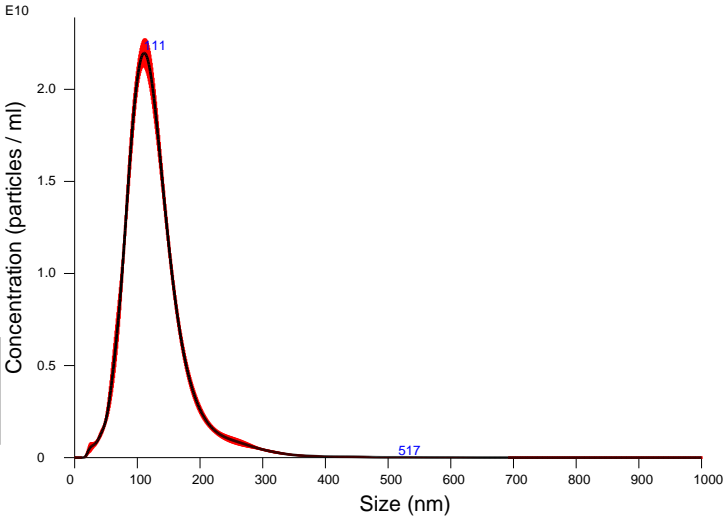

Averaged FTLA Concentration / Size for Experiment:  
Umod C126 5 60 120 2000x 2026-03-09 13-47-44  
Error bars indicate + / -1 standard error of the mean

|                                                                                                                                                                                                                                                                                                                                                                                                                                                                                                                                                                                                                                                                                                                                                                                                                                                                                                                                                                                                                                                                                                                                                        |                                                                                                                                                                                                                                                                                                                                                                                                                                                                                                                                                                                             |
|--------------------------------------------------------------------------------------------------------------------------------------------------------------------------------------------------------------------------------------------------------------------------------------------------------------------------------------------------------------------------------------------------------------------------------------------------------------------------------------------------------------------------------------------------------------------------------------------------------------------------------------------------------------------------------------------------------------------------------------------------------------------------------------------------------------------------------------------------------------------------------------------------------------------------------------------------------------------------------------------------------------------------------------------------------------------------------------------------------------------------------------------------------|---------------------------------------------------------------------------------------------------------------------------------------------------------------------------------------------------------------------------------------------------------------------------------------------------------------------------------------------------------------------------------------------------------------------------------------------------------------------------------------------------------------------------------------------------------------------------------------------|
| <div>Included Files</div> <div>Umod C126 5 60 120 2000x 2026-03-09 13-51-09<br/>Umod C126 5 60 120 2000x 2026-03-09 13-52-14<br/>Umod C126 5 60 120 2000x 2026-03-09 13-53-19<br/>Umod C126 5 60 120 2000x 2026-03-09 13-54-24<br/>Umod C126 5 60 120 2000x 2026-03-09 13-55-30</div> <div>Details</div> <div><div>NTA Version:NTA 3.4 - Sample Assistant Build 3.4.4 - SA</div><div>Script Used:SOP Standard Measurement 01-47-42PM 09~</div><div>Time Captured:13:47:44 09/03/2026</div><div>Operator:jitka</div><div>Pre-treatment:2000x</div><div>Sample Name:C126</div><div>Diluent:pbs</div><div>Remarks:</div></div> <div>Capture Settings</div> <div><div>Camera Type:sCMOS</div><div>Laser Type:Blue405</div><div>Camera Level:12</div><div>Slider Shutter:1200</div><div>Slider Gain:146</div><div>FPS:25.0</div><div>Number of Frames:1498</div><div>Temperature:25.0 - 25.0 °C</div><div>Viscosity:1.0 cP</div><div>Dilution factor:2 x 10e3</div><div>Syringe Pump Speed:120</div></div> <div>Analysis Settings</div> <div><div>Detect Threshold:5</div><div>Blur Size:Auto</div><div>Max Jump Distance:Auto: 19.1 - 21.6 pix</div></div> | <div>Results</div> <div>Stats: Merged Data</div> <div><div>Mean:127.5 nm</div><div>Mode:111.0 nm</div><div>SD:51.0 nm</div><div>D10:77.8 nm</div><div>D50:118.9 nm</div><div>D90:183.2 nm</div></div> <div>Stats: Mean +/- Standard Error</div> <div><div>Mean:127.5 +/- 0.7 nm</div><div>Mode:110.5 +/- 2.5 nm</div><div>SD:51.0 +/- 0.3 nm</div><div>D10:77.7 +/- 1.2 nm</div><div>D50:118.9 +/- 0.4 nm</div><div>D90:183.4 +/- 2.4 nm</div></div> <div>Concentration (Upgrade): 1.92e+12 +/- 2.48e+10 particles/ml<br/>73.7 +/- 0.9 particles/frame<br/>70.9 +/- 0.5 centres/frame</div> |
|--------------------------------------------------------------------------------------------------------------------------------------------------------------------------------------------------------------------------------------------------------------------------------------------------------------------------------------------------------------------------------------------------------------------------------------------------------------------------------------------------------------------------------------------------------------------------------------------------------------------------------------------------------------------------------------------------------------------------------------------------------------------------------------------------------------------------------------------------------------------------------------------------------------------------------------------------------------------------------------------------------------------------------------------------------------------------------------------------------------------------------------------------------|---------------------------------------------------------------------------------------------------------------------------------------------------------------------------------------------------------------------------------------------------------------------------------------------------------------------------------------------------------------------------------------------------------------------------------------------------------------------------------------------------------------------------------------------------------------------------------------------|

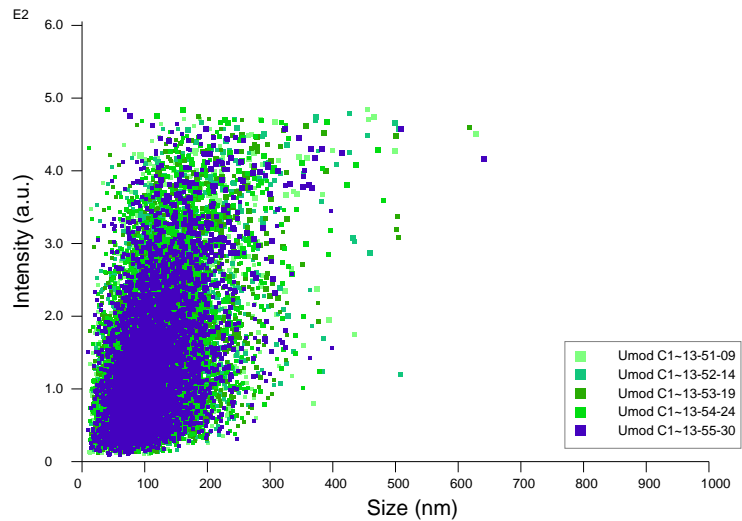

Intensity / Size graph for Experiment:  
Umod C126 5 60 120 2000x 2026-03-09 13-47-44

**Script Used: (Full Text):**

SOP Standard Measurement 01-47-42PM 09Mar2026.txt
