# Supplementary material
Source: Research Square preprint supplement (doi:10.21203/rs.3.rs-9703493/v1)
Supplement: Supplementary file [file Additional file 1.pdf › Additional files/Additional file 1.pdf]

**AAV-EV-CD9mE**

**AAV-EV**

**C1**

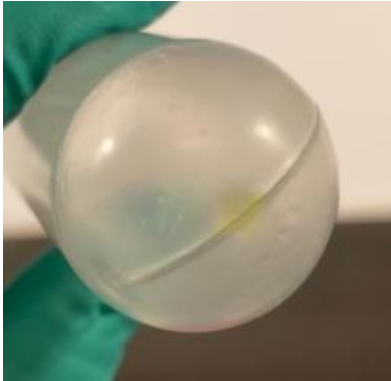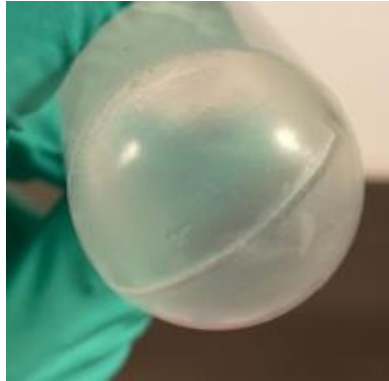

**C2**

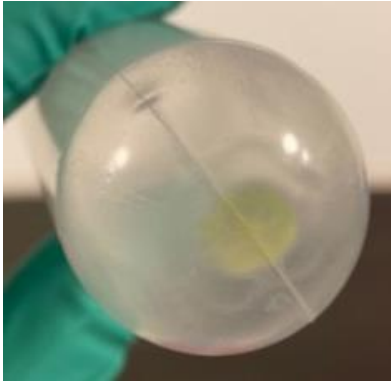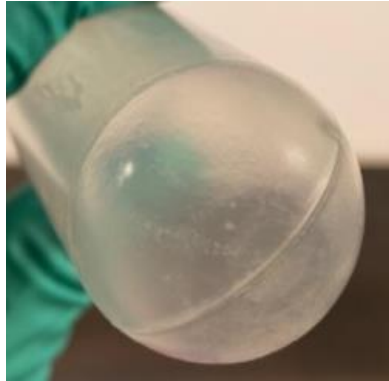

**P**

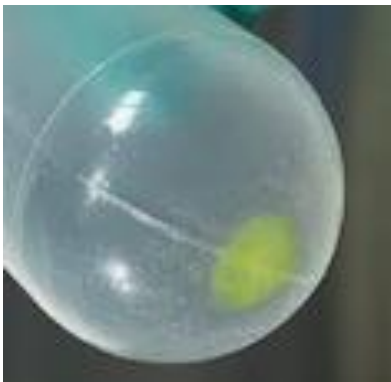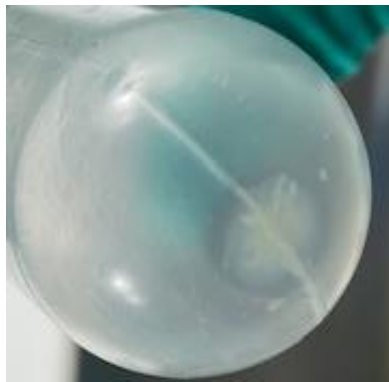

**Additional file 1 figure:** Images of AAV-EV and AAV-EV-CD9mE (tagged CD9 with mEmerald) pellets from individual collections (C1 and C2) and pooled (P) collections after centrifugation at 100,000×g for 90 min.
