# Supplementary material
Source: Research Square preprint supplement (doi:10.21203/rs.3.rs-9703493/v1)
Supplement: Supplementary file [file Additional file 3.pdf › Additional files/Additional file 3.pdf]

A

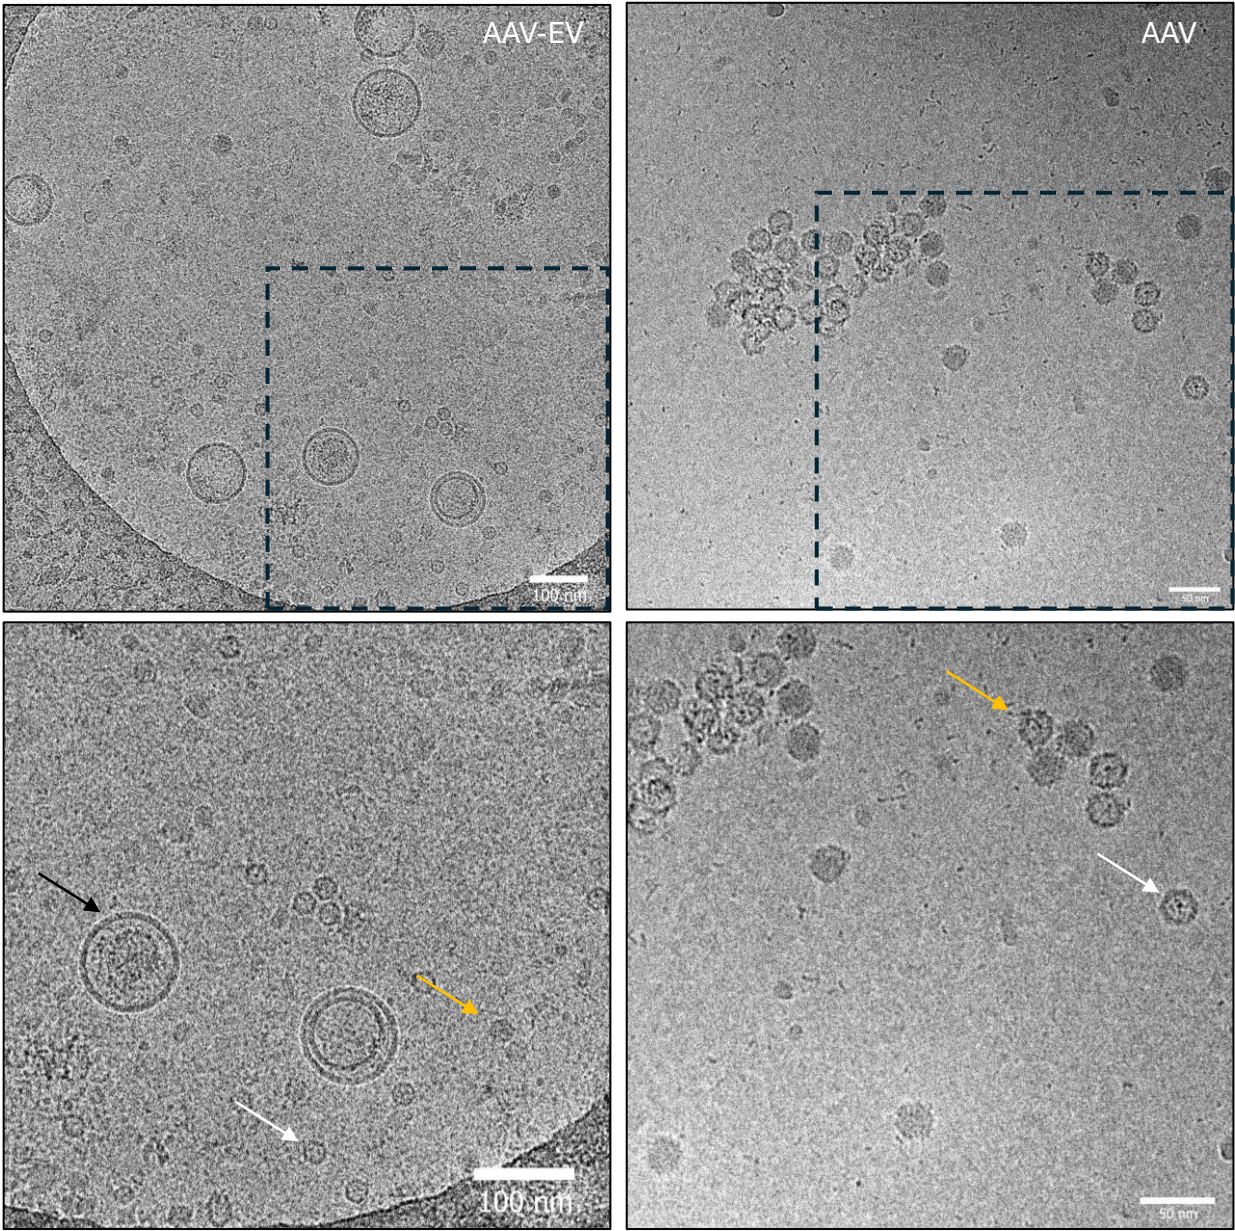

B

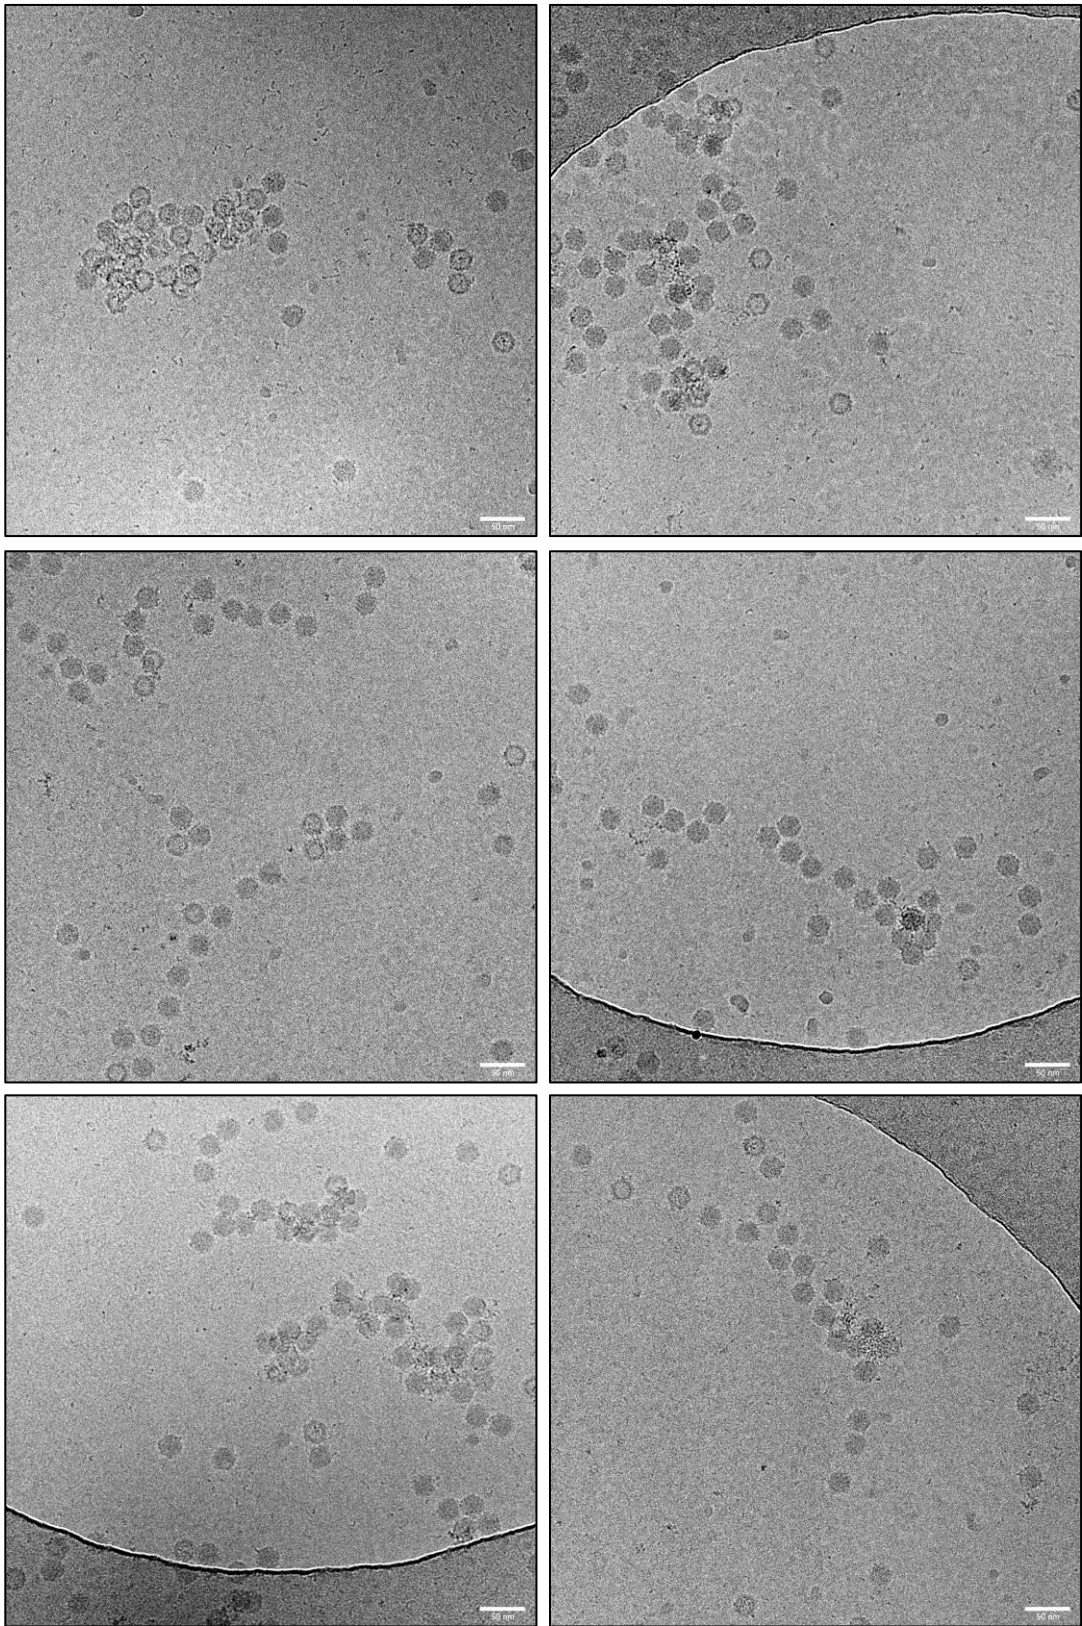



B

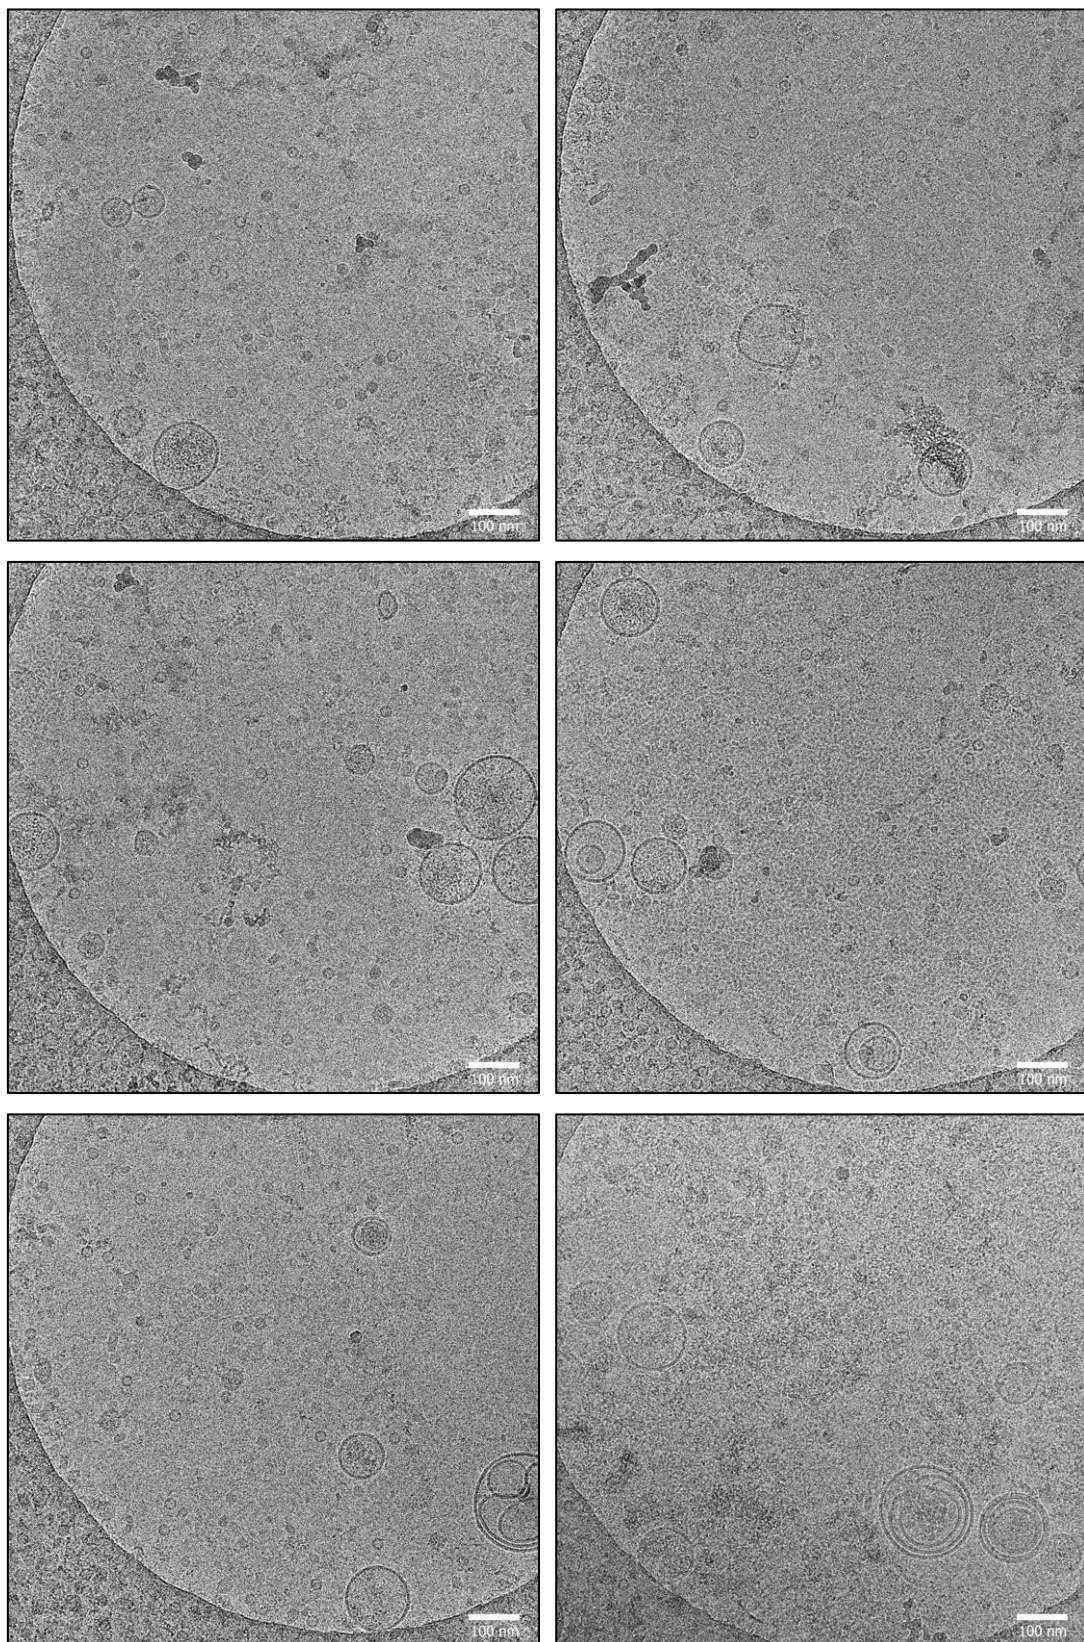

**Additional file 3 figure: CryoEM structural analysis of formulations** (A) AAV-EV and AAVs formulations; empty AAV capsid (white arrow), full AAV capsid (yellow arrow), vesicle (black arrow), (B) Additional images of AAV formulations. (C) Additional images of AAV-EV formulations.
