# Supplementary material
Source: Research Square preprint supplement (doi:10.21203/rs.3.rs-9703493/v1)
Supplement: Supplementary file [file Additional file 8.pdf › Additional files/Additional file 8.pdf]

A) C57BL/6NCrI-Ube3a<sup>em2</sup>(BioID2)Ccpcz

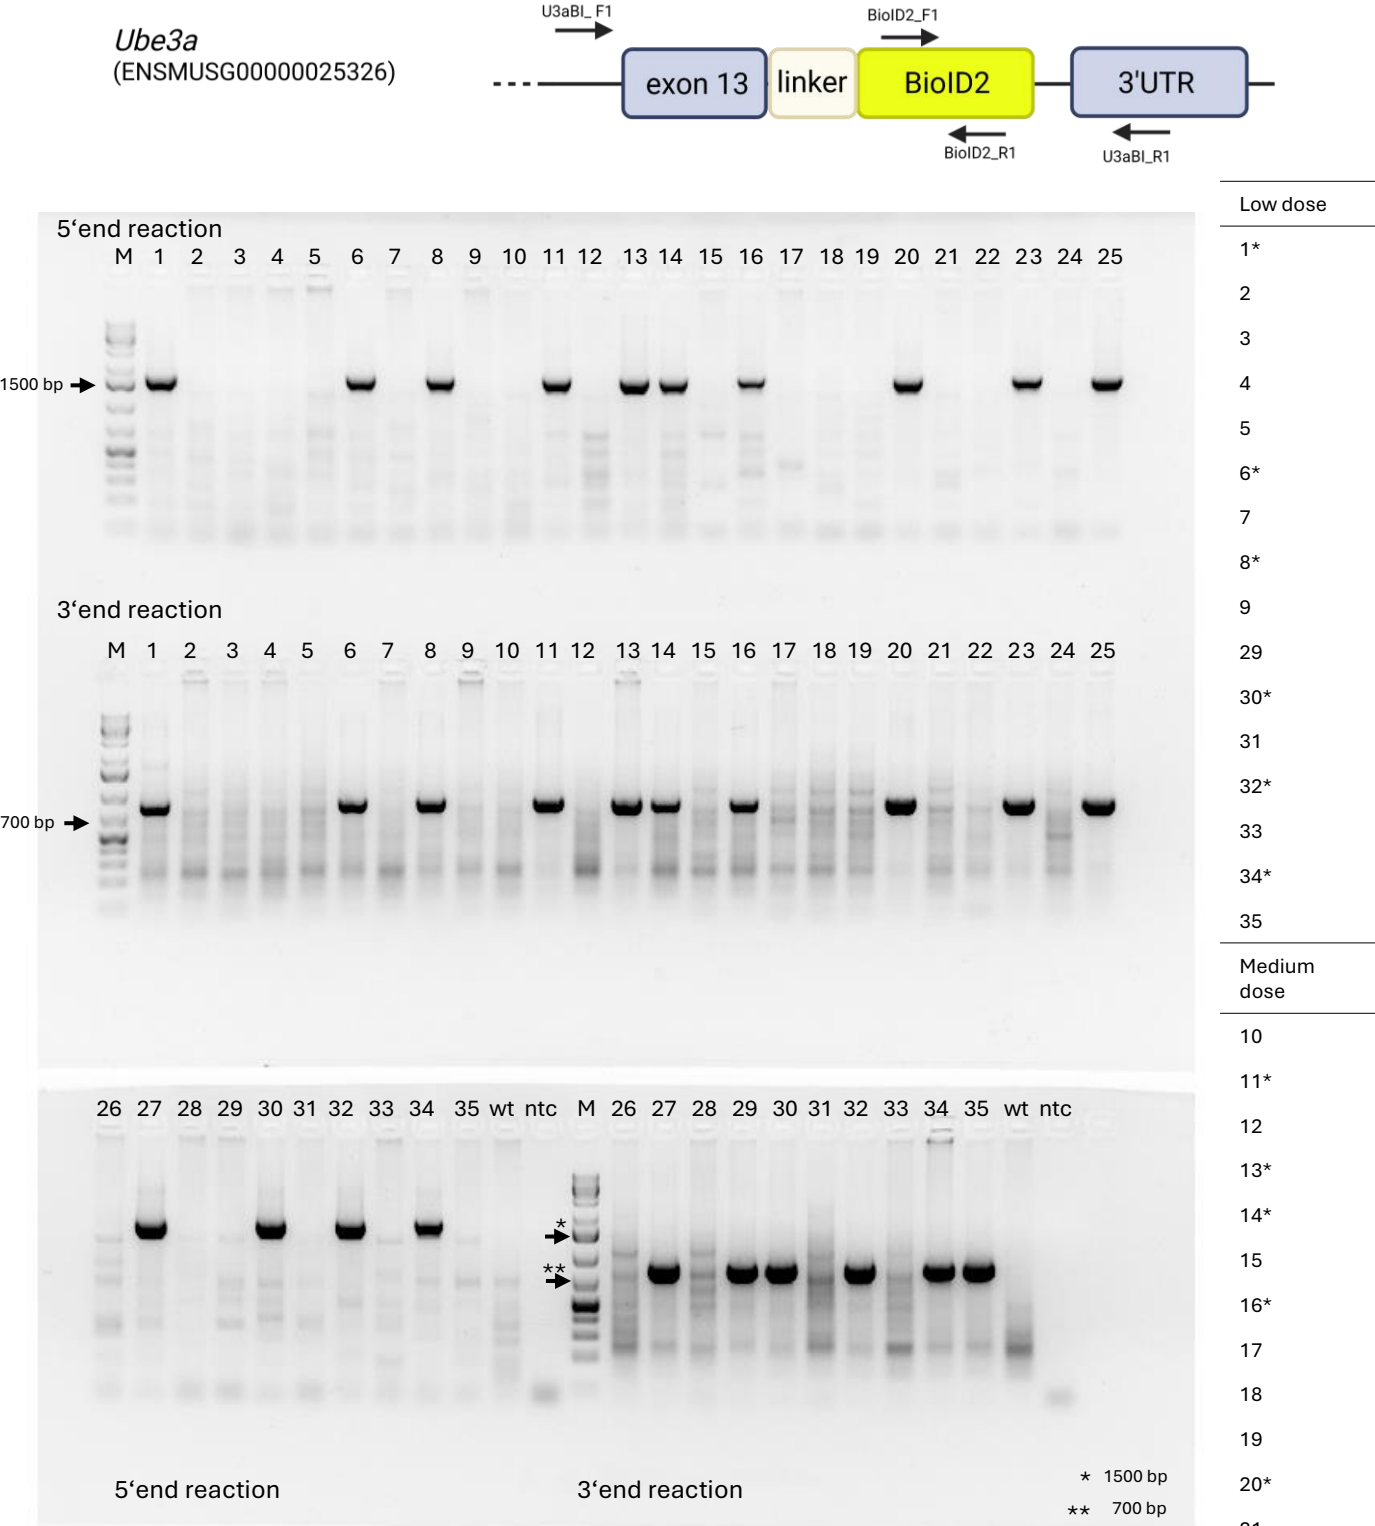

| 5'reaction | Primers sequence (5'>3') | Product size (bp) |
|------------|--------------------------|-------------------|
| U3aBI_F1   | CCATATTCCATACACGCAAGCAG  | 1672              |
| BioID2_R1  | TCGCCAGGTACAGCATC        |                   |
| 3'reaction | Primers sequence (5'>3') | Product size (bp) |
| U3aBI_R1   | CCAATGAAGAAGGGAGGCAC     | 863               |
| BioID2_F1  | ACCCAGGAGAGACTGAAGG      |                   |

B) C57BL/6NCrI-Sox2<sup>em1</sup>(P2A-mStrawberry)Ccpcz

Sox2  
(ENSMUSG00000074637)

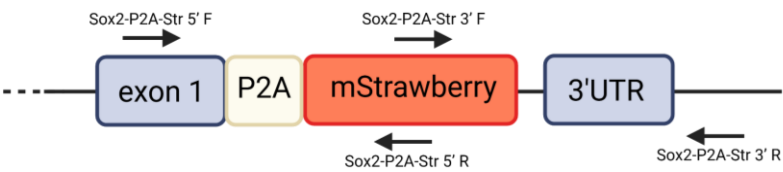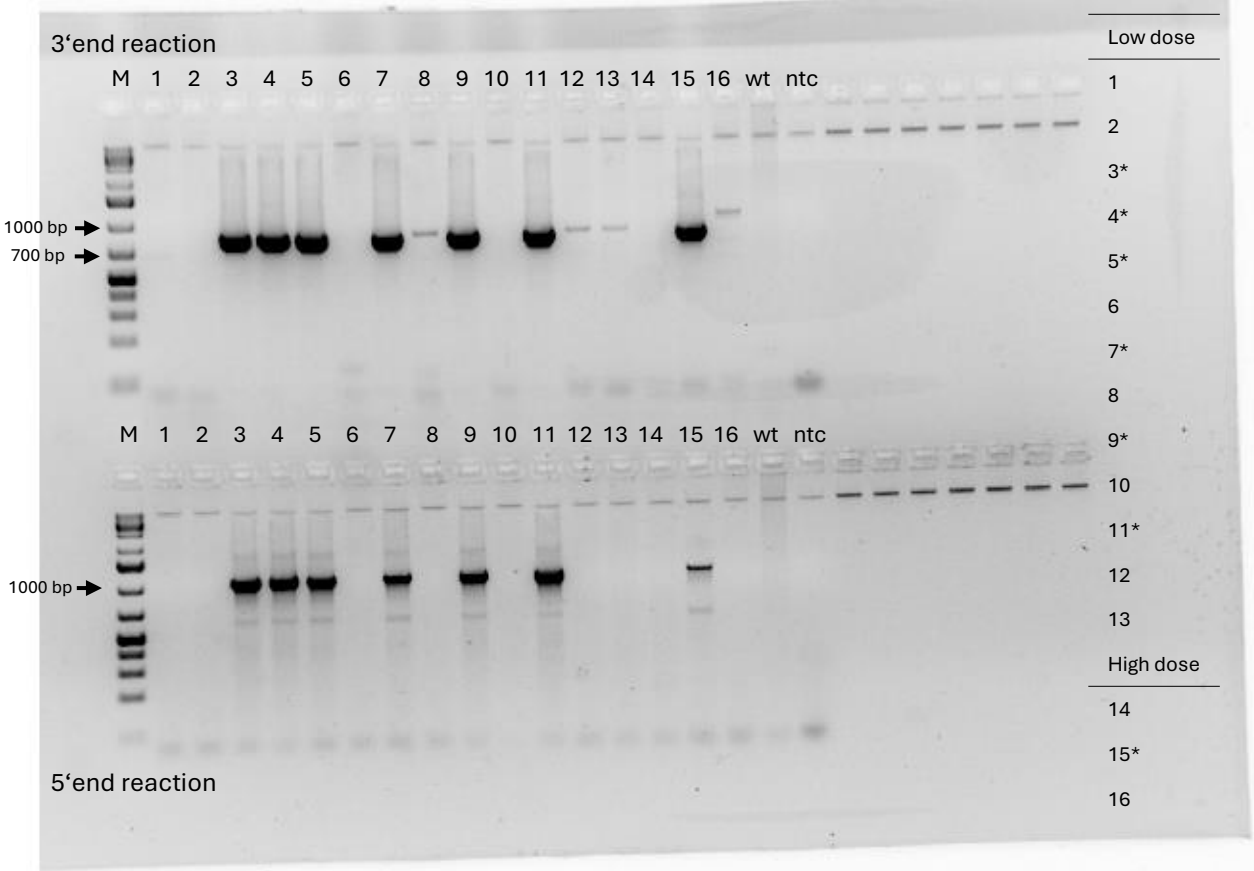

| 3'reaction        | Primers sequence (5'>3') | Product size (bp) |
|-------------------|--------------------------|-------------------|
| Sox2-P2A-Str 3' F | GCAGAAGAAGACCATGGGCT     | 836               |
| Sox2-P2A-Str 3' R | CCCAGCAAGAACCCTTTCCT     |                   |
| 5'reaction        | Primers sequence (5'>3') | Product size (bp) |
| Sox2-P2A-Str 5' F | TAAGTACACGCTTCCCGGAG     | 1088              |
| Sox2-P2A-Str 5' R | AGCCCATGGTCTTCTTCTGC     |                   |

C) C57BL/6NCrI-Lck<sup>em2Ccpcz</sup> (loxP insertion)

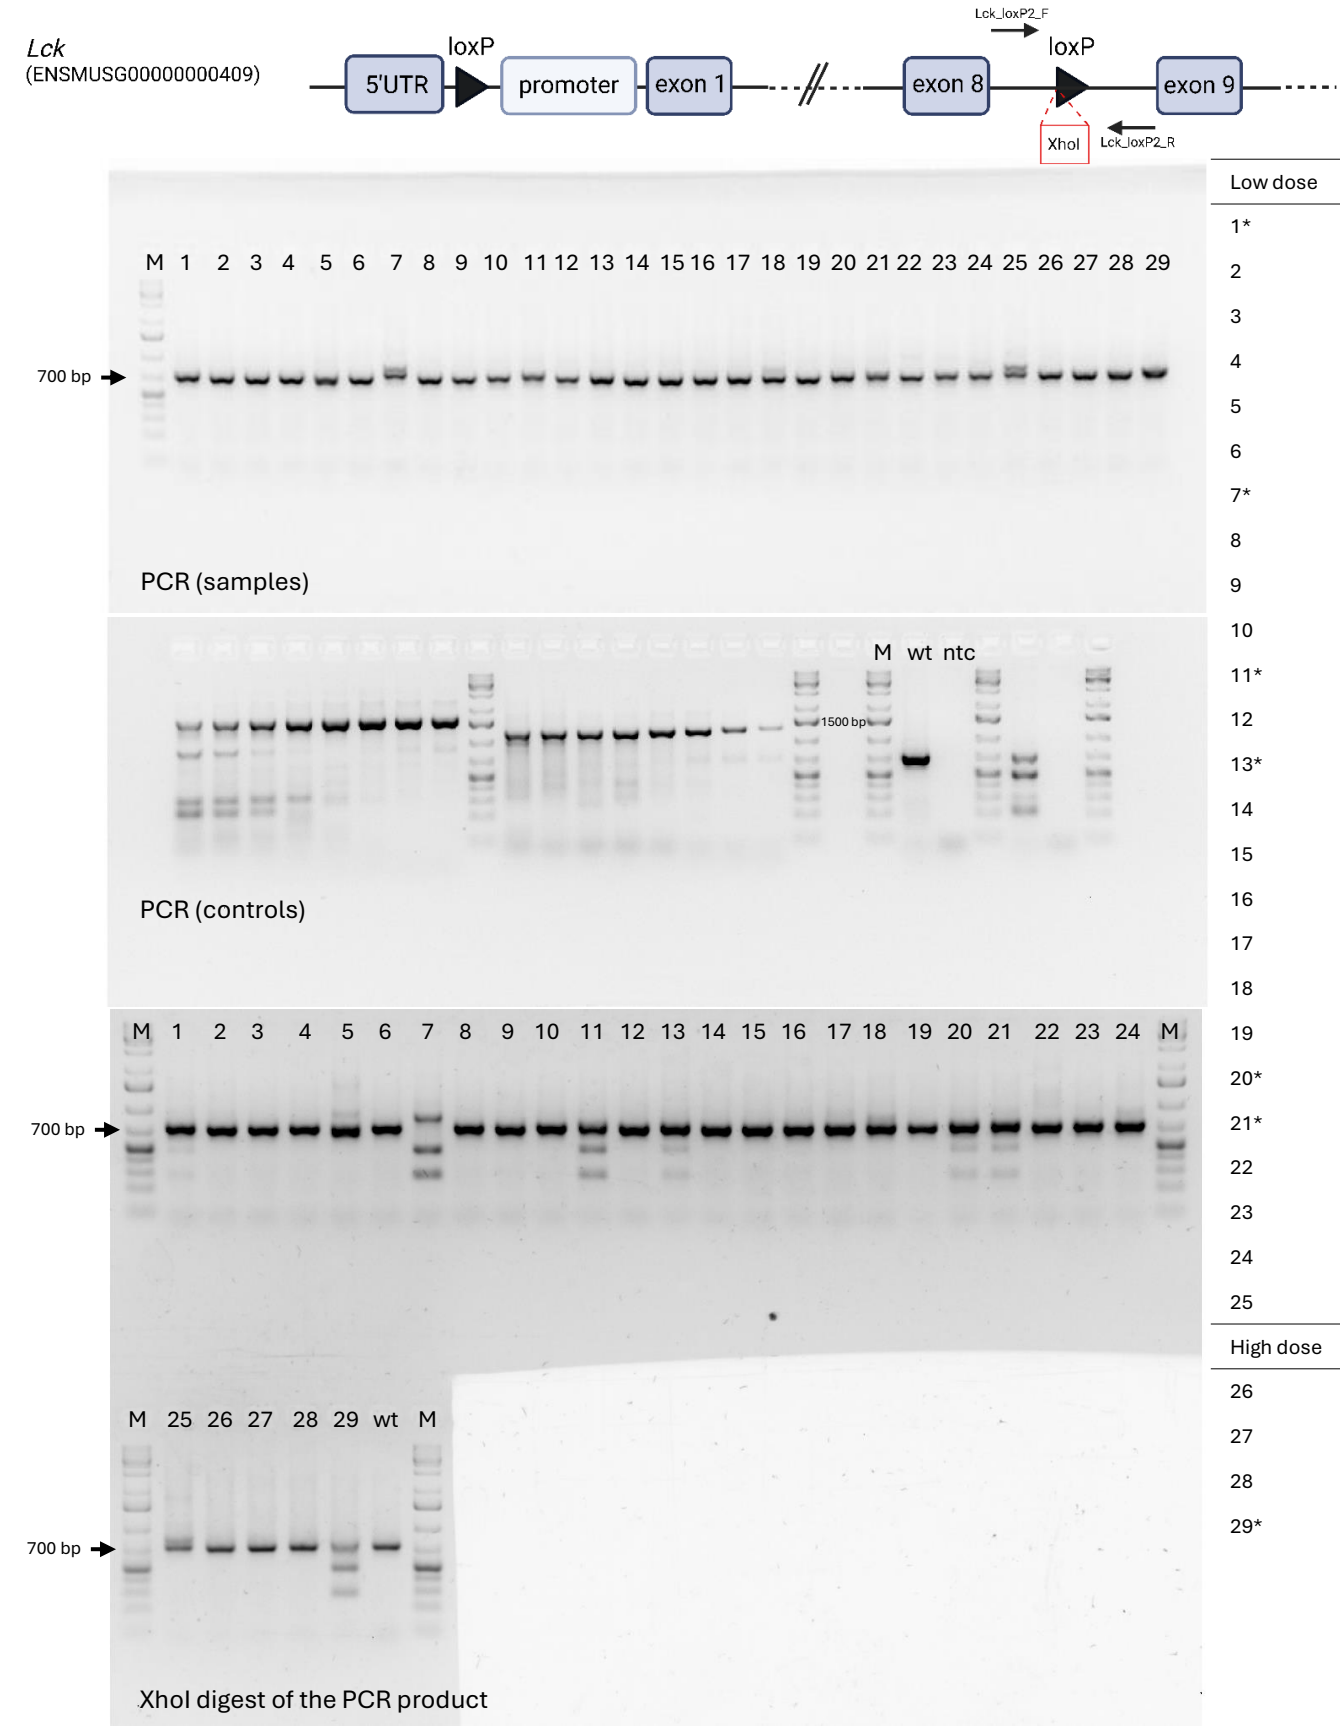

| PCR reaction   | Primers sequence (5'>3')                                          | Product size (bp)     |
|----------------|-------------------------------------------------------------------|-----------------------|
| Lck_loxP2_F    | TTGCTGACAAGCCTGATGAGC                                             | 713 (wt), 753 (+loxP) |
| Lck_loxP2_R    | TGGGAACATCCCTAGGTCACAA                                            |                       |
| XhoI digestion | WT product – no digestion, Lck cKO loxP2 – 274 + 479 bp fragments |                       |

D) C57BL/6NCrI-Actn1<sup>em1Ccpcz</sup>

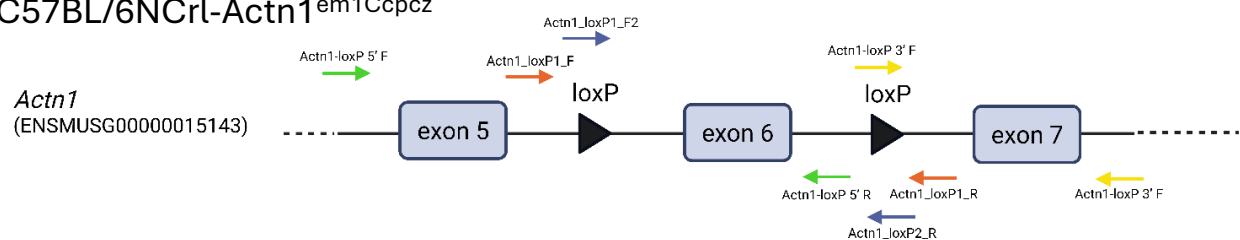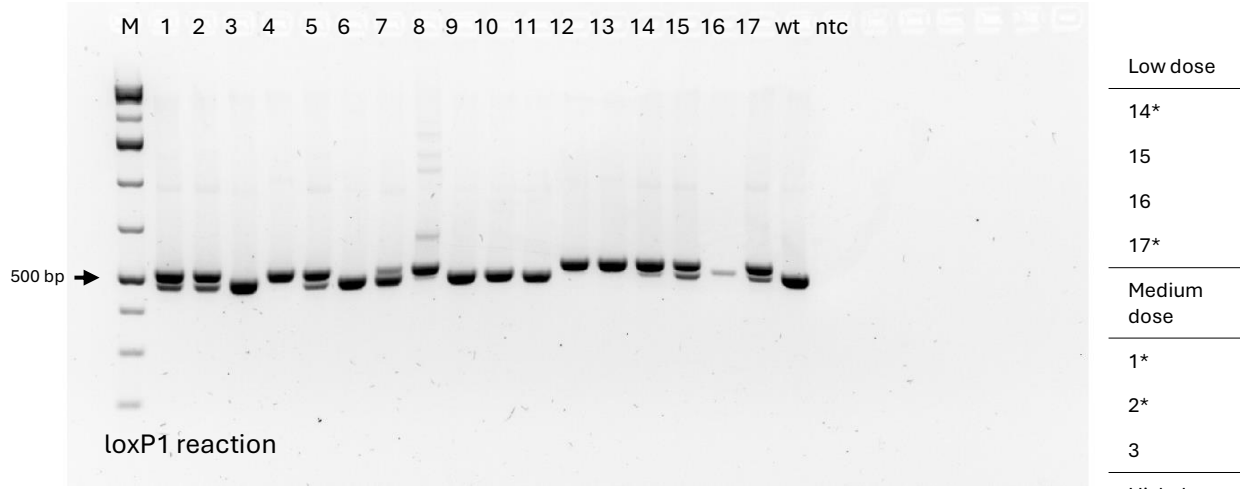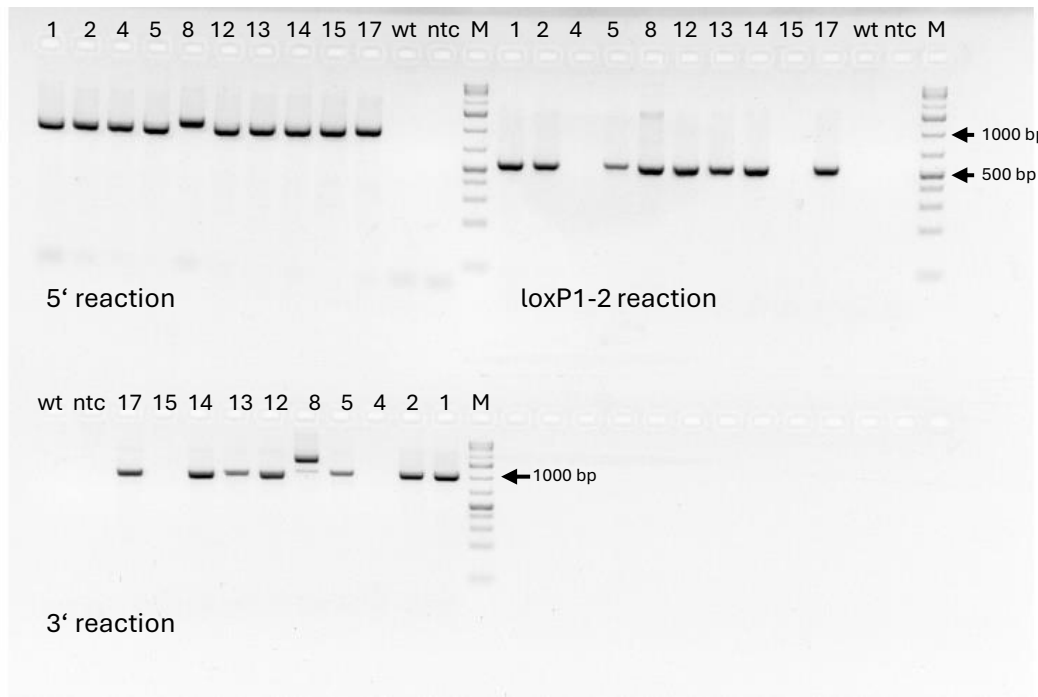

| loxP1 reaction         | Primers sequence (5'>3') | Product size (bp)    |
|------------------------|--------------------------|----------------------|
| <u>Actn1_loxP1_F</u>   | ACACTGTCAAGACCCCAAG      | 420 (wt)/524 (loxP1) |
| <u>Actn1_loxP1_R</u>   | TGTAGCTGGTCCATAAGGCCAA   |                      |
| 5' reaction            | Primers sequence (5'>3') | Product size (bp)    |
| <u>Actn1-loxP 5' F</u> | AGTTCACAGATCTGAACACACG   | 874                  |
| <u>Actn1-loxP 5' R</u> | ATTGAGCAAGAGAGGACAGC     |                      |
| 3' reaction            | Primers sequence (5'>3') | Product size (bp)    |
| <u>Actn1-loxP 3' F</u> | TGTTACCCAGCGATAACTTCG    | 1060                 |
| <u>Actn1-loxP 3' F</u> | ACATATGAGACAGTCTGTGAC    |                      |
| loxP1-2 reaction       | Primers sequence (5'>3') | Product size (bp)    |
| <u>Actn1_loxP1_F2</u>  | GCTTTAGTGAACGATAACTTCG   | 559                  |
| <u>Actn1_loxP2_R</u>   | CGGGATGTGCAATAACTTCGT    |                      |

E) C57BL/6NCrl-Nes<sup>em1</sup>(rtTA3,DTR,iRFP670)Ccpcz

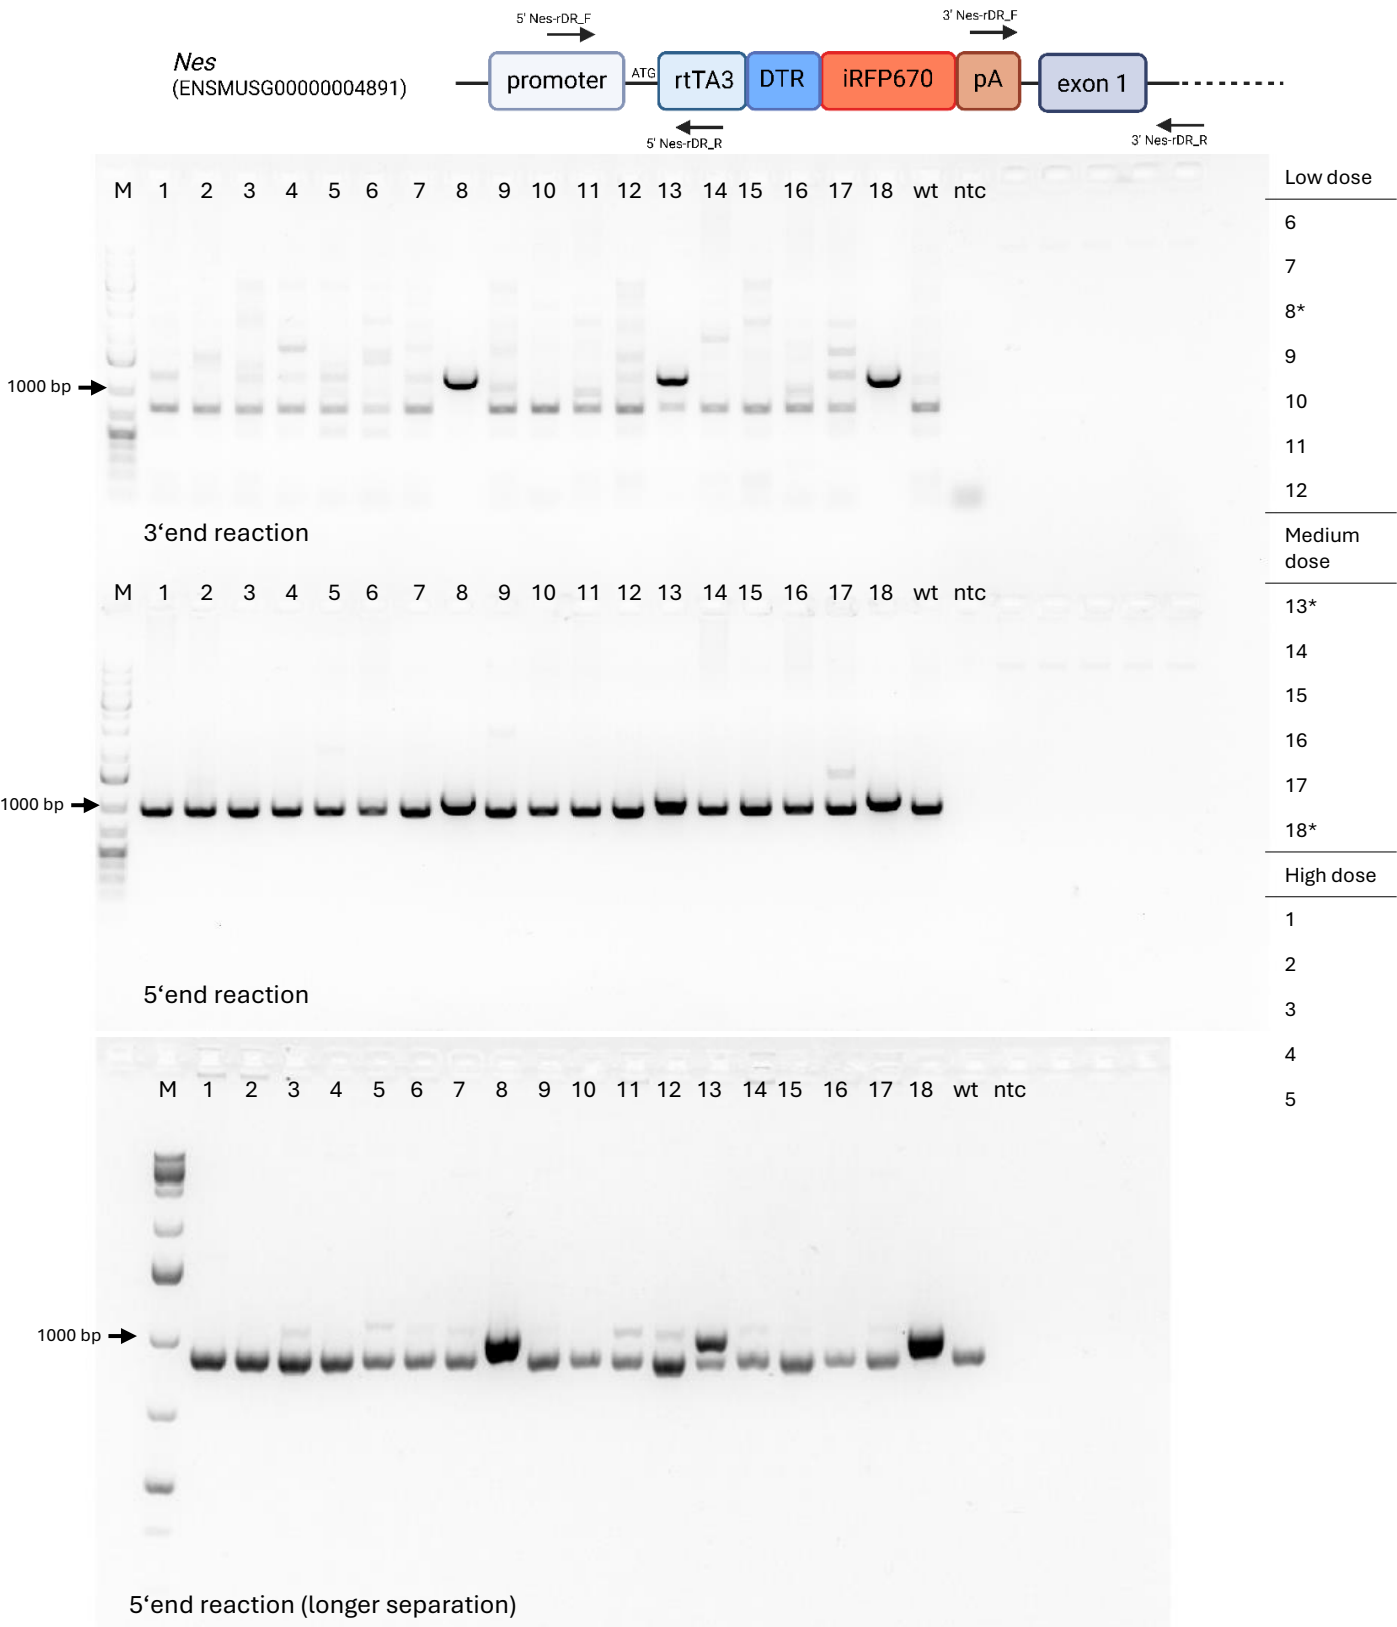

| 3'reaction   | Primers sequence (5'>3') | Product size (bp) |
|--------------|--------------------------|-------------------|
| 3' Nes-rDR_F | TGCGGGGTCTATTGGGAAC      | 1154              |
| 3' Nes-rDR_R | CTGAAGGTCTCTTGCCATCCT    |                   |
| 5'reaction   | Primers sequence (5'>3') | Product size (bp) |
| 5' Nes-rDR_F | AGCCGCGTAACTTCTTCACT     | 1026              |
| 5' Nes-rDR_R | AACTCCCAGCTTTTGAGCGA     |                   |

F) C57BL/6NCrl-Dpp4<sup>em1</sup>(rtTA3,DTR,mKate)Ccpcz

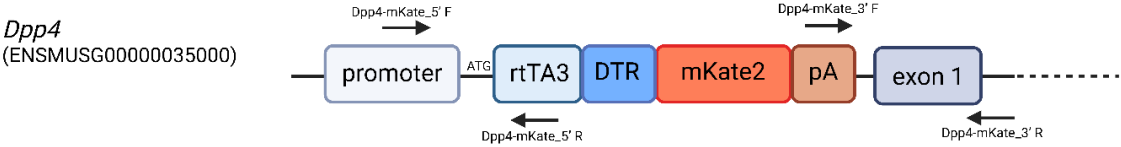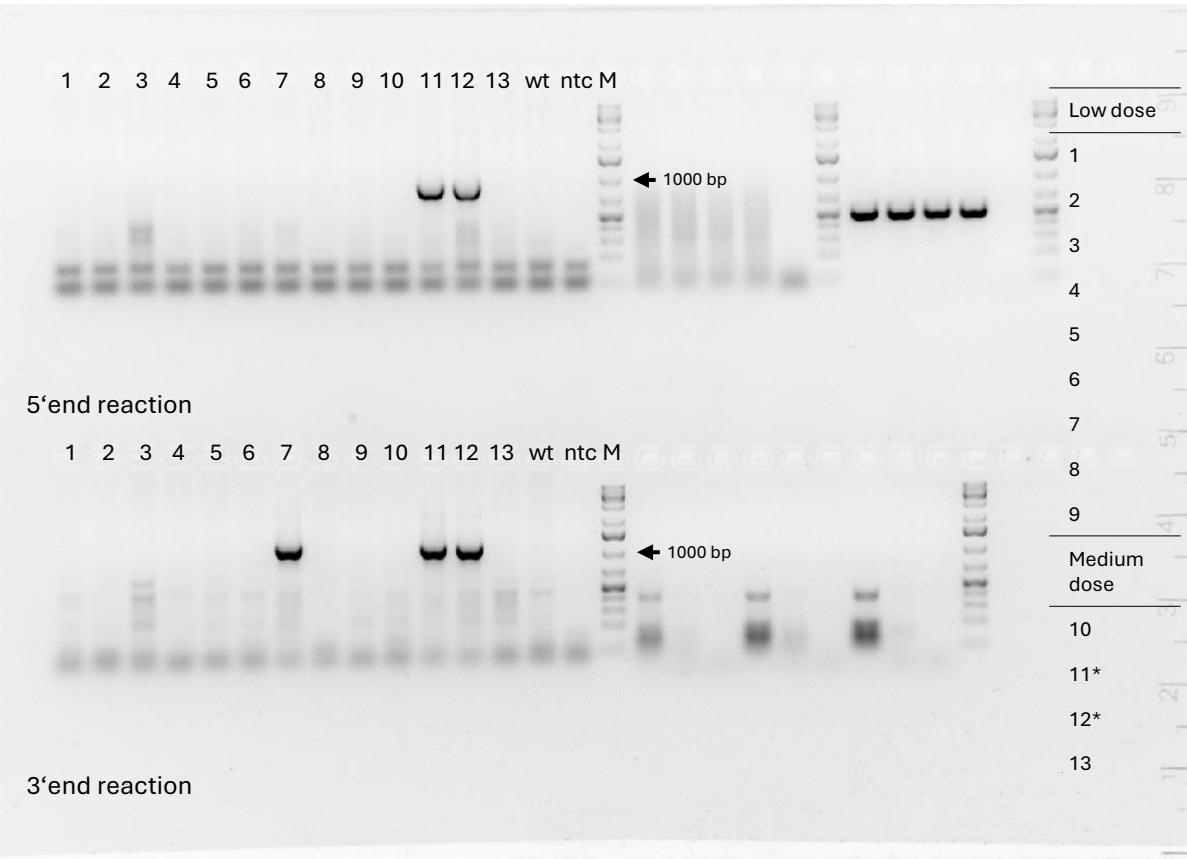

| 3'reaction      | Primers sequence (5'>3') | Product size (bp) |
|-----------------|--------------------------|-------------------|
| Dpp4-mKate_3' F | CTGCGGGGTCTATTGGGAAC     | 1213              |
| Dpp4-mKate_3' R | TGGGTCTTCAAAAGCTGCCT     |                   |
| 5'reaction      | Primers sequence (5'>3') | Product size (bp) |
| Dpp4-mKate_5' F | CCTCTCAGGGAAGGGGACAAG    | 938               |
| Dpp4-mKate_5' R | GAAGTGGGGGCATAGAATCGG    |                   |

G) C57BL/6NCrI-Batf3<sup>em1(iCre,eGFP)</sup>Ccpcz

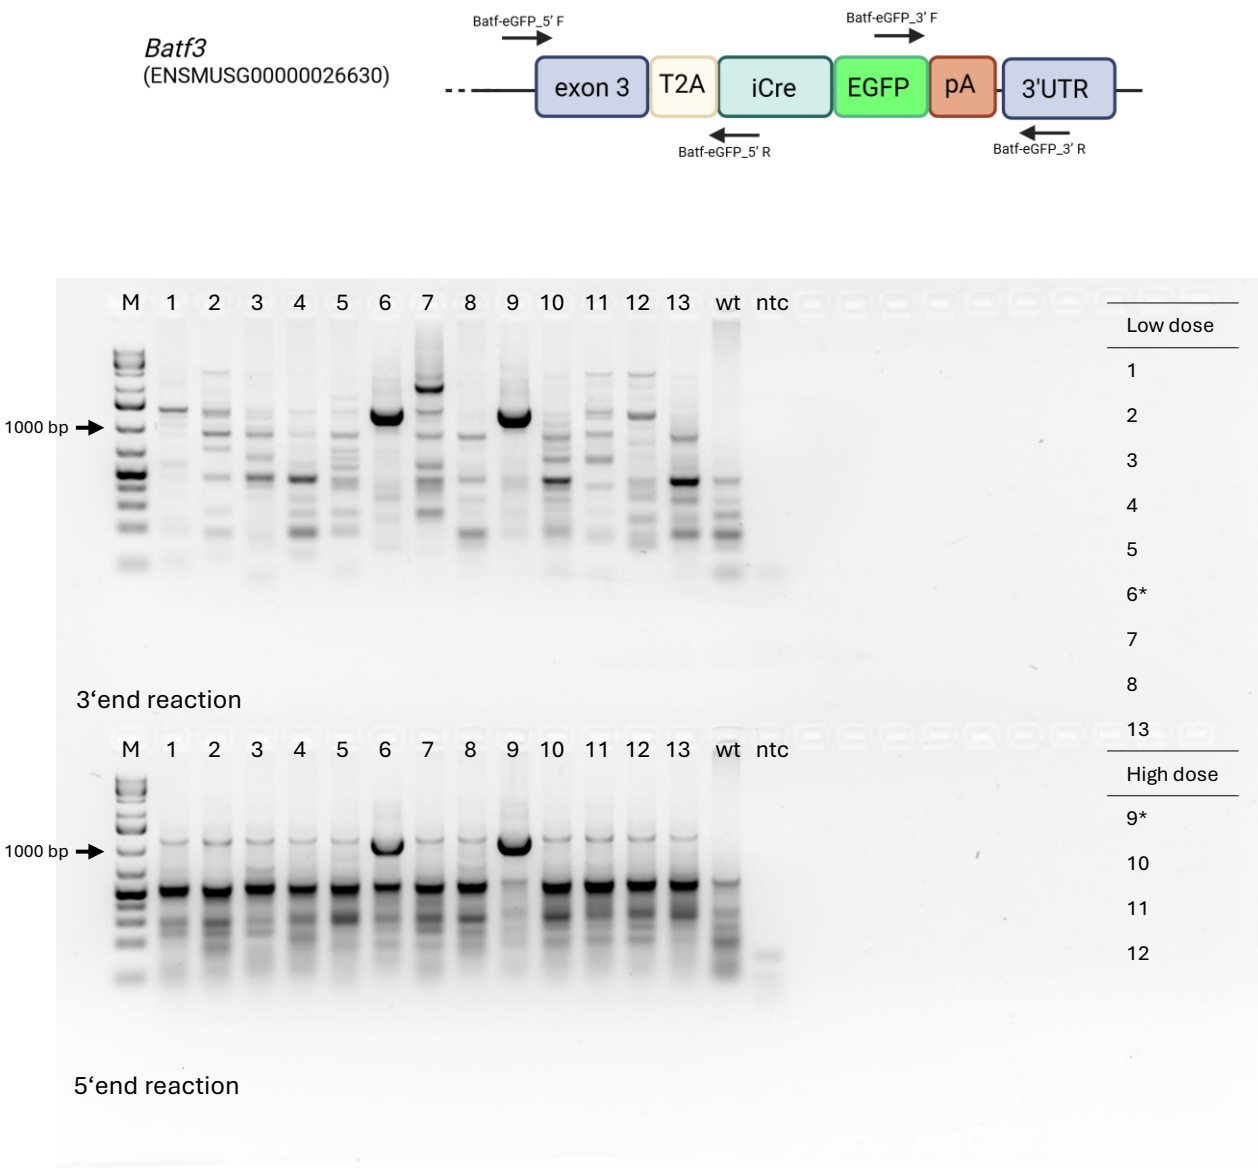

| 3'reaction     | Primers sequence (5'>3') | Product size (bp) |
|----------------|--------------------------|-------------------|
| Batf-eGFP_3' F | CACATGGTCCTGCTGGAGTT     | 1350              |
| Batf-eGFP_3' R | TGCAAGAAGAATGGGCACCT     |                   |
| 5'reaction     | Primers sequence (5'>3') | Product size (bp) |
| Batf-eGFP_5' F | GAACTTGTAAGGGCGAGGGA     | 1103              |
| Batf-eGFP_5' R | ATCAGAGGTGGCATCCACAG     |                   |

H) C57BL/6NCrl-Alox5ap<sup>em1</sup>(CCre, CGFP)Ccpcz

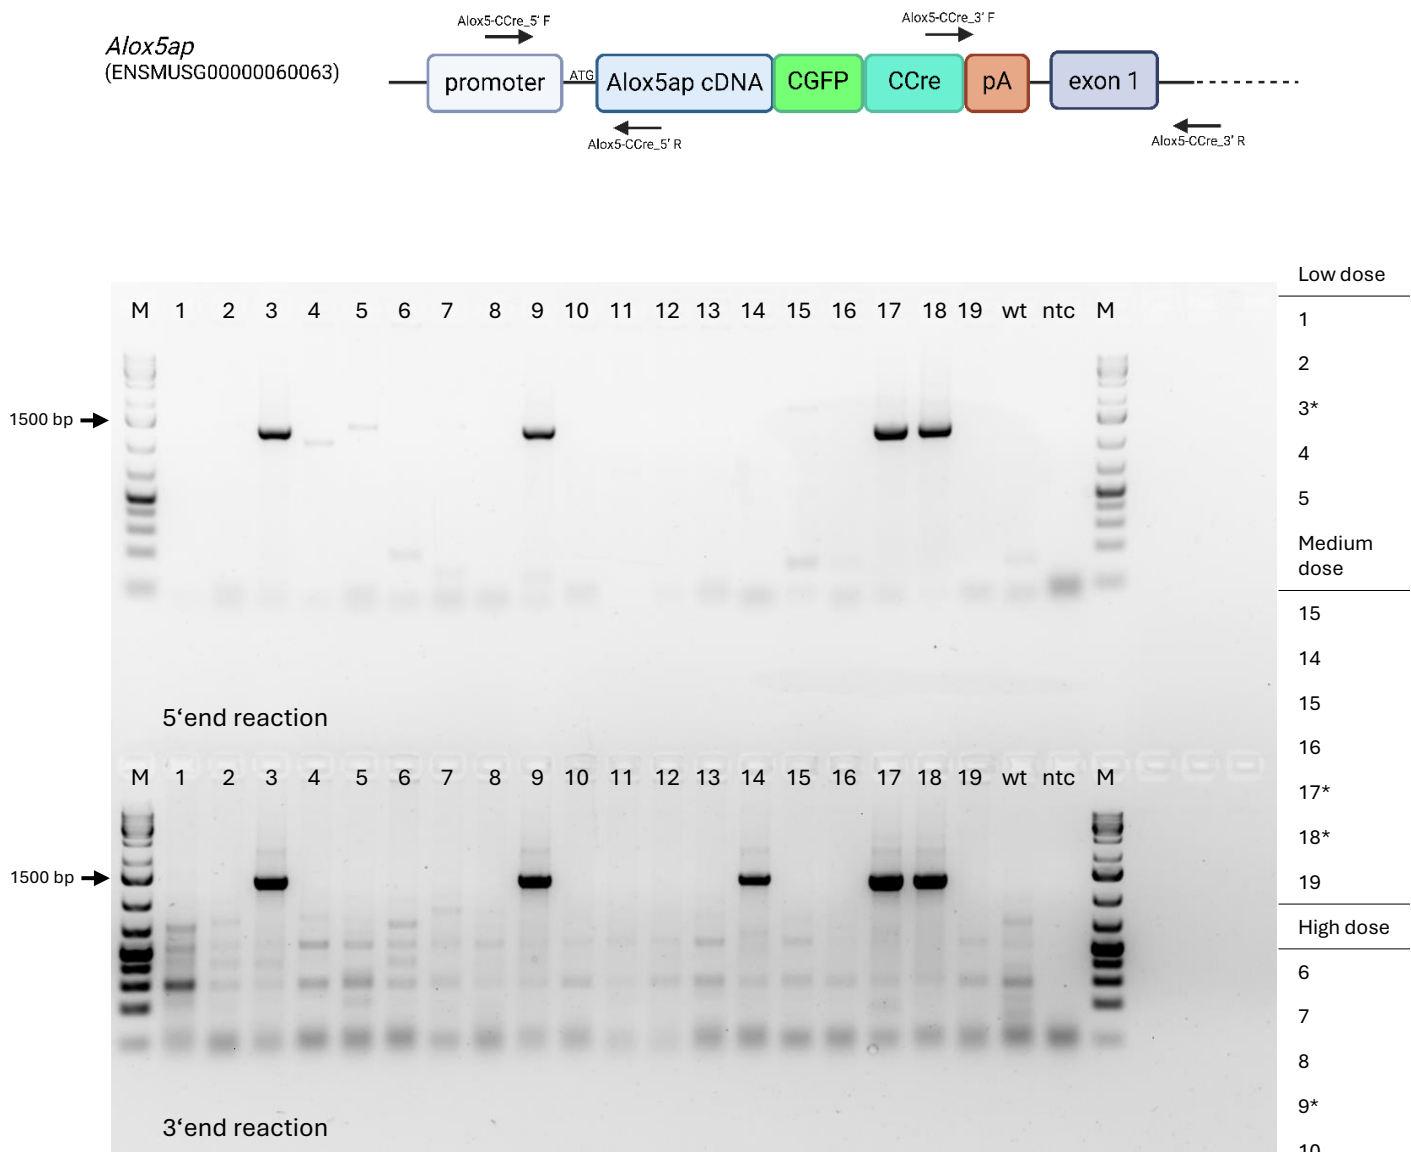

| 3'reaction      | Primers sequence (5'>3') | Product size (bp) |
|-----------------|--------------------------|-------------------|
| Alox5-CCre_3' F | CTCGAGGATGGGGACTGATG     | 1358              |
| Alox5-CCre_3' R | ACTGTGTCAAAGGGCTAGGA     |                   |
| 5'reaction      | Primers sequence (5'>3') | Product size (bp) |
| Alox5-CCre_5' F | CCTGCCCTCTTCTGTAAT       | 1340              |
| Alox5-CCre_5' R | GGCAAAGAACGCATTCTGGA     |                   |



I) C57BL/6NCrI-Lyve<sup>em1</sup>(NCre, NGFP)Ccpcz

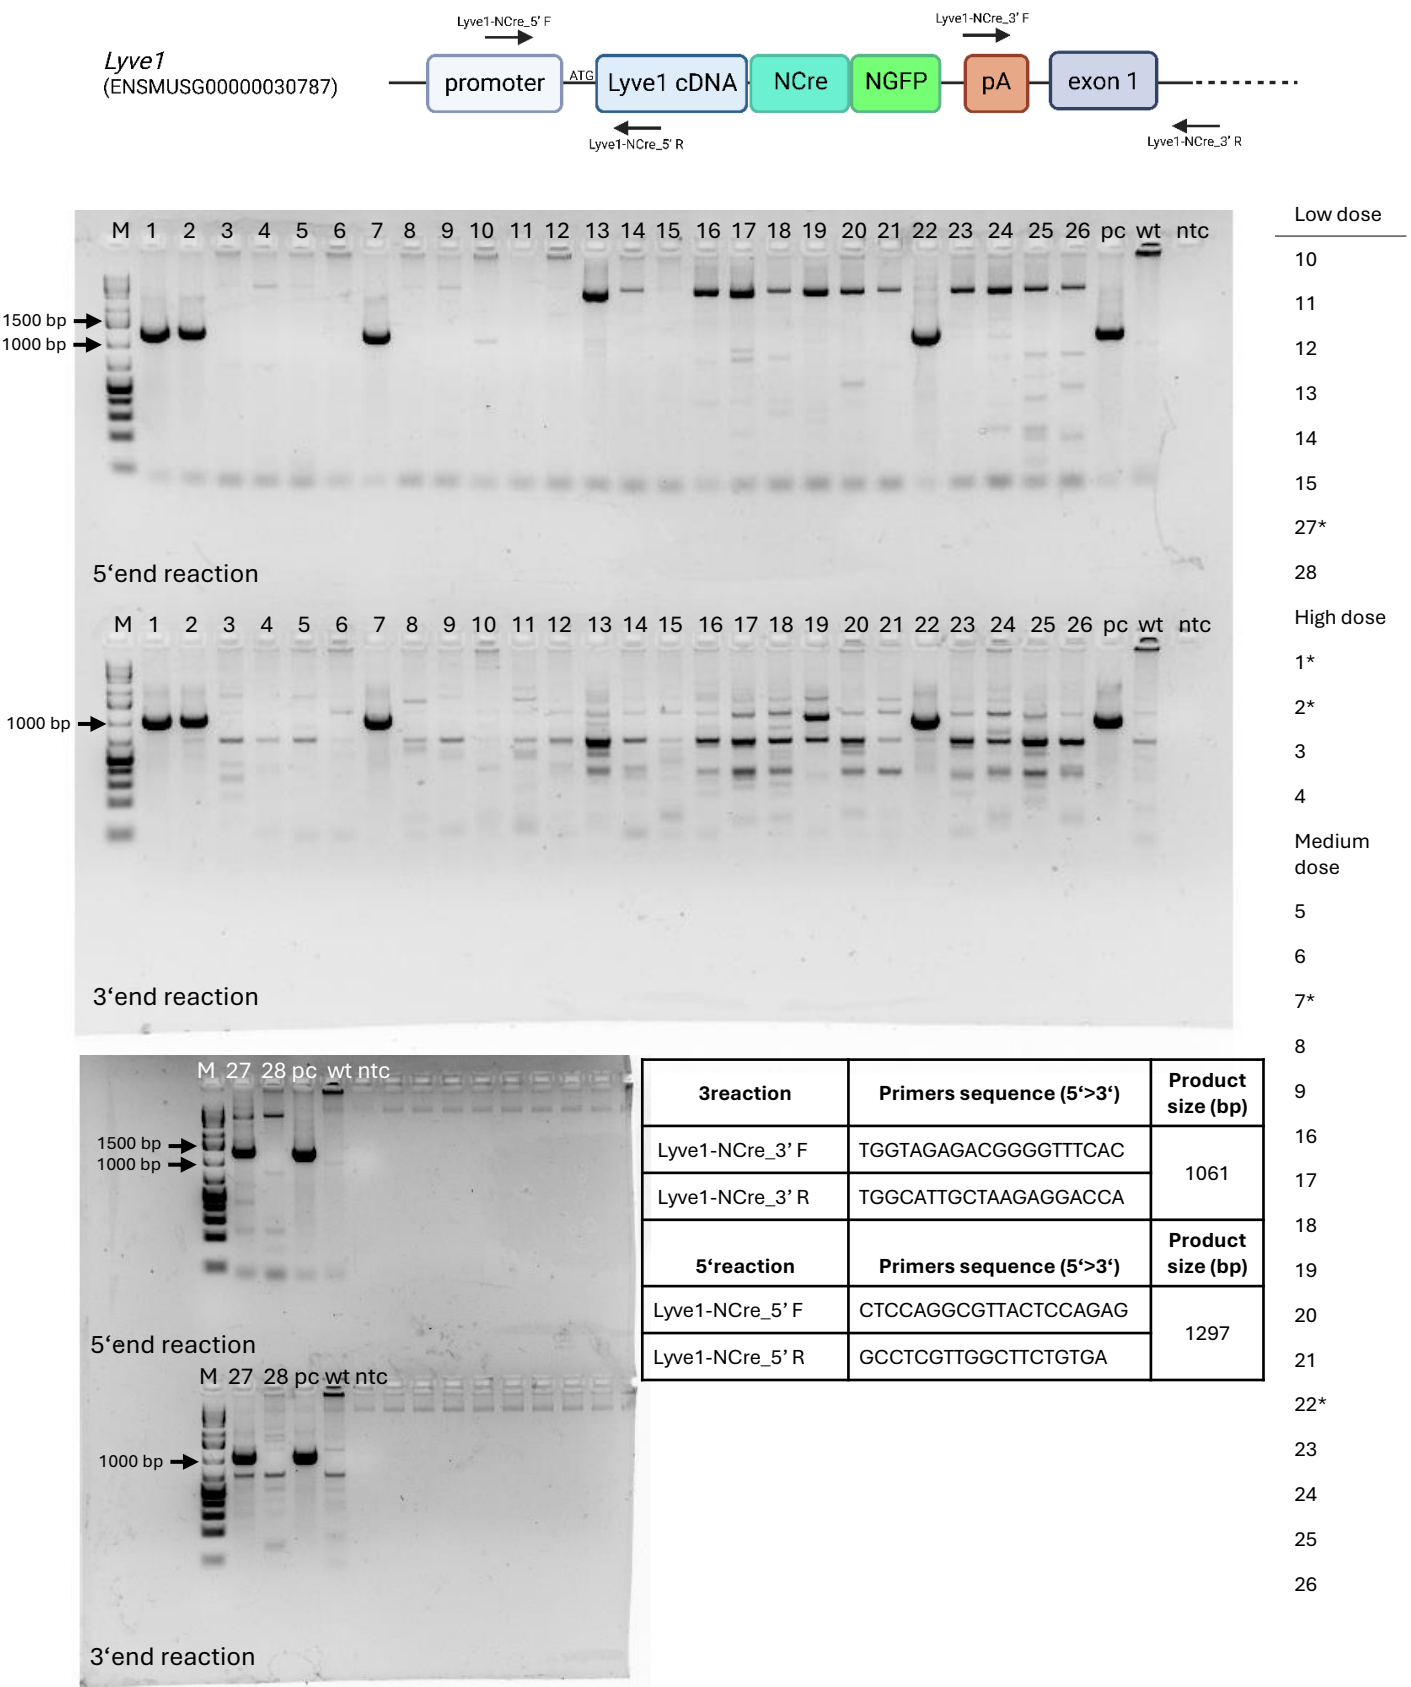

J) C57BL/6NCrl-Sox2<sup>em1</sup>(P2A-mStrawberry)Ccpcz

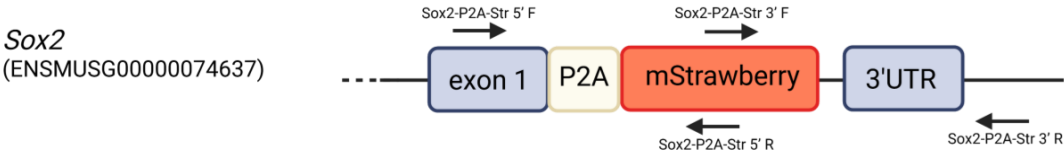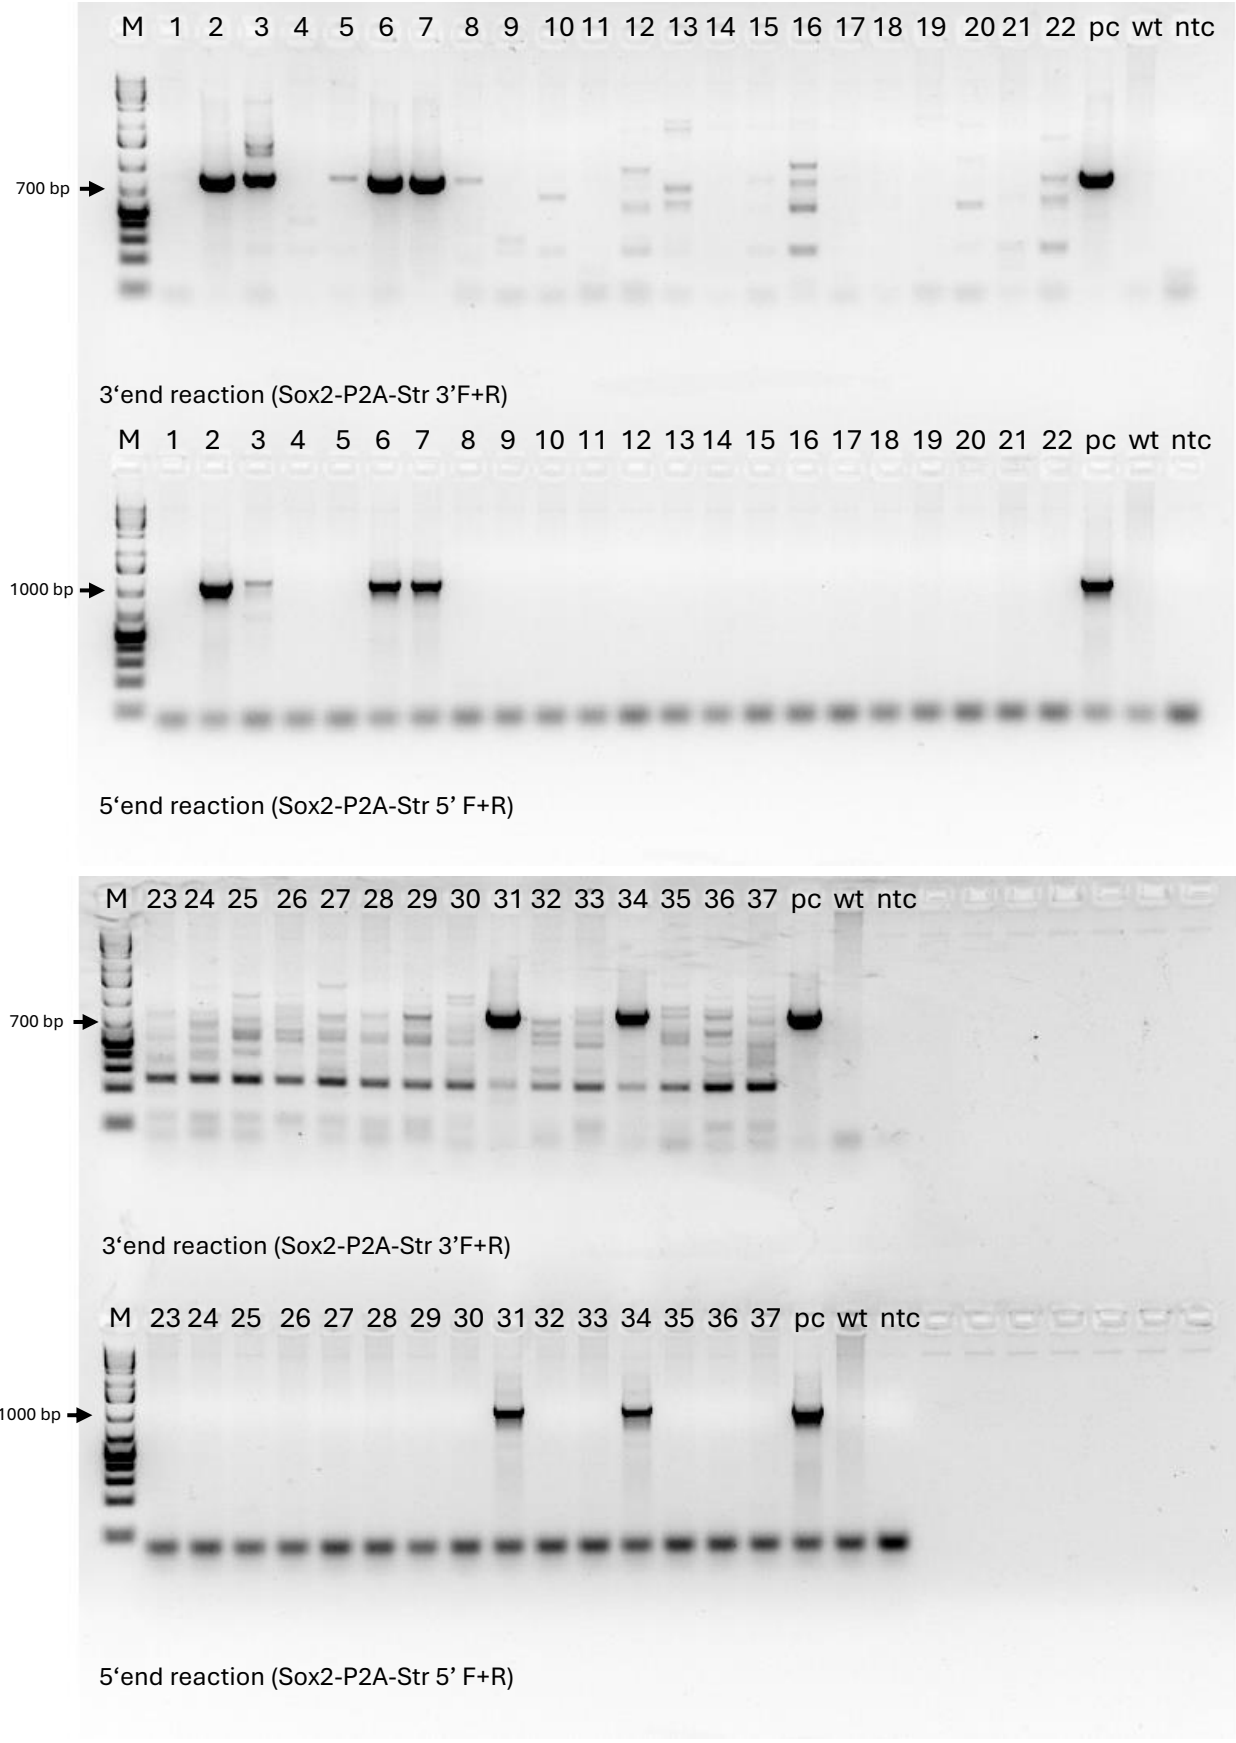

| AAV<br>Medium<br>dose    |
|--------------------------|
| 1                        |
| 2                        |
| 3*                       |
| 4*                       |
| AAV-EV<br>Low dose       |
| 5                        |
| 6*                       |
| 7*                       |
| 8                        |
| 9                        |
| 10                       |
| 11                       |
| 12                       |
| 13                       |
| 14                       |
| 15                       |
| 16                       |
| 35                       |
| 36                       |
| 37                       |
| AAV-EV<br>Medium<br>dose |
| 17                       |
| 18                       |
| 19                       |
| 20                       |
| 21                       |
| 22                       |
| 29                       |
| 30                       |
| 31*                      |
| 32                       |
| 33                       |
| 34*                      |
| AAV-EV<br>High dose      |
| 25                       |
| 26                       |
| 27                       |
| 28                       |

K) C57BL/6NCrI-Alb<sup>em6</sup>(Cyp3a4,P2A,Ces1)Ccpcz

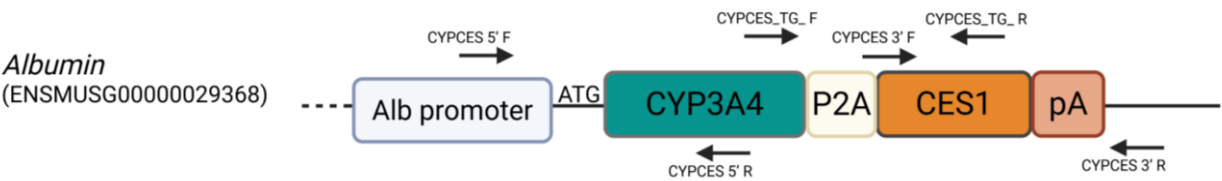

| 3'reaction   | Primers sequence (5'>3') | Product size (bp) |
|--------------|--------------------------|-------------------|
| CYP3ES 3'F   |                          | 836               |
| CYP3ES 3'R   |                          |                   |
| 5'reaction   | Primers sequence (5'>3') | Product size (bp) |
| CYP3ES 5'F   | CACCCCGAGAAAGAGGTTCA     | 689               |
| CYP3ES 5'R   | GCCAAGTCTGGGATGAGAGC     |                   |
| transgene    | Primers sequence (5'>3') | Product size (bp) |
| CYP3ES_TG_ F | CAAGGGATGGCACCGTAAGT     | 1420              |
| CYP3ES_TG_ R | GCTCCAGCATCTCTGTGGTT     |                   |

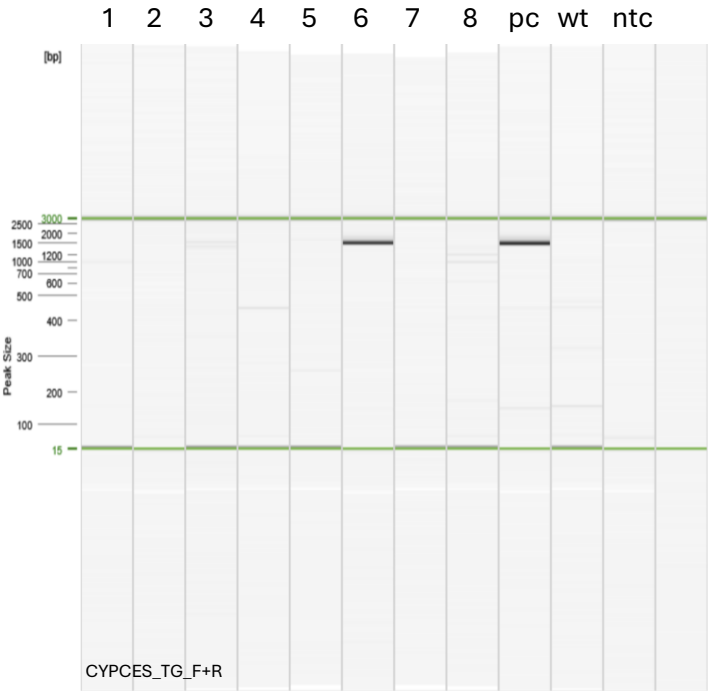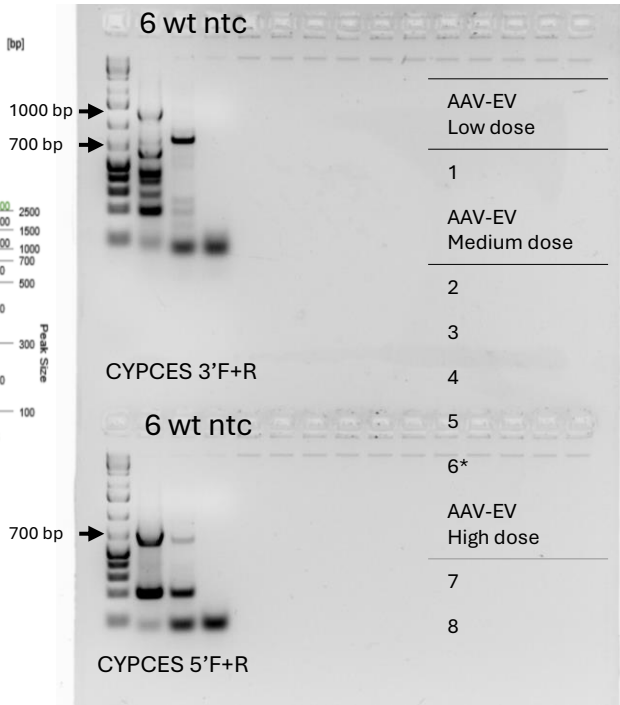

G1 genotyping

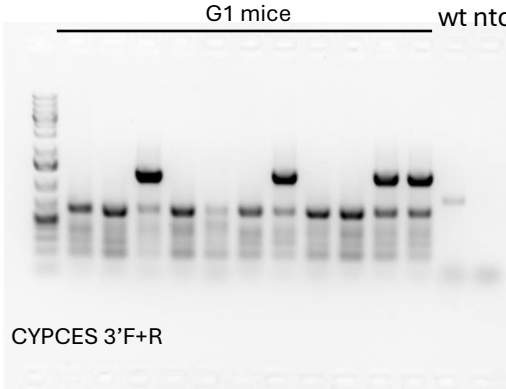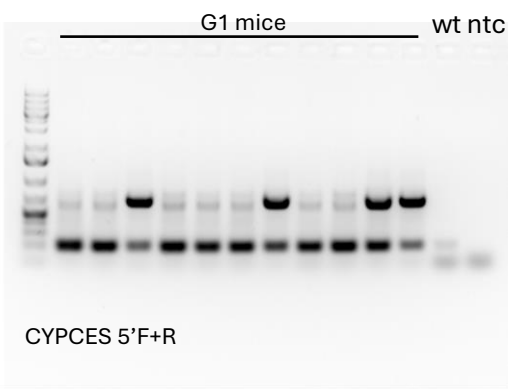

L) SD-Umod<sup>em1(C126R)Ccpcz</sup>

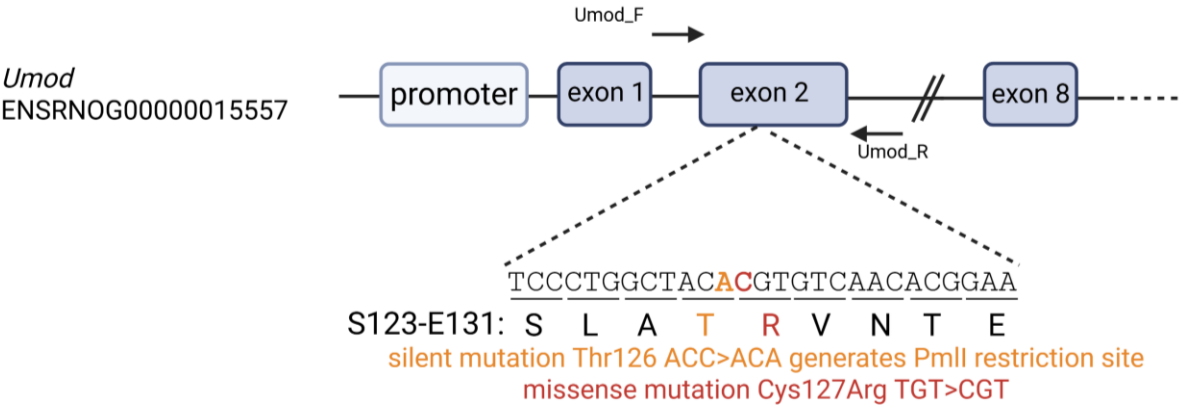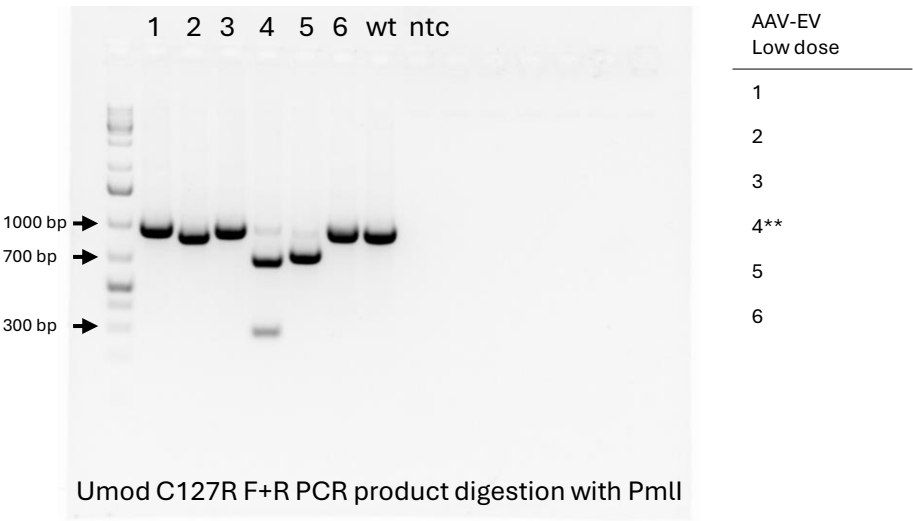

\*\* genotype confirmed by Sanger sequencing

| PCR reaction   | Primers sequence (5'>3')                                                   | Product size (bp) |
|----------------|----------------------------------------------------------------------------|-------------------|
| Umod C127R F   | AGGTGTTCTGAATGCCACGA                                                       | 993               |
| Umod C127R R   | ATCTCCCTCTGAGTCTCACCT                                                      |                   |
| PmlI digestion | WT product – no digestion, C127R positive product – 293 + 710 bp fragments |                   |

M) SD-Umod<sup>em1</sup>(DelY178-R186)Ccpcz

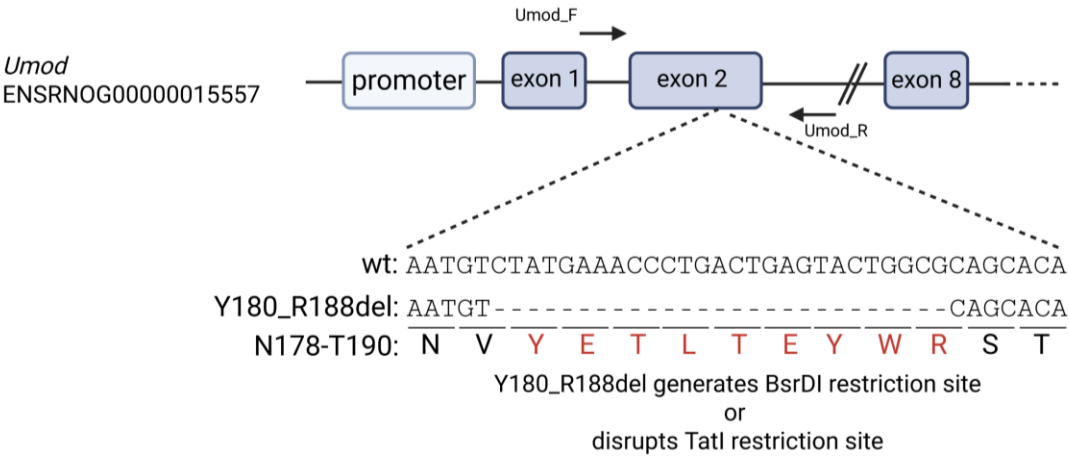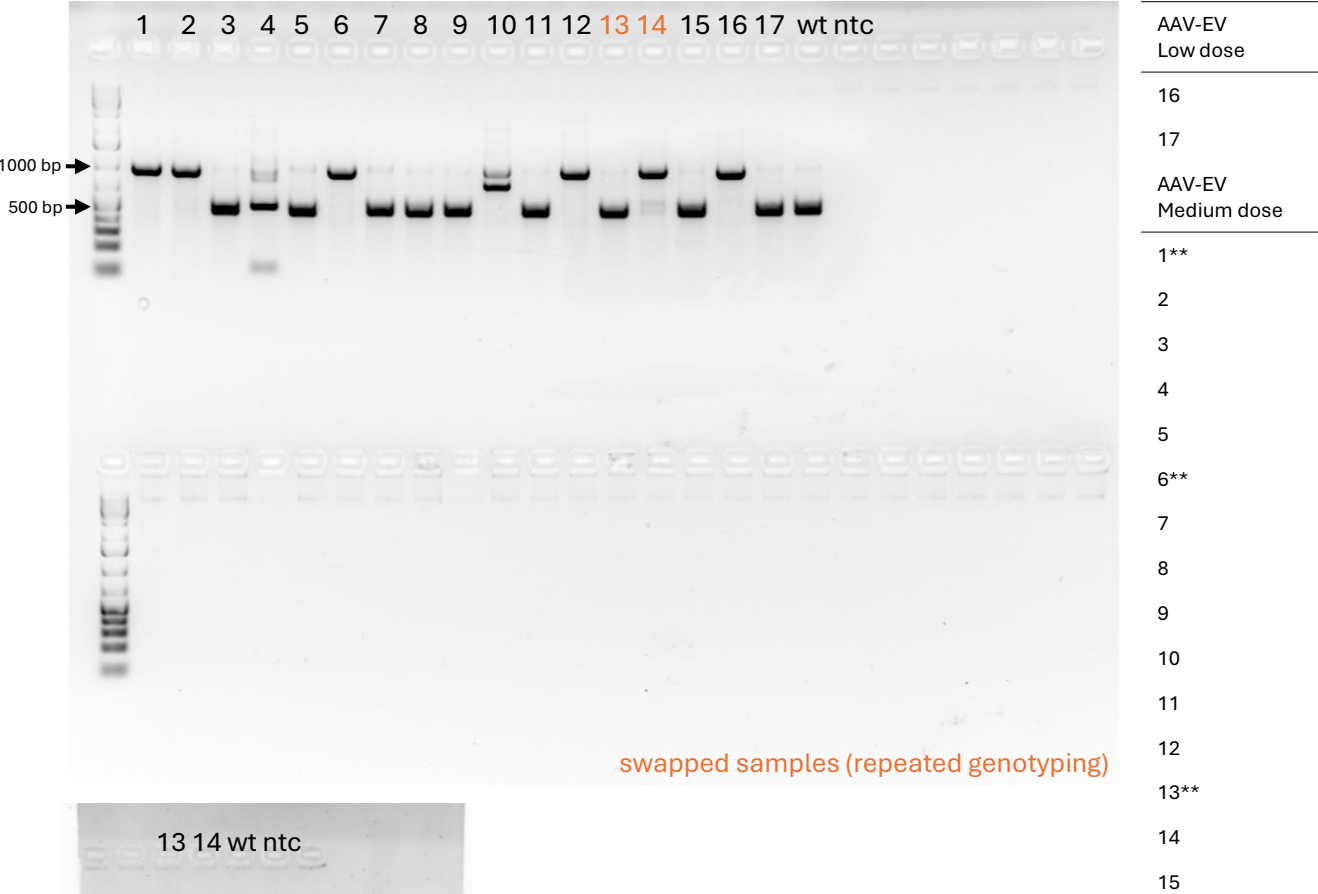

swapped samples (repeated genotyping)

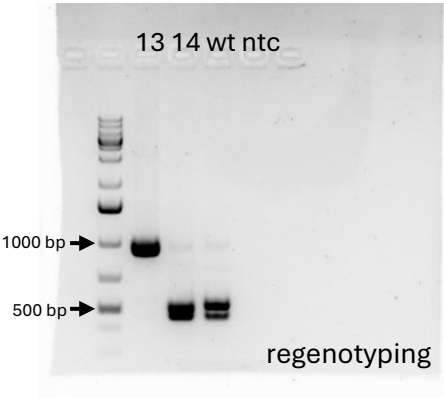

\*\* genotype confirmed by Sanger sequencing

| PCR reaction   | Primers sequence (5'>3')                                                                  | Product size (bp) |
|----------------|-------------------------------------------------------------------------------------------|-------------------|
| Umod YR F      | AGGTGTTCTGAATGCCACGA                                                                      | 993               |
| Umod YR R      | ATCTCCCTCTGAGTCTCACCT                                                                     |                   |
| PmlI digestion | WT product – after TatI digestion: 458+532bp, Y180-R188 deletion positive product: 993 bp |                   |

N) *SD-Muc1<sup>em1</sup>(MUC1wt)Ccpcz*

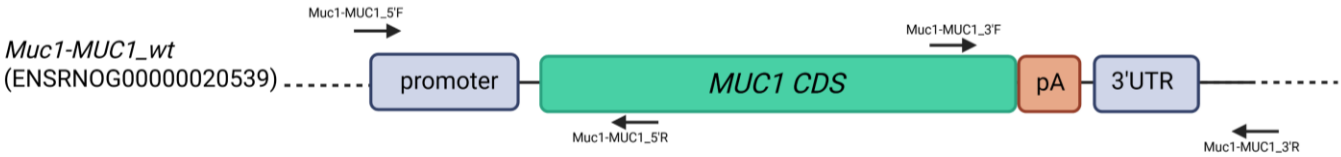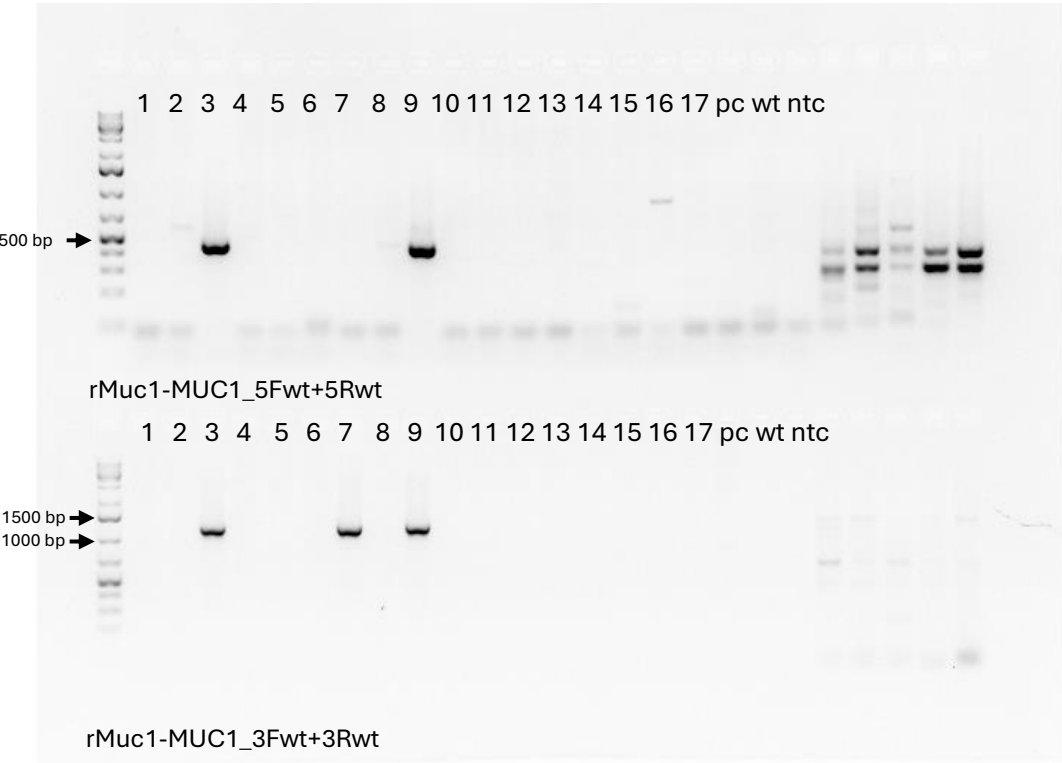

AAV-EV  
Low dose

- 1
- 2
- 3\*
- 4
- 5
- 6
- 7
- 8
- 9\*
- 10
- 11
- 12
- 13
- 14
- 15
- 16
- 17

| 3'reaction      | Primers sequence (5'>3') | Product size (bp) |
|-----------------|--------------------------|-------------------|
| rMuc1-MUC1_3Fwt | TTTCCCATTTTCCGCCAGT      | 1160              |
| rMuc1-MUC1_3Rwt | ACAGTTATGGCGCGAGTTGA     |                   |
| 5'reaction      | Primers sequence (5'>3') | Product size (bp) |
| rMuc1-MUC1 5Fwt | TGGGGTACTCAAAGAGTGTTG    | 446               |
| rMuc1-MUC1 5Rwt | CATTCTTCTCGGTAGAGGATGGC  |                   |

O) *SD-Muc1<sup>em2</sup>(MUC1fs)Ccpcz*

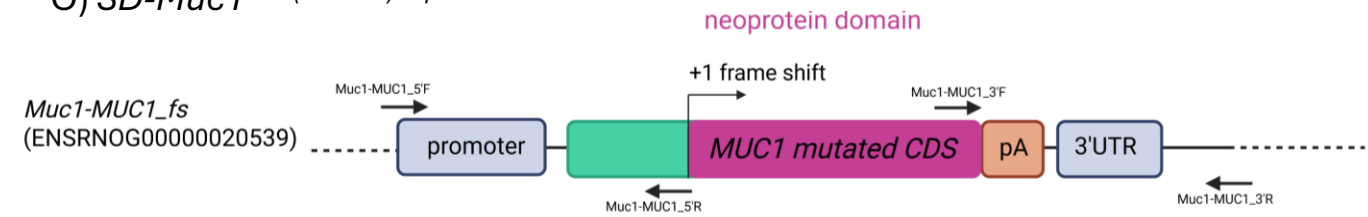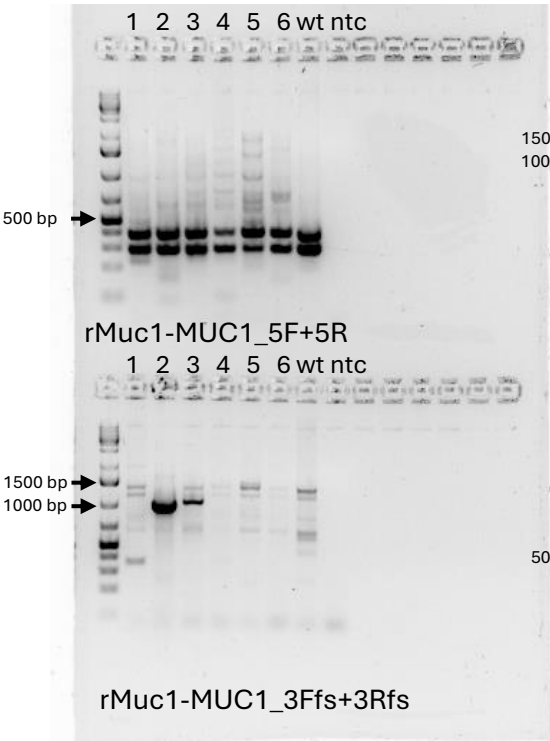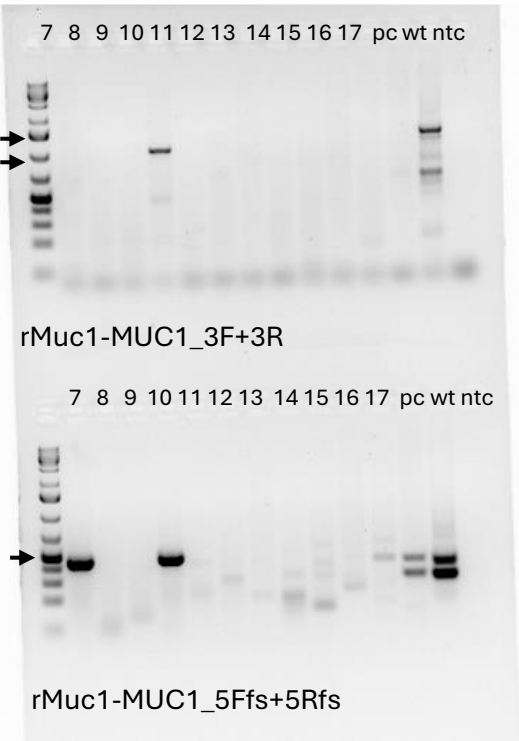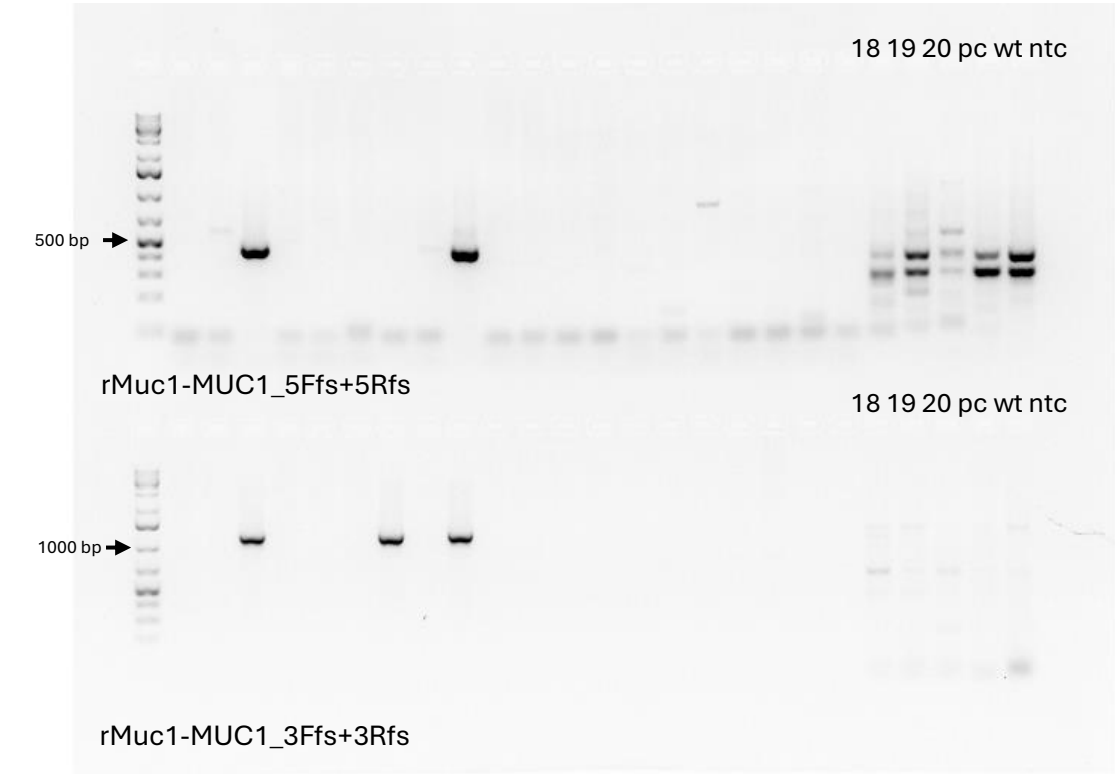

| AAV-EV medium dose |  |
|--------------------|--|
| 1                  |  |
| 2                  |  |
| 3                  |  |
| 4                  |  |
| 5                  |  |
| 6                  |  |
| AAV-EV low dose    |  |
| 7                  |  |
| 8                  |  |
| 9                  |  |
| 10*                |  |
| 11                 |  |
| 12                 |  |
| 13                 |  |
| 14                 |  |
| 15                 |  |
| 16                 |  |
| 17                 |  |
| 18                 |  |
| 19                 |  |
| 20                 |  |

| 3'reaction      | Primers sequence (5'>3') | Product size (bp) | 5'reaction      | Primers sequence (5'>3') | Product size (bp) |
|-----------------|--------------------------|-------------------|-----------------|--------------------------|-------------------|
| rMuc1-MUC1_3Ffs | CTTTTATAGCGGCGCCCAAGA    | 1160              | rMuc1-MUC1 5Ffs | TGGGGTACTCAAAGAGTGGTTG   | 446               |
| rMuc1-MUC1_3Rfs | CACACCTGGCCAGCTAAGAAT    |                   | rMuc1-MUC1 5Rfs | CGTTCTTCTCGGTGGAGCTTGGC  |                   |

## Additional file 8 figure: Detection of transgenic cassette in a corresponding rodent model

(A) C57BL/6NCrI-Ube3a<sup>em2(BioID2)Ccpcz</sup> mouse line: site-specific insertion of Ube3a-BioID2 cassette in the genome detected at the 5' and 3' end. (B) C57BL/6NCrI-Sox2<sup>em1(P2A-mStrawberry)Ccpcz</sup> mouse line: site-specific insertion of Sox2-mStrawberry cassette in the genome detected at the 5' and 3' end. (C) C57BL/6NCrI-Lck<sup>em2Ccpcz</sup> mouse line: loxP insertion detected via XhoI digestion of the PCR product. (D) C57BL/6NCrI-Actn1<sup>em1Ccpcz</sup> mouse line: site-specific insertion of Actn1 cKO cassette in the genome detected at the 5' and 3' end; detection of loxP1 (loxP1 reaction) and of both loxP sites on the same allele (loxP1-2 reaction). (E) C57BL/6NCrI-Nes<sup>em1(rtTA3,DTR,iRFP670)Ccpcz</sup> mouse line: site-specific insertion of Nes-rtTA/DTR/iRFP670 cassette in the genome detected at the 5' and 3' end. (F) C57BL/6NCrI-Dpp4<sup>em1(rtTA3,DTR,mKate)Ccpcz</sup> mouse model: site-specific insertion of Dpp4-rtTA3-DTR-mKate2 cassette in the genome detected at the 5' and 3' end. (G) C57BL/6NCrI-Batf3<sup>em1(iCre,eGFP)Ccpcz</sup> mouse model: site-specific insertion of Batf3-iCre-eGFP cassette in the genome detected at the 5' and 3' end. (H) C57BL/6NCrI-Alox5ap<sup>em1(CCre,CGFP)Ccpcz</sup> mouse model: site-specific insertion of Alox5ap-CCreCGFP cassette in the genome detected at the 5' and 3' end. (I) C57BL/6NCrI-Lyve<sup>em1(NCre,NGFP)Ccpcz</sup> mouse line: site-specific of Lyve1-NCre-NGFP cassette insertion in the genome detected at the 5' and 3' end. (J) Genome-transgene junction genotyping of C57BL/6NCrI-Sox2<sup>em1(P2A-mStrawberry)Ccpcz</sup> animals targeted with Sox-mStr construct using AAVs and distinct doses of AAV-EV vector prepared with UCF-method. (K) Genome-transgene junction genotyping of C57BL/6NCrI-Alb<sup>em6(Cyp3a4,P2A,Ces1)Ccpcz</sup> animals targeted with Alb-CYP3A4-CES1 construct using AAVs and distinct doses of AAV-EV vector prepared with UCF-method. (L) SD-Umod<sup>em1(C126R)Ccpcz</sup> rat line: C127R insertion detected via PmlI digestion of the PCR product and Sanger sequencing. (M) SD-Umod<sup>em1(DelY178-R186)Ccpcz</sup> rat line: Y180-R188 deletion confirmed by loss of TatI restriction site and Sanger sequencing. (N) *SD-Muc1*<sup>em1(MUC1wt)Ccpcz</sup> rat line: site-specific insertion of Muc1-MUC1<sub>wt</sub> (human MUC1 wild-type coding sequence) cassette in the genome detected at the 5' and 3' end. (O) *SD-Muc1*<sup>em2(MUC1fs)Ccpcz</sup> rat line: site-specific insertion of Muc1-MUC1<sub>fs</sub> (human MUC1 coding sequence with +1 frame shift) cassette in the genome detected at the 5' and 3' end.

Positive animals are marked by an asterisk (\*) in the side column, which also summarizes the number of animals per treated group. Positive animals confirmed by sanger sequencing are marked by a double asterick (\*\*). Tables summarize used proteins for corresponding reaction.



Table: List of gRNA spacers used in rodent model generation

| AAV-EV                     | Model                                                   | Spacer (5'-3')        |
|----------------------------|---------------------------------------------------------|-----------------------|
| Ube3a-BioID2               | C57BL/6NCrl-Ube3a <sup>em2</sup> (BioID2)Ccpcz          | ATCACATATGCCAAAGGATT  |
| Sox2-mStrawberry           | C57BL/6NCrl-Sox2 <sup>em1</sup> (P2A-mStrawberry)Ccpcz  | CTGCCCCCTGTCGCACATGTG |
| Lck loxP2                  | C57BL/6NCrl-Lck <sup>em2</sup> Ccpcz                    | GGAGTGCAAATCTTCCAGGA  |
| Actn1 cKO                  | C57BL/6NCrl-Actn1 <sup>em1</sup> Ccpcz                  | TAAGGCCTTTAGTGAACGGGT |
|                            |                                                         | GCGTGACATCCCGGGTCCC   |
| Nes-rtTA3-DTR-IRES-iRFP670 | C57BL/6NCrl-Nes <sup>em1</sup> (rtTA3,DTR,iRFP670)Ccpcz | GACGCAACCCTCCATGTGCGC |
| Dpp4-rtTA3-DTR-H1-mKate2   | C57BL/6NCrl-Dpp4 <sup>em1</sup> (rtTA3,DTR,mKate)Ccpcz  | AAGGAGCCGCCCGACCATGA  |
| Batf3-iCre-eGFP            | C57BL/6NCrl-Batf3 <sup>em1</sup> (iCre,eGFP)Ccpcz       | AGTGAGCTGGGGTGTCATCG  |
| Alox5ap-CCre-CGFP          | C57BL/6NCrl-Alox5ap <sup>em1</sup> (CCre, CGFP)Ccpcz    | TGGCGGGCCTGAAGCAAGCA  |
| Lyve1NCre-NGFP             | C57BL/6NCrl-Lyve <sup>em1</sup> (NCre, NGFP)Ccpcz       | GTAACACCAGGCTAGTGTGC  |
| Alb-CYP3A4-CES1            | C57BL/6NCrl-Alb <sup>em6</sup> (Cyp3a4,P2A,Ces1)Ccpcz   | AGCCTCTGGCAAAATGAAGT  |
|                            |                                                         | GTTGTGATGTGTTTAGGCTA  |
| Umod C127R                 | SD-Umod <sup>em1</sup> (C126R)Ccpcz                     | GCTGCCTTCCGTGTTGACAC  |
| Umod Y180_R188del          | SD-Umod <sup>em1</sup> (DelY178-R186)Ccpcz              | GGGTTTCATAGACATTGCAG  |
|                            |                                                         | TACTGGCGCAGCACAGACTA  |
| Muc1-MUC1_wt/fs            | <i>SD-Muc1</i> <sup>em1</sup> (MUC1)Ccpcz               | AACCCGTATGCCCGGGGTCA  |
|                            | <i>SD-Muc1</i> <sup>em2</sup> (MUC1fs)Ccpcz             | CTCCTACAAGTTGGCCGAAG  |
